# Supplementary material for: Identifying Candidate Genes for Short Gestation Length Trait in Chinese Qingping Pigs by Whole-Genome Resequencing and RNA Sequencing
Source: Front Genet. 2022 May 16;13:857705. doi: 10.3389/fgene.2022.857705 (PMC9159352; doi:10.3389/fgene.2022.857705)
Supplement: Supplementary file 3 [file Table6.XLSX]

## Sheet: summary
Table S6. Candidate genes of RNA-seq.
external_gene_name	ensembl_gene_id	description
GPD1	ENSSSCG00000000214	glycerol-3-phosphate dehydrogenase 1 [Source:NCBI gene;Acc:100153250]
IRAK3	ENSSSCG00000000475	interleukin 1 receptor associated kinase 3 [Source:NCBI gene;Acc:100514645]
STYK1	ENSSSCG00000000634	serine/threonine/tyrosine kinase 1 [Source:NCBI gene;Acc:100523437]
SLC2A13	ENSSSCG00000000783	solute carrier family 2 member 13 [Source:NCBI gene;Acc:106504075]
CHST11	ENSSSCG00000000837	carbohydrate sulfotransferase 11 [Source:NCBI gene;Acc:100157186]
SLC6A15	ENSSSCG00000000936	solute carrier family 6 member 15 [Source:NCBI gene;Acc:100628231]
ZSCAN9	ENSSSCG00000001203	zinc finger and SCAN domain containing 9 [Source:NCBI gene;Acc:100154531]
UBD	ENSSSCG00000001252	ubiquitin D [Source:NCBI gene;Acc:100294688]
AGER	ENSSSCG00000001437	advanced glycosylation end-product specific receptor [Source:NCBI gene;Acc:396591]
ETV7	ENSSSCG00000001561	ETS variant transcription factor 7 [Source:NCBI gene;Acc:100156210]
ADAMTSL3	ENSSSCG00000001793	ADAMTS like 3 [Source:NCBI gene;Acc:100157238]
CFAP100	ENSSSCG00000001826	cilia and flagella associated protein 100 [Source:NCBI gene;Acc:100155072]
SLCO3A1	ENSSSCG00000002263	solute carrier organic anion transporter family member 3A1 [Source:NCBI gene;Acc:100156054]
CHGA	ENSSSCG00000002456	chromogranin A [Source:NCBI gene;Acc:397540]
OTUB2	ENSSSCG00000002469	OTU deubiquitinase, ubiquitin aldehyde binding 2 [Source:NCBI gene;Acc:100151873]
SERPINA11	ENSSSCG00000002479	serpin family A member 11 [Source:NCBI gene;Acc:100155953]
PLCG2	ENSSSCG00000002688	phospholipase C gamma 2 [Source:NCBI gene;Acc:100518663]
	ENSSSCG00000002825	carboxylesterase 1 [Source:NCBI gene;Acc:397478]
TOX3	ENSSSCG00000002835	TOX high mobility group box family member 3 [Source:NCBI gene;Acc:100519713]
GPT2	ENSSSCG00000002847	glutamic--pyruvic transaminase 2 [Source:NCBI gene;Acc:100521318]
	ENSSSCG00000003047
ZNF541	ENSSSCG00000003119	zinc finger protein 541 [Source:NCBI gene;Acc:100519367]
KCNJ14	ENSSSCG00000003135	potassium inwardly rectifying channel subfamily J member 14 [Source:NCBI gene;Acc:100521454]
	ENSSSCG00000004081
PPP1R14C	ENSSSCG00000004094	protein phosphatase 1 regulatory inhibitor subunit 14C [Source:NCBI gene;Acc:100521302]
LRP11	ENSSSCG00000004101	LDL receptor related protein 11 [Source:NCBI gene;Acc:100153355]
VNN1	ENSSSCG00000004181	vanin 1 [Source:NCBI gene;Acc:397246]
ADGRB3	ENSSSCG00000004270	adhesion G protein-coupled receptor B3 [Source:NCBI gene;Acc:100736796]
ARMC2	ENSSSCG00000004388	armadillo repeat containing 2 [Source:NCBI gene;Acc:100523341]
SCG3	ENSSSCG00000004630	secretogranin III [Source:NCBI gene;Acc:100154760]
HDC	ENSSSCG00000004644	histidine decarboxylase [Source:NCBI gene;Acc:100156724]
FBXO15	ENSSSCG00000004873	F-box protein 15 [Source:NCBI gene;Acc:100516237]
ALPK2	ENSSSCG00000004918	alpha kinase 2 [Source:NCBI gene;Acc:100152584]
	ENSSSCG00000005307	phospholipid-transporting ATPase FetA-like [Source:NCBI gene;Acc:100156421]
RECK	ENSSSCG00000005338	reversion inducing cysteine rich protein with kazal motifs [Source:NCBI gene;Acc:100519638]
FRMPD1	ENSSSCG00000005352	FERM and PDZ domain containing 1 [Source:NCBI gene;Acc:100153190]
ANKS6	ENSSSCG00000005378	ankyrin repeat and sterile alpha motif domain containing 6 [Source:NCBI gene;Acc:100152629]
CA3	ENSSSCG00000006141	carbonic anhydrase 3 [Source:NCBI gene;Acc:494016]
E2F5	ENSSSCG00000006145	E2F transcription factor 5 [Source:NCBI gene;Acc:100157957]
SBSPON	ENSSSCG00000006183	somatomedin B and thrombospondin type 1 domain containing [Source:NCBI gene;Acc:100517890]
SLCO5A1	ENSSSCG00000006196	solute carrier organic anion transporter family member 5A1 [Source:NCBI gene;Acc:100157250]
CRP	ENSSSCG00000006403	C-reactive protein [Source:NCBI gene;Acc:100620468]
FCER1A	ENSSSCG00000006413	Fc fragment of IgE receptor Ia [Source:NCBI gene;Acc:100152827]
MEX3A	ENSSSCG00000006497	mex-3 RNA binding family member A [Source:NCBI gene;Acc:100155949]
	ENSSSCG00000006592	S100 calcium binding protein A7 [Source:NCBI gene;Acc:100144623]
FMO5	ENSSSCG00000006702	flavin containing dimethylaniline monoxygenase 5 [Source:NCBI gene;Acc:100152950]
	ENSSSCG00000006842
PLPPR4	ENSSSCG00000006875	phospholipid phosphatase related 4 [Source:NCBI gene;Acc:100158146]
ANKEF1	ENSSSCG00000007063	ankyrin repeat and EF-hand domain containing 1 [Source:NCBI gene;Acc:100517504]
SOGA1	ENSSSCG00000007324	suppressor of glucose, autophagy associated 1 [Source:NCBI gene;Acc:100152865]
TOMM34	ENSSSCG00000007383	translocase of outer mitochondrial membrane 34 [Source:NCBI gene;Acc:100157194]
MMP9	ENSSSCG00000007436	matrix metallopeptidase 9 [Source:NCBI gene;Acc:654325]
EYA2	ENSSSCG00000007453	EYA transcriptional coactivator and phosphatase 2 [Source:NCBI gene;Acc:100624872]
CASS4	ENSSSCG00000007495	Cas scaffold protein family member 4 [Source:NCBI gene;Acc:100126293]
GCNT7	ENSSSCG00000007497	glucosaminyl (N-acetyl) transferase family member 7 [Source:NCBI gene;Acc:100134987]
PSPH	ENSSSCG00000007748	phosphoserine phosphatase [Source:NCBI gene;Acc:100316854]
STX1A	ENSSSCG00000007772	syntaxin 1A [Source:NCBI gene;Acc:100512594]
ACSM3	ENSSSCG00000007857	acyl-CoA synthetase medium chain family member 3 [Source:NCBI gene;Acc:100512220]
HBM	ENSSSCG00000007977	hemoglobin subunit mu [Source:NCBI gene;Acc:100737727]
LTBP1	ENSSSCG00000008510	latent transforming growth factor beta binding protein 1 [Source:NCBI gene;Acc:100627243]
MYCN	ENSSSCG00000008618	MYCN proto-oncogene, bHLH transcription factor [Source:NCBI gene;Acc:100518190]
ABLIM2	ENSSSCG00000008721	actin binding LIM protein family member 2 [Source:NCBI gene;Acc:100522624]
LRAT	ENSSSCG00000008995	lecithin retinol acyltransferase [Source:NCBI gene;Acc:100513994]
RNF150	ENSSSCG00000009053	ring finger protein 150 [Source:NCBI gene;Acc:100624789]
INTU	ENSSSCG00000009079	inturned planar cell polarity protein [Source:NCBI gene;Acc:100518740]
MMRN1	ENSSSCG00000009202	multimerin 1 [Source:NCBI gene;Acc:100516922]
NEFL	ENSSSCG00000009649	neurofilament light [Source:NCBI gene;Acc:100521224]
RPH3A	ENSSSCG00000009883	rabphilin 3A [Source:NCBI gene;Acc:100736858]
	ENSSSCG00000010546	cytochrome P450 2C33 [Source:NCBI gene;Acc:403107]
NRAP	ENSSSCG00000010640	nebulin related anchoring protein [Source:NCBI gene;Acc:733691]
VWA2	ENSSSCG00000010649	von Willebrand factor A domain containing 2 [Source:NCBI gene;Acc:100152718]
EBF3	ENSSSCG00000010757	EBF transcription factor 3 [Source:NCBI gene;Acc:100153848]
HHIPL2	ENSSSCG00000010832	HHIP like 2 [Source:NCBI gene;Acc:100517774]
GALNT15	ENSSSCG00000011195	polypeptide N-acetylgalactosaminyltransferase 15 [Source:NCBI gene;Acc:100157572]
DCLK3	ENSSSCG00000011241	doublecortin like kinase 3 [Source:NCBI gene;Acc:100514320]
SLC22A13	ENSSSCG00000011256	solute carrier family 22 member 13 [Source:NCBI gene;Acc:100518094]
ZNF619	ENSSSCG00000011271	zinc finger protein 619 [Source:HGNC Symbol;Acc:HGNC:26910]
PTH1R	ENSSSCG00000011326	parathyroid hormone 1 receptor [Source:NCBI gene;Acc:397675]
CHL1	ENSSSCG00000011524	cell adhesion molecule L1 like [Source:NCBI gene;Acc:100511780]
GPR156	ENSSSCG00000011888	G protein-coupled receptor 156 [Source:NCBI gene;Acc:100522832]
	ENSSSCG00000012071	immunoglobulin superfamily member 5 [Source:NCBI gene;Acc:100517006]
EGFL6	ENSSSCG00000012121	EGF like domain multiple 6 [Source:NCBI gene;Acc:100153585]
CA5B	ENSSSCG00000012141	carbonic anhydrase 5B [Source:NCBI gene;Acc:100156418]
REPS2	ENSSSCG00000012150	RALBP1 associated Eps domain containing 2 [Source:NCBI gene;Acc:100738275]
NHS	ENSSSCG00000012151	NHS actin remodeling regulator [Source:NCBI gene;Acc:100152239]
WNK3	ENSSSCG00000012332	WNK lysine deficient protein kinase 3 [Source:NCBI gene;Acc:100156408]
ALAS2	ENSSSCG00000012347	5'-aminolevulinate synthase 2 [Source:NCBI gene;Acc:100518817]
KLHL4	ENSSSCG00000012467	kelch like family member 4 [Source:NCBI gene;Acc:100524840]
ARMCX2	ENSSSCG00000012510	armadillo repeat containing X-linked 2 [Source:NCBI gene;Acc:100521941]
ZMAT1	ENSSSCG00000012512	zinc finger matrin-type 1 [Source:NCBI gene;Acc:100151894]
	ENSSSCG00000012517	thymosin beta 15B [Source:NCBI gene;Acc:100525848]
TCEAL1	ENSSSCG00000012532	transcription elongation factor A like 1 [Source:NCBI gene;Acc:100524474]
DCX	ENSSSCG00000012585	doublecortin [Source:NCBI gene;Acc:100523160]
CPT1A	ENSSSCG00000012880	carnitine palmitoyltransferase 1A [Source:NCBI gene;Acc:399527]
PPP2R5B	ENSSSCG00000013016	protein phosphatase 2 regulatory subunit B'beta [Source:NCBI gene;Acc:100516242]
GLYATL2	ENSSSCG00000013148	glycine-N-acyltransferase like 2 [Source:NCBI gene;Acc:100525206]
ELF5	ENSSSCG00000013301	E74 like ETS transcription factor 5 [Source:NCBI gene;Acc:100510890]
SLC5A12	ENSSSCG00000013338	solute carrier family 5 member 12 [Source:NCBI gene;Acc:100519011]
MUC15	ENSSSCG00000013340	mucin 15, cell surface associated [Source:NCBI gene;Acc:102165819]
LUZP2	ENSSSCG00000013341	leucine zipper protein 2 [Source:NCBI gene;Acc:100520176]
ZFR2	ENSSSCG00000013495	zinc finger RNA binding protein 2 [Source:NCBI gene;Acc:100521543]
BHMT	ENSSSCG00000014108	betaine--homocysteine S-methyltransferase 2 [Source:NCBI gene;Acc:100523776]
KCNN2	ENSSSCG00000014213	potassium calcium-activated channel subfamily N member 2 [Source:NCBI gene;Acc:100519705]
ELMOD1	ENSSSCG00000015002	ELMO domain containing 1 [Source:NCBI gene;Acc:100626413]
BCO2	ENSSSCG00000015039	beta-carotene oxygenase 2 [Source:NCBI gene;Acc:100517547]
SORL1	ENSSSCG00000015135	sortilin related receptor 1 [Source:NCBI gene;Acc:100626812]
TMEM45B	ENSSSCG00000015241	transmembrane protein 45B [Source:NCBI gene;Acc:100516991]
STEAP4	ENSSSCG00000015299	STEAP4 metalloreductase [Source:NCBI gene;Acc:100310802]
COL28A1	ENSSSCG00000015342	collagen type XXVIII alpha 1 chain [Source:NCBI gene;Acc:100510974]
TMEM196	ENSSSCG00000015373	transmembrane protein 196 [Source:NCBI gene;Acc:100626890]
KIAA1324L	ENSSSCG00000015394	KIAA1324 like [Source:NCBI gene;Acc:100523199]
FLVCR1	ENSSSCG00000015590	FLVCR heme transporter 1 [Source:NCBI gene;Acc:100217398]
TLR3	ENSSSCG00000015801	toll like receptor 3 [Source:NCBI gene;Acc:100037937]
SCN3A	ENSSSCG00000015911	sodium voltage-gated channel alpha subunit 3 [Source:NCBI gene;Acc:100625056]
HOXD9	ENSSSCG00000015982	homeobox D9 [Source:NCBI gene;Acc:110255183]
CFAP65	ENSSSCG00000016203	cilia and flagella associated protein 65 [Source:NCBI gene;Acc:100155984]
	ENSSSCG00000016215	tubulin alpha-1D chain [Source:NCBI gene;Acc:100158003]
COL4A3	ENSSSCG00000016245	collagen type IV alpha 3 chain [Source:NCBI gene;Acc:100621504]
NMUR1	ENSSSCG00000016277	neuromedin U receptor 1 [Source:NCBI gene;Acc:100520336]
RAMP1	ENSSSCG00000016331	receptor activity modifying protein 1 [Source:NCBI gene;Acc:397401]
SHH	ENSSSCG00000016416	sonic hedgehog signaling molecule [Source:NCBI gene;Acc:100512749]
GALNTL5	ENSSSCG00000016431	polypeptide N-acetylgalactosaminyltransferase like 5 [Source:NCBI gene;Acc:100515695]
TRPV5	ENSSSCG00000016469	transient receptor potential cation channel subfamily V member 5 [Source:NCBI gene;Acc:100622162]
PTPRZ1	ENSSSCG00000016614	protein tyrosine phosphatase receptor type Z1 [Source:NCBI gene;Acc:100511294]
NNT	ENSSSCG00000016877	nicotinamide nucleotide transhydrogenase [Source:NCBI gene;Acc:100526144]
IL31RA	ENSSSCG00000016915	interleukin 31 receptor A [Source:NCBI gene;Acc:100522044]
MEOX1	ENSSSCG00000017376	mesenchyme homeobox 1 [Source:NCBI gene;Acc:100516574]
TBX21	ENSSSCG00000017517	T-box transcription factor 21 [Source:NCBI gene;Acc:100518804]
HOXB5	ENSSSCG00000017540	homeobox B5 [Source:NCBI gene;Acc:100522700]
SAMD14	ENSSSCG00000017585	sterile alpha motif domain containing 14 [Source:NCBI gene;Acc:102159512]
SPAG5	ENSSSCG00000017758	sperm associated antigen 5 [Source:NCBI gene;Acc:100286810]
PROCA1	ENSSSCG00000017770	protein interacting with cyclin A1 [Source:NCBI gene;Acc:100514366]
CAMKK1	ENSSSCG00000017873	calcium/calmodulin dependent protein kinase kinase 1 [Source:NCBI gene;Acc:503667]
ALDH3A1	ENSSSCG00000018044	aldehyde dehydrogenase 3 family member A1 [Source:NCBI gene;Acc:100526075]
ATP8	ENSSSCG00000018080	ATP synthase F0 subunit 8 [Source:NCBI gene;Acc:808505]
ATP6	ENSSSCG00000018081	ATP synthase F0 subunit 6 [Source:NCBI gene;Acc:808506]
COX3	ENSSSCG00000018082	cytochrome c oxidase subunit III [Source:NCBI gene;Acc:808507]
GIPR	ENSSSCG00000021053	gastric inhibitory polypeptide receptor [Source:NCBI gene;Acc:100626628]
CKS2	ENSSSCG00000021161	CDC28 protein kinase regulatory subunit 2 [Source:NCBI gene;Acc:100520933]
SELENOP	ENSSSCG00000021208	selenoprotein P [Source:NCBI gene;Acc:100037964]
GPSM2	ENSSSCG00000021440	G protein signaling modulator 2 [Source:NCBI gene;Acc:100518248]
SOAT1	ENSSSCG00000021464	sterol O-acyltransferase 1 [Source:NCBI gene;Acc:100628166]
SUCNR1	ENSSSCG00000022105	succinate receptor 1 [Source:NCBI gene;Acc:100739158]
PROSER2	ENSSSCG00000022247	proline and serine rich 2 [Source:NCBI gene;Acc:100627913]
P2RX1	ENSSSCG00000022405	purinergic receptor P2X 1 [Source:NCBI gene;Acc:106504105]
ZNF235	ENSSSCG00000022434	zinc finger protein 235 [Source:HGNC Symbol;Acc:HGNC:12866]
SEL1L3	ENSSSCG00000022446	SEL1L family member 3 [Source:NCBI gene;Acc:100518082]
ZNF232	ENSSSCG00000022999	zinc finger protein 232 [Source:NCBI gene;Acc:100514871]
PCDHGB5	ENSSSCG00000023485	protocadherin gamma subfamily B, 5 [Source:HGNC Symbol;Acc:HGNC:8712]
TAC1	ENSSSCG00000023592	tachykinin precursor 1 [Source:NCBI gene;Acc:100525179]
GABRA1	ENSSSCG00000023661	gamma-aminobutyric acid type A receptor subunit alpha1 [Source:NCBI gene;Acc:100516706]
SLC2A4	ENSSSCG00000023915	solute carrier family 2 member 4 [Source:NCBI gene;Acc:396754]
DRAM1	ENSSSCG00000023972	DNA damage regulated autophagy modulator 1 [Source:NCBI gene;Acc:100462750]
TMEM178A	ENSSSCG00000024293	transmembrane protein 178A [Source:NCBI gene;Acc:100738444]
RIBC2	ENSSSCG00000024718	RIB43A domain with coiled-coils 2 [Source:NCBI gene;Acc:100519482]
	ENSSSCG00000024914	complement factor B [Source:NCBI gene;Acc:100124383]
TEAD2	ENSSSCG00000025568	TEA domain transcription factor 2 [Source:NCBI gene;Acc:100625350]
FBXO2	ENSSSCG00000025667	F-box protein 2 [Source:NCBI gene;Acc:100511640]
TMEM72	ENSSSCG00000025787	transmembrane protein 72 [Source:NCBI gene;Acc:100512136]
CSF3R	ENSSSCG00000025795	colony stimulating factor 3 receptor [Source:NCBI gene;Acc:100622336]
BOC	ENSSSCG00000025826	BOC cell adhesion associated, oncogene regulated [Source:NCBI gene;Acc:100626085]
CLGN	ENSSSCG00000026360	calmegin [Source:NCBI gene;Acc:100624991]
SNCG	ENSSSCG00000026850	synuclein gamma [Source:NCBI gene;Acc:100125343]
MRAP2	ENSSSCG00000026943	melanocortin 2 receptor accessory protein 2 [Source:NCBI gene;Acc:100515980]
A4GALT	ENSSSCG00000026962	alpha 1,4-galactosyltransferase (P blood group) [Source:NCBI gene;Acc:100524987]
CACNA2D3	ENSSSCG00000027019	calcium voltage-gated channel auxiliary subunit alpha2delta 3 [Source:NCBI gene;Acc:100153986]
ENTPD6	ENSSSCG00000027070	ectonucleoside triphosphate diphosphohydrolase 6 [Source:NCBI gene;Acc:100626131]
DSG3	ENSSSCG00000027160	desmoglein 3 [Source:NCBI gene;Acc:100625733]
NLGN3	ENSSSCG00000027465	neuroligin 3 [Source:NCBI gene;Acc:106504062]
	ENSSSCG00000027852
PDE3A	ENSSSCG00000028662	phosphodiesterase 3A [Source:NCBI gene;Acc:396555]
DOK6	ENSSSCG00000028977	docking protein 6 [Source:NCBI gene;Acc:100517871]
ALDH1A1	ENSSSCG00000028996	aldehyde dehydrogenase 1 family member A1 [Source:NCBI gene;Acc:100517137]
	ENSSSCG00000029248	solute carrier family 22 member 10 [Source:NCBI gene;Acc:100737764]
	ENSSSCG00000030269	beta-1,4 N-acetylgalactosaminyltransferase 2-like [Source:NCBI gene;Acc:110255214]
GSTO2	ENSSSCG00000030271	glutathione S-transferase omega-2 [Source:NCBI gene;Acc:100152209]
HAPLN3	ENSSSCG00000030597	hyaluronan and proteoglycan link protein 3 [Source:NCBI gene;Acc:100157078]
WIF1	ENSSSCG00000030998	WNT inhibitory factor 1 [Source:NCBI gene;Acc:100512657]
TM4SF5	ENSSSCG00000031112	transmembrane 4 L six family member 5 [Source:NCBI gene;Acc:100513308]
AGBL4	ENSSSCG00000031300	BEN domain containing 5 [Source:NCBI gene;Acc:110261423]
NECAB1	ENSSSCG00000031424	N-terminal EF-hand calcium binding protein 1 [Source:NCBI gene;Acc:100737996]
	ENSSSCG00000031595	serpin A3-8 [Source:NCBI gene;Acc:106504547]
ACSL5	ENSSSCG00000031789	acyl-CoA synthetase long chain family member 5 [Source:NCBI gene;Acc:100157521]
REM2	ENSSSCG00000031874	RRAD and GEM like GTPase 2 [Source:NCBI gene;Acc:100622301]
NKAIN1	ENSSSCG00000032193	sodium/potassium transporting ATPase interacting 1 [Source:NCBI gene;Acc:100516496]
NGF	ENSSSCG00000032417	nerve growth factor [Source:NCBI gene;Acc:100738968]
CYP4V2	ENSSSCG00000032687	cytochrome P450, family 4, subfamily v, polypeptide 2 [Source:NCBI gene;Acc:100113469]
	ENSSSCG00000033122
	ENSSSCG00000033179	disintegrin and metalloproteinase domain-containing protein 20-like [Source:NCBI gene;Acc:110258345]
SULT2A1	ENSSSCG00000033207	sulfotransferase family 2A member 1 [Source:NCBI gene;Acc:641359]
	ENSSSCG00000033555
FAM111A	ENSSSCG00000033703	family with sequence similarity 111 member A [Source:NCBI gene;Acc:100525029]
B4GALNT4	ENSSSCG00000033780	beta-1,4-N-acetyl-galactosaminyltransferase 4 [Source:NCBI gene;Acc:100623649]
TMEM69	ENSSSCG00000034035	transmembrane protein 69 [Source:NCBI gene;Acc:110261239]
SV2C	ENSSSCG00000034062	synaptic vesicle glycoprotein 2C [Source:NCBI gene;Acc:100517268]
TP53INP1	ENSSSCG00000034321	tumor protein p53 inducible nuclear protein 1 [Source:NCBI gene;Acc:100157451]
	ENSSSCG00000034664	megakaryocyte and platelet inhibitory receptor G6b [Source:NCBI gene;Acc:110261494]
ARMCX4	ENSSSCG00000034821	armadillo repeat containing X-linked 4 [Source:NCBI gene;Acc:110257665]
CHP2	ENSSSCG00000034827	calcineurin like EF-hand protein 2 [Source:NCBI gene;Acc:102163757]
	ENSSSCG00000034866	transforming acidic coiled-coil-containing protein 1 [Source:NCBI gene;Acc:106506226]
RASSF9	ENSSSCG00000034948	Ras association domain family member 9 [Source:NCBI gene;Acc:110260805]
ISG12(A)	ENSSSCG00000035297	putative ISG12(a) protein [Source:NCBI gene;Acc:100153902]
FGL1	ENSSSCG00000035335	fibrinogen like 1 [Source:NCBI gene;Acc:100516651]
IGFBP2	ENSSSCG00000035392	insulin like growth factor binding protein 2 [Source:NCBI gene;Acc:397064]
	ENSSSCG00000035960	CMRF35-like molecule 6 [Source:NCBI gene;Acc:102159509]
	ENSSSCG00000036155	FAT atypical cadherin 4 [Source:NCBI gene;Acc:100622618]
ZNF250	ENSSSCG00000036160	zinc finger protein 250 [Source:NCBI gene;Acc:100621388]
OAF	ENSSSCG00000036307	out at first homolog [Source:NCBI gene;Acc:100522940]
	ENSSSCG00000036342	adhesion G protein-coupled receptor E2-like [Source:NCBI gene;Acc:100518417]
	ENSSSCG00000036465	USP6 N-terminal-like protein [Source:NCBI gene;Acc:110258908]
	ENSSSCG00000036516	protocadherin beta-4 [Source:NCBI gene;Acc:100521779]
TNFSF13	ENSSSCG00000036521	TNF superfamily member 13 [Source:NCBI gene;Acc:100127162]
	ENSSSCG00000036726	leucine carboxyl methyltransferase 1 [Source:NCBI gene;Acc:100626661]
	ENSSSCG00000037396
CLIC5	ENSSSCG00000037416	chloride intracellular channel 5 [Source:NCBI gene;Acc:100154589]
	ENSSSCG00000037981
	ENSSSCG00000038135	SH2 domain-containing protein 4A-like [Source:NCBI gene;Acc:100737676]
SERPINF2	ENSSSCG00000038745	serpin family F member 2 [Source:NCBI gene;Acc:100525254]
	ENSSSCG00000038757	thiosulfate sulfurtransferase like domain containing 3 [Source:NCBI gene;Acc:100514380]
HOXC4	ENSSSCG00000038993	homeobox C4 [Source:NCBI gene;Acc:100154759]
	ENSSSCG00000039339	neuroblastoma breakpoint family member 6-like [Source:NCBI gene;Acc:100737336]
SERPINH1	ENSSSCG00000039468	serpin family H member 1 [Source:NCBI gene;Acc:396773]
ZBTB25	ENSSSCG00000039616	zinc finger and BTB domain containing 25 [Source:NCBI gene;Acc:110261686]
	ENSSSCG00000039685
PRL	ENSSSCG00000039721	prolactin [Source:NCBI gene;Acc:396965]
ASIC2	ENSSSCG00000040177	acid sensing ion channel subunit 2 [Source:NCBI gene;Acc:100628008]
TTC29	ENSSSCG00000040272	tetratricopeptide repeat domain 29 [Source:NCBI gene;Acc:100627237]
	ENSSSCG00000040315	protocadherin gamma-A7-like [Source:NCBI gene;Acc:110259517]
LIMD2	ENSSSCG00000040509	LIM domain containing 2 [Source:NCBI gene;Acc:100512735]
CCL8	ENSSSCG00000040648	chemokine (C-C motif) ligand 8 [Source:NCBI gene;Acc:100302703]
LRP2	ENSSSCG00000040746	LDL receptor related protein 2 [Source:NCBI gene;Acc:100519689]
	ENSSSCG00000000194	tubulin alpha-1C chain [Source:NCBI gene;Acc:100127131]
SUOX	ENSSSCG00000000376	sulfite oxidase [Source:NCBI gene;Acc:100625272]
ANKRD52	ENSSSCG00000000386	ankyrin repeat domain 52 [Source:NCBI gene;Acc:100519313]
NAB2	ENSSSCG00000000411	NGFI-A binding protein 2 [Source:NCBI gene;Acc:100157578]
XPOT	ENSSSCG00000000466	exportin for tRNA [Source:NCBI gene;Acc:100511016]
	ENSSSCG00000000530	FYVE, RhoGEF and PH domain containing 4 [Source:NCBI gene;Acc:100623278]
COPS7A	ENSSSCG00000000691	COP9 signalosome subunit 7A [Source:NCBI gene;Acc:100157341]
GAPDH	ENSSSCG00000000694	glyceraldehyde-3-phosphate dehydrogenase [Source:NCBI gene;Acc:396823]
PLEKHG6	ENSSSCG00000000709	pleckstrin homology and RhoGEF domain containing G6 [Source:NCBI gene;Acc:100520565]
RHNO1	ENSSSCG00000000738	RAD9-HUS1-RAD1 interacting nuclear orphan 1 [Source:NCBI gene;Acc:100511381]
ADIPOR2	ENSSSCG00000000757	adiponectin receptor 2 [Source:NCBI gene;Acc:404694]
ALDH1L2	ENSSSCG00000000839	aldehyde dehydrogenase 1 family member L2 [Source:NCBI gene;Acc:100151976]
ARL1	ENSSSCG00000000870	ADP ribosylation factor like GTPase 1 [Source:NCBI gene;Acc:595113]
PLXNC1	ENSSSCG00000000907	plexin C1 [Source:NCBI gene;Acc:100519487]
SLC35B3	ENSSSCG00000001033	solute carrier family 35 member B3 [Source:NCBI gene;Acc:100157111]
DTNBP1	ENSSSCG00000001062	dystrobrevin binding protein 1 [Source:NCBI gene;Acc:100049697]
TPMT	ENSSSCG00000001073	thiopurine S-methyltransferase [Source:NCBI gene;Acc:100157630]
GABBR1	ENSSSCG00000001242	gamma-aminobutyric acid type B receptor subunit 1 [Source:NCBI gene;Acc:100141417]
VARS2	ENSSSCG00000001384	valyl-tRNA synthetase 2, mitochondrial [Source:NCBI gene;Acc:100144457]
HLA-DRA	ENSSSCG00000001453	MHC class II DR-alpha [Source:NCBI gene;Acc:100135040]
ITPR3	ENSSSCG00000001518	inositol 1,4,5-trisphosphate receptor type 3 [Source:NCBI gene;Acc:100155015]
FANCE	ENSSSCG00000001546	FA complementation group E [Source:HGNC Symbol;Acc:HGNC:3586]
PIM1	ENSSSCG00000001573	Pim-1 proto-oncogene, serine/threonine kinase [Source:NCBI gene;Acc:100157844]
NFYA	ENSSSCG00000001611	nuclear transcription factor Y subunit alpha [Source:NCBI gene;Acc:100151920]
	ENSSSCG00000001658	mitochondrial ribosomal protein L2 [Source:NCBI gene;Acc:100151914]
TMEM63B	ENSSSCG00000001697	transmembrane protein 63B [Source:NCBI gene;Acc:100151872]
IREB2	ENSSSCG00000001756	iron responsive element binding protein 2 [Source:NCBI gene;Acc:100153993]
IQGAP1	ENSSSCG00000001814	IQ motif containing GTPase activating protein 1 [Source:NCBI gene;Acc:100157656]
RCN2	ENSSSCG00000001866	reticulocalbin 2 [Source:NCBI gene;Acc:100153840]
ARID3B	ENSSSCG00000001905	AT-rich interaction domain 3B [Source:NCBI gene;Acc:100521805]
PLEKHG3	ENSSSCG00000002276	pleckstrin homology and RhoGEF domain containing G3 [Source:NCBI gene;Acc:100155870]
ZFYVE26	ENSSSCG00000002298	zinc finger FYVE-type containing 26 [Source:NCBI gene;Acc:100155869]
MLH3	ENSSSCG00000002378	acylphosphatase 1 [Source:NCBI gene;Acc:100155997]
GPATCH2L	ENSSSCG00000002387	G-patch domain containing 2 like [Source:NCBI gene;Acc:100153141]
SERPINA12	ENSSSCG00000002478	serpin A12 [Source:NCBI gene;Acc:106504546]
CLMN	ENSSSCG00000002494	calmin [Source:NCBI gene;Acc:100511700]
FBXO9	ENSSSCG00000002629	F-box protein 9 [Source:NCBI gene;Acc:100152568]
MTHFSD	ENSSSCG00000002660	methenyltetrahydrofolate synthetase domain containing [Source:NCBI gene;Acc:100511815]
SALL1	ENSSSCG00000002836	spalt like transcription factor 1 [Source:NCBI gene;Acc:100519899]
ITPKC	ENSSSCG00000003000	inositol-trisphosphate 3-kinase C [Source:NCBI gene;Acc:100524376]
TGFB1	ENSSSCG00000003017	transforming growth factor beta 1 [Source:NCBI gene;Acc:397078]
	ENSSSCG00000003042	ribosomal protein S19 [Source:NCBI gene;Acc:100518254]
	ENSSSCG00000003090	nectin cell adhesion molecule 2 [Source:NCBI gene;Acc:100038012]
SYMPK	ENSSSCG00000003093	symplekin [Source:NCBI gene;Acc:100512609]
GRWD1	ENSSSCG00000003134	glutamate rich WD repeat containing 1 [Source:NCBI gene;Acc:100521273]
PEG3	ENSSSCG00000003326	paternally expressed 3 [Source:NCBI gene;Acc:100522552]
CTRC	ENSSSCG00000003458	EF-hand domain family member D2 [Source:NCBI gene;Acc:100520743]
LDLRAP1	ENSSSCG00000003549	low density lipoprotein receptor adaptor protein 1 [Source:NCBI gene;Acc:100125967]
WASF2	ENSSSCG00000003577	WASP family member 2 [Source:NCBI gene;Acc:100512789]
COL16A1	ENSSSCG00000003603	collagen type XVI alpha 1 chain [Source:NCBI gene;Acc:100737666]
EMILIN2	ENSSSCG00000003694	elastin microfibril interfacer 2 [Source:NCBI gene;Acc:100522875]
SSX2IP	ENSSSCG00000003757	SSX family member 2 interacting protein [Source:NCBI gene;Acc:100522497]
TACSTD2	ENSSSCG00000003832	tumor associated calcium signal transducer 2 [Source:NCBI gene;Acc:100510966]
MOB3C	ENSSSCG00000003897	MOB kinase activator 3C [Source:NCBI gene;Acc:100738460]
	ENSSSCG00000003919	mutY DNA glycosylase [Source:NCBI gene;Acc:100513867]
PLK3	ENSSSCG00000003928	polo like kinase 3 [Source:NCBI gene;Acc:397250]
	ENSSSCG00000003989
ZNF606	ENSSSCG00000003995	zinc finger protein 606 [Source:NCBI gene;Acc:102158443]
THBS2	ENSSSCG00000004012	thrombospondin 2 [Source:NCBI gene;Acc:100153940]
FBXO30	ENSSSCG00000004121	EPM2A glucan phosphatase, laforin [Source:NCBI gene;Acc:100153341]
STX11	ENSSSCG00000004125	syntaxin 11 [Source:NCBI gene;Acc:100152253]
PDE7B	ENSSSCG00000004165	phosphodiesterase 7B [Source:NCBI gene;Acc:100037969]
EPB41L2	ENSSSCG00000004199	erythrocyte membrane protein band 4.1 like 2 [Source:NCBI gene;Acc:100524836]
RSPO3	ENSSSCG00000004218	R-spondin 3 [Source:NCBI gene;Acc:100155208]
	ENSSSCG00000004253	golgi associated PDZ and coiled-coil motif containing [Source:NCBI gene;Acc:100520524]
OGFRL1	ENSSSCG00000004279	opioid growth factor receptor like 1 [Source:NCBI gene;Acc:100153138]
PM20D2	ENSSSCG00000004314	peptidase M20 domain containing 2 [Source:NCBI gene;Acc:100157591]
QRSL1	ENSSSCG00000004374	glutaminyl-tRNA amidotransferase subunit QRSL1 [Source:NCBI gene;Acc:100627457]
OSTM1	ENSSSCG00000004383	osteoclastogenesis associated transmembrane protein 1 [Source:NCBI gene;Acc:100049681]
DDO	ENSSSCG00000004401	D-aspartate oxidase [Source:NCBI gene;Acc:100037287]
LAMA4	ENSSSCG00000004425	laminin subunit alpha 4 [Source:NCBI gene;Acc:100154581]
PRSS35	ENSSSCG00000004452	serine protease 35 [Source:NCBI gene;Acc:100156168]
TPBG	ENSSSCG00000004458	trophoblast glycoprotein [Source:NCBI gene;Acc:100158028]
COL12A1	ENSSSCG00000004484	collagen type XII alpha 1 chain [Source:NCBI gene;Acc:100156689]
SETBP1	ENSSSCG00000004490	SET binding protein 1 [Source:NCBI gene;Acc:100153027]
SMAD7	ENSSSCG00000004507	SMAD family member 7 [Source:NCBI gene;Acc:100521305]
LACTB	ENSSSCG00000004569	lactamase beta [Source:NCBI gene;Acc:100152773]
GNB5	ENSSSCG00000004622	G protein subunit beta 5 [Source:NCBI gene;Acc:100157949]
GALK2	ENSSSCG00000004651	fibroblast growth factor 7 [Source:NCBI gene;Acc:397281]
FBN1	ENSSSCG00000004658	fibrillin 1 [Source:NCBI gene;Acc:414836]
LRRC57	ENSSSCG00000004726	leucine rich repeat containing 57 [Source:NCBI gene;Acc:100513451]
SPINT1	ENSSSCG00000004759	serine peptidase inhibitor, Kunitz type 1 [Source:NCBI gene;Acc:100157387]
CHSY1	ENSSSCG00000004825	chondroitin sulfate synthase 1 [Source:NCBI gene;Acc:100520288]
NDN	ENSSSCG00000004834	necdin, MAGE family member [Source:NCBI gene;Acc:100144475]
CLPX	ENSSSCG00000004927	caseinolytic mitochondrial matrix peptidase chaperone subunit X [Source:NCBI gene;Acc:100151784]
DPP8	ENSSSCG00000004934	dipeptidyl peptidase 8 [Source:NCBI gene;Acc:100155833]
DIS3L	ENSSSCG00000004941	DIS3 like exosome 3'-5' exoribonuclease [Source:NCBI gene;Acc:100515640]
LARP6	ENSSSCG00000004974	La ribonucleoprotein 6, translational regulator [Source:NCBI gene;Acc:100522415]
SAV1	ENSSSCG00000005021	salvador family WW domain containing protein 1 [Source:NCBI gene;Acc:100156165]
DENND4C	ENSSSCG00000005170	DENN domain containing 4C [Source:NCBI gene;Acc:100154094]
KDM4C	ENSSSCG00000005198	lysine demethylase 4C [Source:NCBI gene;Acc:100622077]
DCAF10	ENSSSCG00000005356	DDB1 and CUL4 associated factor 10 [Source:NCBI gene;Acc:100157661]
NCBP1	ENSSSCG00000005366	nuclear cap binding protein subunit 1 [Source:NCBI gene;Acc:106509205]
INVS	ENSSSCG00000005388	inversin [Source:NCBI gene;Acc:100155489]
MSANTD3-TMEFF1	ENSSSCG00000005391	Myb/SANT DNA binding domain containing 3 [Source:NCBI gene;Acc:100513775]
MEGF9	ENSSSCG00000005506	multiple EGF like domains 9 [Source:NCBI gene;Acc:100157028]
DENND1A	ENSSSCG00000005585	DENN domain containing 1A [Source:NCBI gene;Acc:102166001]
LRRC8A	ENSSSCG00000005664	leucine rich repeat containing 8 VRAC subunit A [Source:NCBI gene;Acc:100157556]
VAV2	ENSSSCG00000005743	vav guanine nucleotide exchange factor 2 [Source:NCBI gene;Acc:100151931]
RNF208	ENSSSCG00000005858	ring finger protein 208 [Source:NCBI gene;Acc:100515466]
LRP12	ENSSSCG00000006039	LDL receptor related protein 12 [Source:NCBI gene;Acc:100154103]
CTHRC1	ENSSSCG00000006051	collagen triple helix repeat containing 1 [Source:NCBI gene;Acc:100152510]
RNF19A	ENSSSCG00000006066	ring finger protein 19A, RBR E3 ubiquitin protein ligase [Source:NCBI gene;Acc:654326]
RIDA	ENSSSCG00000006079	reactive intermediate imine deaminase A homolog [Source:NCBI gene;Acc:100158002]
DECR1	ENSSSCG00000006126	2,4-dienoyl-CoA reductase 1 [Source:NCBI gene;Acc:503544]
RCSD1	ENSSSCG00000006307	RCSD domain containing 1 [Source:NCBI gene;Acc:100152372]
DEDD	ENSSSCG00000006365	death effector domain containing [Source:NCBI gene;Acc:100156474]
LMNA	ENSSSCG00000006496	lamin A/C [Source:NCBI gene;Acc:100126859]
	ENSSSCG00000006525	mucin 1, cell surface associated [Source:NCBI gene;Acc:397382]
CHD1L	ENSSSCG00000006701	chromodomain helicase DNA binding protein 1 like [Source:NCBI gene;Acc:100154153]
RTCA	ENSSSCG00000006865	RNA 3'-terminal phosphate cyclase [Source:NCBI gene;Acc:100154102]
ARHGAP29	ENSSSCG00000006889	Rho GTPase activating protein 29 [Source:NCBI gene;Acc:100152734]
SLC7A2	ENSSSCG00000006987	solute carrier family 7 member 2 [Source:NCBI gene;Acc:100037298]
SLC20A2	ENSSSCG00000007027	solute carrier family 20 member 2 [Source:NCBI gene;Acc:100738984]
PSD3	ENSSSCG00000007034	pleckstrin and Sec7 domain containing 3 [Source:NCBI gene;Acc:100623956]
MGME1	ENSSSCG00000007089	mitochondrial genome maintenance exonuclease 1 [Source:NCBI gene;Acc:100738618]
	ENSSSCG00000007188	FKBP prolyl isomerase 1A [Source:NCBI gene;Acc:654323]
MYBL2	ENSSSCG00000007366	MYB proto-oncogene like 2 [Source:NCBI gene;Acc:100157175]
SLC9A8	ENSSSCG00000007466	solute carrier family 9 member A8 [Source:NCBI gene;Acc:102158489]
TFAP2C	ENSSSCG00000007499	transcription factor AP-2 gamma [Source:NCBI gene;Acc:100144525]
VAPB	ENSSSCG00000007514	VAMP associated protein B and C [Source:NCBI gene;Acc:100144536]
TUBB1	ENSSSCG00000007523	tubulin beta 1 class VI [Source:NCBI gene;Acc:100134983]
TBC1D10B	ENSSSCG00000007798	TBC1 domain family member 10B [Source:NCBI gene;Acc:100514343]
PARN	ENSSSCG00000007878	poly(A)-specific ribonuclease [Source:NCBI gene;Acc:100515887]
HAGHL	ENSSSCG00000008003	hydroxyacylglutathione hydrolase like [Source:NCBI gene;Acc:100525741]
ASPN	ENSSSCG00000008072	asporin [Source:NCBI gene;Acc:100511749]
MAL	ENSSSCG00000008115	mal, T cell differentiation protein [Source:NCBI gene;Acc:100521617]
FHL2	ENSSSCG00000008147	four and a half LIM domains 2 [Source:NCBI gene;Acc:100513532]
EIF2AK3	ENSSSCG00000008208	eukaryotic translation initiation factor 2 alpha kinase 3 [Source:NCBI gene;Acc:100513348]
GFPT1	ENSSSCG00000008339	glutamine--fructose-6-phosphate transaminase 1 [Source:NCBI gene;Acc:397209]
RAB1A	ENSSSCG00000008359	RAB1A, member RAS oncogene family [Source:NCBI gene;Acc:595116]
	ENSSSCG00000008383	activator of HSP90 ATPase homolog 2, pseudogene [Source:NCBI gene;Acc:110260004]
ERLEC1	ENSSSCG00000008414	endoplasmic reticulum lectin 1 [Source:NCBI gene;Acc:100517335]
MSH2	ENSSSCG00000008428	mutS homolog 2 [Source:NCBI gene;Acc:100337661]
PLEKHH2	ENSSSCG00000008456	pleckstrin homology, MyTH4 and FERM domain containing H2 [Source:NCBI gene;Acc:100512894]
DHX57	ENSSSCG00000008479	DExH-box helicase 57 [Source:NCBI gene;Acc:100520373]
QPCT	ENSSSCG00000008491	glutaminyl-peptide cyclotransferase [Source:NCBI gene;Acc:397424]
ZNF512	ENSSSCG00000008545	zinc finger protein 512 [Source:NCBI gene;Acc:100521129]
SDC1	ENSSSCG00000008601	syndecan 1 [Source:NCBI gene;Acc:100519770]
OSR1	ENSSSCG00000008606	odd-skipped related transcription factor 1 [Source:NCBI gene;Acc:100520131]
NWD2	ENSSSCG00000008770	NACHT and WD repeat domain containing 2 [Source:NCBI gene;Acc:100522449]
KLHL5	ENSSSCG00000008787	kelch like family member 5 [Source:NCBI gene;Acc:100739193]
GUCY1A1	ENSSSCG00000008866	guanylate cyclase 1 soluble subunit alpha 1 [Source:NCBI gene;Acc:553100]
CLOCK	ENSSSCG00000008909	clock circadian regulator [Source:NCBI gene;Acc:100628097]
JADE1	ENSSSCG00000009071	jade family PHD finger 1 [Source:NCBI gene;Acc:100516328]
SPATA5	ENSSSCG00000009084	spermatogenesis associated 5 [Source:NCBI gene;Acc:100415805]
BBS7	ENSSSCG00000009093	Bardet-Biedl syndrome 7 [Source:HGNC Symbol;Acc:HGNC:18758]
	ENSSSCG00000009125	ankyrin 2 [Source:NCBI gene;Acc:100512728]
AP1AR	ENSSSCG00000009128	family with sequence similarity 241 member A [Source:NCBI gene;Acc:102158861]
MCUB	ENSSSCG00000009141	mitochondrial calcium uniporter dominant negative subunit beta [Source:NCBI gene;Acc:100623186]
SPP1	ENSSSCG00000009216	secreted phosphoprotein 1 [Source:NCBI gene;Acc:397087]
KLHL8	ENSSSCG00000009226	kelch like family member 8 [Source:NCBI gene;Acc:100521566]
WASF3	ENSSSCG00000009300	WASP family member 3 [Source:NCBI gene;Acc:100155782]
MEDAG	ENSSSCG00000009331	mesenteric estrogen dependent adipogenesis [Source:NCBI gene;Acc:100153765]
	ENSSSCG00000009338	FRY microtubule binding protein [Source:NCBI gene;Acc:100155799]
POSTN	ENSSSCG00000009361	periostin [Source:NCBI gene;Acc:100152401]
ALG11	ENSSSCG00000009381	ALG11 alpha-1,2-mannosyltransferase [Source:NCBI gene;Acc:100152645]
LRCH1	ENSSSCG00000009408	leucine rich repeats and calponin homology domain containing 1 [Source:NCBI gene;Acc:100521036]
UGGT2	ENSSSCG00000009502	UDP-glucose glycoprotein glucosyltransferase 2 [Source:NCBI gene;Acc:100154594]
PCCA	ENSSSCG00000009522	propionyl-CoA carboxylase subunit alpha [Source:NCBI gene;Acc:100524103]
ITGBL1	ENSSSCG00000009526	integrin subunit beta like 1 [Source:NCBI gene;Acc:100525532]
GRK3	ENSSSCG00000009956	G protein-coupled receptor kinase 3 [Source:NCBI gene;Acc:100156449]
NTPCR	ENSSSCG00000010166	nucleoside-triphosphatase, cancer-related [Source:NCBI gene;Acc:100152811]
AGT	ENSSSCG00000010184	angiotensinogen [Source:NCBI gene;Acc:100157073]
	ENSSSCG00000010212	ankyrin 3 [Source:NCBI gene;Acc:100154687]
KIFBP	ENSSSCG00000010248	kinesin family binding protein [Source:NCBI gene;Acc:100151916]
PPA1	ENSSSCG00000010261	inorganic pyrophosphatase 1 [Source:NCBI gene;Acc:100155201]
PSAP	ENSSSCG00000010281	prosaposin [Source:NCBI gene;Acc:100153167]
ZMIZ1	ENSSSCG00000010329	zinc finger MIZ-type containing 1 [Source:NCBI gene;Acc:100153816]
PRXL2A	ENSSSCG00000010340	peroxiredoxin like 2A [Source:NCBI gene;Acc:100155717]
VSTM4	ENSSSCG00000010385	V-set and transmembrane domain containing 4 [Source:NCBI gene;Acc:100157009]
MSMB	ENSSSCG00000010400	microseminoprotein beta [Source:NCBI gene;Acc:396852]
	ENSSSCG00000010401	WASH complex subunit 2A [Source:NCBI gene;Acc:100522401]
PLCE1	ENSSSCG00000010483	phospholipase C epsilon 1 [Source:NCBI gene;Acc:100157745]
PIK3AP1	ENSSSCG00000010509	phosphoinositide-3-kinase adaptor protein 1 [Source:NCBI gene;Acc:100155165]
LOXL4	ENSSSCG00000010532	lysyl oxidase like 4 [Source:NCBI gene;Acc:100157207]
NT5C2	ENSSSCG00000010594	5'-nucleotidase, cytosolic II [Source:NCBI gene;Acc:100154612]
COL17A1	ENSSSCG00000010607	collagen type XVII alpha 1 chain [Source:NCBI gene;Acc:414914]
DCLRE1A	ENSSSCG00000010644	DNA cross-link repair 1A [Source:NCBI gene;Acc:100156734]
ATRNL1	ENSSSCG00000010654	attractin like 1 [Source:NCBI gene;Acc:100157106]
ACADSB	ENSSSCG00000010723	acyl-CoA dehydrogenase short/branched chain [Source:NCBI gene;Acc:100154810]
EDRF1	ENSSSCG00000010741	erythroid differentiation regulatory factor 1 [Source:NCBI gene;Acc:100522106]
ADAM12	ENSSSCG00000010746	ADAM metallopeptidase domain 12 [Source:NCBI gene;Acc:100157228]
CLRN3	ENSSSCG00000010753	clarin 3 [Source:NCBI gene;Acc:100156267]
PALB2	ENSSSCG00000010794	partner and localizer of BRCA2 [Source:NCBI gene;Acc:100523630]
EPRS1	ENSSSCG00000010821	glutamyl-prolyl-tRNA synthetase 1 [Source:NCBI gene;Acc:449526]
PSEN2	ENSSSCG00000010860	presenilin 2 [Source:NCBI gene;Acc:780410]
ELF3	ENSSSCG00000010922	E74 like ETS transcription factor 3 [Source:NCBI gene;Acc:100524949]
NOL6	ENSSSCG00000010990	nucleolar protein 6 [Source:NCBI gene;Acc:100511276]
MLLT10	ENSSSCG00000011085	MLLT10 histone lysine methyltransferase DOT1L cofactor [Source:NCBI gene;Acc:100521678]
CREM	ENSSSCG00000011106	cAMP responsive element modulator [Source:NCBI gene;Acc:100512363]
METTL6	ENSSSCG00000011190	methyltransferase like 6 [Source:NCBI gene;Acc:100517369]
WDR48	ENSSSCG00000011261	WD repeat domain 48 [Source:NCBI gene;Acc:100518629]
CDCP1	ENSSSCG00000011298	CUB domain containing protein 1 [Source:NCBI gene;Acc:100512497]
NEK4	ENSSSCG00000011446	NIMA related kinase 4 [Source:NCBI gene;Acc:106504146]
SFMBT1	ENSSSCG00000011454	Scm like with four mbt domains 1 [Source:NCBI gene;Acc:100152413]
EIF4E3	ENSSSCG00000011516	eukaryotic translation initiation factor 4E family member 3 [Source:NCBI gene;Acc:100525891]
PDZRN3	ENSSSCG00000011521	PDZ domain containing ring finger 3 [Source:NCBI gene;Acc:100511410]
LMCD1	ENSSSCG00000011538	LIM and cysteine rich domains 1 [Source:NCBI gene;Acc:494020]
SLC6A6	ENSSSCG00000011600	solute carrier family 6 member 6 [Source:NCBI gene;Acc:106504129]
COPB2	ENSSSCG00000011662	COPI coat complex subunit beta 2 [Source:NCBI gene;Acc:100156939]
ATR	ENSSSCG00000011679	ATR serine/threonine kinase [Source:NCBI gene;Acc:100516227]
PAQR9	ENSSSCG00000011683	procollagen C-endopeptidase enhancer 2 [Source:NCBI gene;Acc:100156529]
PLSCR4	ENSSSCG00000011690	phospholipid scramblase 4 [Source:NCBI gene;Acc:100518400]
MBNL1	ENSSSCG00000011720	muscleblind like splicing regulator 1 [Source:NCBI gene;Acc:100525306]
MAP3K13	ENSSSCG00000011791	mitogen-activated protein kinase kinase kinase 13 [Source:NCBI gene;Acc:100515448]
TBCCD1	ENSSSCG00000011797	TBCC domain containing 1 [Source:NCBI gene;Acc:100154090]
	ENSSSCG00000011798	DnaJ heat shock protein family (Hsp40) member B11 [Source:NCBI gene;Acc:100152894]
	ENSSSCG00000011821	ATPase 13A4 [Source:NCBI gene;Acc:100157346]
	ENSSSCG00000011850	mucin 4, cell surface associated [Source:NCBI gene;Acc:100157344]
CD86	ENSSSCG00000011877	CD86 molecule [Source:NCBI gene;Acc:397441]
ATP5PO	ENSSSCG00000012042	ATP synthase peripheral stalk subunit OSCP [Source:NCBI gene;Acc:733678]
	ENSSSCG00000012074	beta-secretase 2 [Source:NCBI gene;Acc:100517374]
ARHGAP6	ENSSSCG00000012112	Rho GTPase activating protein 6 [Source:NCBI gene;Acc:100524780]
VEGFD	ENSSSCG00000012135	vascular endothelial growth factor D [Source:NCBI gene;Acc:100155670]
	ENSSSCG00000012238	tetraspanin 7 [Source:NCBI gene;Acc:100526026]
PDZD11	ENSSSCG00000012378	PDZ domain containing 11 [Source:NCBI gene;Acc:414386]
FOXO4	ENSSSCG00000012399	forkhead box O4 [Source:NCBI gene;Acc:733705]
ATP7A	ENSSSCG00000012437	ATPase copper transporting alpha [Source:NCBI gene;Acc:397159]
	ENSSSCG00000012452	SH3 domain binding glutamate rich protein like [Source:NCBI gene;Acc:100520772]
DIAPH2	ENSSSCG00000012474	diaphanous related formin 2 [Source:NCBI gene;Acc:100155257]
TMEM35A	ENSSSCG00000012490	transmembrane protein 35A [Source:NCBI gene;Acc:100516714]
NXT2	ENSSSCG00000012581	nuclear transport factor 2 like export factor 2 [Source:NCBI gene;Acc:100521422]
MAMLD1	ENSSSCG00000012741	mastermind like domain containing 1 [Source:NCBI gene;Acc:100517073]
	ENSSSCG00000012757	centrin 2 [Source:NCBI gene;Acc:606742]
NSDHL	ENSSSCG00000012758	NAD(P) dependent steroid dehydrogenase-like [Source:NCBI gene;Acc:100157894]
SLC6A8	ENSSSCG00000012771	solute carrier family 6 member 8 [Source:NCBI gene;Acc:100302506]
BRCC3	ENSSSCG00000012813	BRCA1/BRCA2-containing complex subunit 3 [Source:NCBI gene;Acc:100516948]
	ENSSSCG00000012915	cardiotrophin like cytokine factor 1 [Source:NCBI gene;Acc:100513263]
MACROD1	ENSSSCG00000013043	mono-ADP ribosylhydrolase 1 [Source:NCBI gene;Acc:100522538]
MPEG1	ENSSSCG00000013144	macrophage expressed 1 [Source:NCBI gene;Acc:100516953]
DTX4	ENSSSCG00000013145	deltex E3 ubiquitin ligase 4 [Source:NCBI gene;Acc:100517143]
	ENSSSCG00000013318	reticulocalbin 1 [Source:NCBI gene;Acc:100516484]
COPB1	ENSSSCG00000013392	COPI coat complex subunit beta 1 [Source:NCBI gene;Acc:100337660]
SPON1	ENSSSCG00000013393	spondin 1 [Source:NCBI gene;Acc:100516954]
CFD	ENSSSCG00000013418	complement factor D [Source:NCBI gene;Acc:396877]
DOT1L	ENSSSCG00000013457	DOT1 like histone lysine methyltransferase [Source:NCBI gene;Acc:100738665]
	ENSSSCG00000013753
PRKACA	ENSSSCG00000013771	protein kinase cAMP-activated catalytic subunit alpha [Source:NCBI gene;Acc:397652]
AKAP8L	ENSSSCG00000013838	A-kinase anchoring protein 8 like [Source:NCBI gene;Acc:100518955]
GFPT2	ENSSSCG00000014012	glutamine-fructose-6-phosphate transaminase 2 [Source:NCBI gene;Acc:100518539]
TMED9	ENSSSCG00000014036	transmembrane p24 trafficking protein 9 [Source:NCBI gene;Acc:100511312]
JMY	ENSSSCG00000014112	junction mediating and regulatory protein, p53 cofactor [Source:NCBI gene;Acc:100510894]
ZFYVE16	ENSSSCG00000014121	zinc finger FYVE-type containing 16 [Source:NCBI gene;Acc:100511806]
RPS23	ENSSSCG00000014133	ribosomal protein S23 [Source:NCBI gene;Acc:396638]
VCAN	ENSSSCG00000014136	X-ray repair cross complementing 4 [Source:NCBI gene;Acc:100514895]
ERAP1	ENSSSCG00000014171	endoplasmic reticulum aminopeptidase 1 [Source:NCBI gene;Acc:100523953]
CSNK1G3	ENSSSCG00000014240	casein kinase 1 gamma 3 [Source:NCBI gene;Acc:100511866]
VDAC1	ENSSSCG00000014296	voltage dependent anion channel 1 [Source:NCBI gene;Acc:397010]
ABLIM3	ENSSSCG00000014430	actin binding LIM protein family member 3 [Source:NCBI gene;Acc:100515194]
TRIM22	ENSSSCG00000014670	tripartite motif protein TRIM5 [Source:NCBI gene;Acc:733579]
NOX4	ENSSSCG00000014927	NADPH oxidase 4 [Source:NCBI gene;Acc:100523323]
	ENSSSCG00000014997	caspase-13 [Source:NCBI gene;Acc:100522887]
AASDHPPT	ENSSSCG00000014998	aminoadipate-semialdehyde dehydrogenase-phosphopantetheinyl transferase [Source:NCBI gene;Acc:100525064]
POGLUT3	ENSSSCG00000015009	KDEL motif-containing protein 2 [Source:NCBI gene;Acc:100512977]
ABCG4	ENSSSCG00000015113	ATP binding cassette subfamily G member 4 [Source:NCBI gene;Acc:100518504]
PLEKHA6	ENSSSCG00000015281	pleckstrin homology domain containing A6 [Source:NCBI gene;Acc:100512182]
DYNC1I1	ENSSSCG00000015335	dynein cytoplasmic 1 intermediate chain 1 [Source:NCBI gene;Acc:100523985]
GLCCI1	ENSSSCG00000015345	glucocorticoid induced 1 [Source:NCBI gene;Acc:100511149]
SCIN	ENSSSCG00000015353	scinderin [Source:NCBI gene;Acc:100512981]
CDCA7L	ENSSSCG00000015380	cell division cycle associated 7 like [Source:NCBI gene;Acc:100518624]
	ENSSSCG00000015390	ATP-binding cassette, sub-family B (MDR/TAP), member 1 [Source:NCBI gene;Acc:396910]
NRCAM	ENSSSCG00000015445	neuronal cell adhesion molecule [Source:NCBI gene;Acc:100520970]
NCF2	ENSSSCG00000015559	neutrophil cytosolic factor 2 [Source:NCBI gene;Acc:100142665]
RGL1	ENSSSCG00000015563	ral guanine nucleotide dissociation stimulator like 1 [Source:NCBI gene;Acc:100515847]
PTPN14	ENSSSCG00000015582	protein tyrosine phosphatase non-receptor type 14 [Source:NCBI gene;Acc:100521917]
RPS6KC1	ENSSSCG00000015586	ribosomal protein S6 kinase C1 [Source:NCBI gene;Acc:100522456]
R3HDM1	ENSSSCG00000015692	R3H domain containing 1 [Source:NCBI gene;Acc:100525081]
RAB3GAP1	ENSSSCG00000015695	RAB3 GTPase activating protein catalytic subunit 1 [Source:NCBI gene;Acc:100152771]
ANGPT2	ENSSSCG00000015753	angiopoietin 2 [Source:NCBI gene;Acc:396730]
	ENSSSCG00000015814	transforming acidic coiled-coil containing protein 1 [Source:NCBI gene;Acc:100624903]
	ENSSSCG00000015823	RAB11 family interacting protein 1 [Source:NCBI gene;Acc:100625212]
TNKS	ENSSSCG00000015851	tankyrase [Source:NCBI gene;Acc:100153228]
PLA2R1	ENSSSCG00000015885	phospholipase A2 receptor 1 [Source:NCBI gene;Acc:100622105]
FAP	ENSSSCG00000015896	fibroblast activation protein alpha [Source:NCBI gene;Acc:100736572]
DNAJC10	ENSSSCG00000016017	DnaJ heat shock protein family (Hsp40) member C10 [Source:NCBI gene;Acc:100523288]
COL5A2	ENSSSCG00000016035	collagen type V alpha 2 chain [Source:NCBI gene;Acc:397532]
HIBCH	ENSSSCG00000016049	3-hydroxyisobutyryl-CoA hydrolase [Source:NCBI gene;Acc:100514687]
STAT1	ENSSSCG00000016057	signal transducer and activator of transcription 1 [Source:NCBI gene;Acc:396655]
MYO1B	ENSSSCG00000016061	myosin IB [Source:NCBI gene;Acc:100517198]
C2orf69	ENSSSCG00000016086	chromosome 2 open reading frame 69 [Source:HGNC Symbol;Acc:HGNC:26799]
BZW1	ENSSSCG00000016094	basic leucine zipper and W2 domains 1 [Source:NCBI gene;Acc:100152909]
ORC2	ENSSSCG00000016098	origin recognition complex subunit 2 [Source:NCBI gene;Acc:106510112]
FZD7	ENSSSCG00000016111	frizzled class receptor 7 [Source:NCBI gene;Acc:100513691]
BMPR2	ENSSSCG00000016113	bone morphogenetic protein receptor type 2 [Source:NCBI gene;Acc:100127483]
CYP20A1	ENSSSCG00000016118	neurobeachin like 1 [Source:NCBI gene;Acc:100514254]
ZDBF2	ENSSSCG00000016130	zinc finger DBF-type containing 2 [Source:NCBI gene;Acc:100157334]
BRAF	ENSSSCG00000016494	B-Raf proto-oncogene, serine/threonine kinase [Source:NCBI gene;Acc:100514612]
MKLN1	ENSSSCG00000016549	muskelin 1 [Source:NCBI gene;Acc:414428]
ATP6V1F	ENSSSCG00000016577	ATPase H+ transporting V1 subunit F [Source:NCBI gene;Acc:100518811]
CADPS2	ENSSSCG00000016611	calcium dependent secretion activator 2 [Source:NCBI gene;Acc:100525671]
HOXA7	ENSSSCG00000016701	homeobox A7 [Source:NCBI gene;Acc:100519456]
	ENSSSCG00000016737	peptidylprolyl isomerase A [Source:NCBI gene;Acc:397637]
STK17A	ENSSSCG00000016758	serine/threonine kinase 17a [Source:NCBI gene;Acc:100621897]
	ENSSSCG00000016768	M-phase specific PLK1 interacting protein [Source:NCBI gene;Acc:100518707]
NLN	ENSSSCG00000016778	neurolysin [Source:NCBI gene;Acc:397646]
MOCS2	ENSSSCG00000016888	molybdenum cofactor synthesis 2 [Source:NCBI gene;Acc:100512870]
BNIP1	ENSSSCG00000016985	BCL2 interacting protein 1 [Source:NCBI gene;Acc:100521935]
DUSP1	ENSSSCG00000016991	dual specificity phosphatase 1 [Source:NCBI gene;Acc:100522469]
CYTH1	ENSSSCG00000017167	cytohesin 1 [Source:NCBI gene;Acc:100515446]
C17orf80	ENSSSCG00000017246	chromosome 12 C17orf80 homolog [Source:NCBI gene;Acc:100517602]
PECAM1	ENSSSCG00000017277	platelet and endothelial cell adhesion molecule 1 [Source:NCBI gene;Acc:396941]
PLCD3	ENSSSCG00000017338	phospholipase C delta 3 [Source:NCBI gene;Acc:100521111]
KPNB1	ENSSSCG00000017514	karyopherin subunit beta 1 [Source:NCBI gene;Acc:100518449]
	ENSSSCG00000017643	septin 4 [Source:NCBI gene;Acc:100515575]
APPBP2	ENSSSCG00000017678	amyloid beta precursor protein binding protein 2 [Source:NCBI gene;Acc:100525889]
ADAP2	ENSSSCG00000017738	ArfGAP with dual PH domains 2 [Source:NCBI gene;Acc:100337675]
SERPINF1	ENSSSCG00000017818	serpin family F member 1 [Source:NCBI gene;Acc:780402]
ATP2A3	ENSSSCG00000017874	ATPase sarcoplasmic/endoplasmic reticulum Ca2+ transporting 3 [Source:NCBI gene;Acc:396820]
CYB5D2	ENSSSCG00000017876	neuferricin [Source:NCBI gene;Acc:100520452]
PFN1	ENSSSCG00000017907	profilin 1 [Source:NCBI gene;Acc:100512494]
YBX2	ENSSSCG00000017938	Y-box binding protein 2 [Source:NCBI gene;Acc:100519387]
MPDU1	ENSSSCG00000017955	mannose-P-dolichol utilization defect 1 [Source:NCBI gene;Acc:733696]
	ENSSSCG00000020706	carbonyl reductase [NADPH] 1-like [Source:NCBI gene;Acc:110256481]
FAM160A1	ENSSSCG00000020717	family with sequence similarity 160 member A1 [Source:NCBI gene;Acc:100627876]
GHSR	ENSSSCG00000020906	TNF superfamily member 10 [Source:NCBI gene;Acc:406191]
NRIP1	ENSSSCG00000021038	nuclear receptor interacting protein 1 [Source:NCBI gene;Acc:106505834]
S100A6	ENSSSCG00000021084	S100 calcium binding protein A6 [Source:NCBI gene;Acc:733608]
GRIPAP1	ENSSSCG00000021106	GRIP1 associated protein 1 [Source:NCBI gene;Acc:100621697]
BSPRY	ENSSSCG00000021173	B-box and SPRY domain containing [Source:NCBI gene;Acc:100622289]
	ENSSSCG00000021322	zinc finger protein X-linked [Source:NCBI gene;Acc:397294]
MCFD2	ENSSSCG00000021325	multiple coagulation factor deficiency 2, ER cargo receptor complex subunit [Source:NCBI gene;Acc:100736833]
	ENSSSCG00000021380	UBX domain protein 7 [Source:NCBI gene;Acc:100620692]
TRMT1L	ENSSSCG00000021393	tRNA methyltransferase 1 like [Source:NCBI gene;Acc:100518210]
	ENSSSCG00000021663	nucleolar protein 12 [Source:NCBI gene;Acc:100737940]
EGFR	ENSSSCG00000022126	epidermal growth factor receptor [Source:NCBI gene;Acc:397070]
CHURC1	ENSSSCG00000022147	churchill domain containing 1 [Source:NCBI gene;Acc:100514910]
ZNF251	ENSSSCG00000022161	zinc finger protein 251 [Source:NCBI gene;Acc:100738561]
HS6ST1	ENSSSCG00000022197	heparan sulfate 6-O-sulfotransferase 1 [Source:NCBI gene;Acc:100156717]
SYT17	ENSSSCG00000022200	synaptotagmin 17 [Source:NCBI gene;Acc:100513981]
CD9	ENSSSCG00000022230	CD9 molecule [Source:NCBI gene;Acc:397067]
ENO1	ENSSSCG00000022343	enolase 1 [Source:NCBI gene;Acc:100738870]
TBPL1	ENSSSCG00000022387	TATA-box binding protein like 1 [Source:NCBI gene;Acc:100517563]
	ENSSSCG00000022674	DAZ associated protein 2 [Source:NCBI gene;Acc:100196906]
	ENSSSCG00000022820
IFFO2	ENSSSCG00000022839	intermediate filament family orphan 2 [Source:NCBI gene;Acc:100737107]
CLMP	ENSSSCG00000022961	CXADR like membrane protein [Source:NCBI gene;Acc:100512427]
TBC1D8B	ENSSSCG00000022993	TBC1 domain family member 8B [Source:NCBI gene;Acc:100516411]
PKIG	ENSSSCG00000022998	cAMP-dependent protein kinase inhibitor gamma [Source:NCBI gene;Acc:397661]
IGF2BP1	ENSSSCG00000023128	insulin like growth factor 2 mRNA binding protein 1 [Source:NCBI gene;Acc:100620940]
EIF2B4	ENSSSCG00000023140	eukaryotic translation initiation factor 2B subunit delta [Source:HGNC Symbol;Acc:HGNC:3260]
CA4	ENSSSCG00000023186	carbonic anhydrase 4 [Source:NCBI gene;Acc:100511956]
PNRC2	ENSSSCG00000023326	proline rich nuclear receptor coactivator 2 [Source:NCBI gene;Acc:100625012]
	ENSSSCG00000023467	glutathione S-transferase A4 [Source:NCBI gene;Acc:100510917]
RPA3	ENSSSCG00000023886	replication protein A3 [Source:NCBI gene;Acc:100624116]
PPP1R11	ENSSSCG00000024259	protein phosphatase 1 regulatory inhibitor subunit 11 [Source:NCBI gene;Acc:100141423]
SERF2	ENSSSCG00000024263	small EDRK-rich factor 2 [Source:NCBI gene;Acc:100154963]
PDE4DIP	ENSSSCG00000024481	myomegalin [Source:NCBI gene;Acc:100624559]
PHLDB1	ENSSSCG00000024578	pleckstrin homology like domain family B member 1 [Source:NCBI gene;Acc:100623187]
PDGFC	ENSSSCG00000024960	platelet derived growth factor C [Source:NCBI gene;Acc:100515267]
NFU1	ENSSSCG00000025007	NFU1 iron-sulfur cluster scaffold [Source:NCBI gene;Acc:102165918]
DPF1	ENSSSCG00000025160	double PHD fingers 1 [Source:NCBI gene;Acc:100625938]
RNF39	ENSSSCG00000025208	ring finger protein 39 [Source:NCBI gene;Acc:100141418]
ILDR1	ENSSSCG00000025436	immunoglobulin like domain containing receptor 1 [Source:NCBI gene;Acc:100620323]
RPL27	ENSSSCG00000025507	ribosomal protein L27 [Source:NCBI gene;Acc:100037995]
ATM	ENSSSCG00000025606	ATM serine/threonine kinase [Source:NCBI gene;Acc:100101922]
COLEC11	ENSSSCG00000025629	collectin subfamily member 11 [Source:NCBI gene;Acc:100736753]
ACTR6	ENSSSCG00000025682	actin related protein 6 [Source:NCBI gene;Acc:100511382]
MCCC1	ENSSSCG00000025942	methylcrotonoyl-CoA carboxylase 1 [Source:NCBI gene;Acc:100624482]
	ENSSSCG00000026140	S100 calcium binding protein B [Source:NCBI gene;Acc:100623510]
VPS35	ENSSSCG00000026239	VPS35 retromer complex component [Source:NCBI gene;Acc:100623578]
STMN1	ENSSSCG00000026257	stathmin 1 [Source:NCBI gene;Acc:494463]
EPS8L1	ENSSSCG00000026417	EPS8 like 1 [Source:NCBI gene;Acc:100627336]
PROCR	ENSSSCG00000026585	protein C receptor [Source:NCBI gene;Acc:654289]
TAF9B	ENSSSCG00000026714	TATA-box binding protein associated factor 9b [Source:NCBI gene;Acc:100516658]
CEP85	ENSSSCG00000026731	centrosomal protein 85 [Source:NCBI gene;Acc:100621740]
NECTIN4	ENSSSCG00000026861	nectin cell adhesion molecule 4 [Source:NCBI gene;Acc:100154054]
CYP4F8	ENSSSCG00000027013	cytochrome P450 4F6-like [Source:NCBI gene;Acc:110255237]
PCBP1	ENSSSCG00000027224	poly(rC) binding protein 1 [Source:NCBI gene;Acc:100511501]
TNPO1	ENSSSCG00000027293	transportin 1 [Source:NCBI gene;Acc:100627484]
COL6A3	ENSSSCG00000027331	collagen type VI alpha 3 chain [Source:NCBI gene;Acc:100101551]
GCA	ENSSSCG00000027472	grancalcin [Source:NCBI gene;Acc:100736670]
SPAG1	ENSSSCG00000027587	sperm associated antigen 1 [Source:NCBI gene;Acc:100135664]
FOXP1	ENSSSCG00000027675	forkhead box P1 [Source:NCBI gene;Acc:100525716]
	ENSSSCG00000027741	zinc finger protein 665-like [Source:NCBI gene;Acc:100627241]
TOGARAM1	ENSSSCG00000027765	TOG array regulator of axonemal microtubules 1 [Source:NCBI gene;Acc:100513707]
SHLD2	ENSSSCG00000027767	shieldin complex subunit 2 [Source:NCBI gene;Acc:100625894]
C1orf115	ENSSSCG00000027882	chromosome 10 C1orf115 homolog [Source:NCBI gene;Acc:100516689]
	ENSSSCG00000028005	VPS33A core subunit of CORVET and HOPS complexes [Source:NCBI gene;Acc:100049702]
SNTB2	ENSSSCG00000028109	syntrophin beta 2 [Source:NCBI gene;Acc:100620497]
HOMEZ	ENSSSCG00000028190	homeobox and leucine zipper encoding [Source:NCBI gene;Acc:100155262]
XPO1	ENSSSCG00000028228	exportin 1 [Source:NCBI gene;Acc:397330]
	ENSSSCG00000028277	pancreatic alpha-amylase [Source:NCBI gene;Acc:100521789]
DR1	ENSSSCG00000028310	down-regulator of transcription 1 [Source:NCBI gene;Acc:100152776]
	ENSSSCG00000028322
	ENSSSCG00000028464	transmembrane protein 170A [Source:NCBI gene;Acc:100522740]
TNIK	ENSSSCG00000028905	TRAF2 and NCK interacting kinase [Source:NCBI gene;Acc:100233204]
SLC26A4	ENSSSCG00000028969	solute carrier family 26 member 4 [Source:NCBI gene;Acc:100622822]
	ENSSSCG00000029257	acrosin inhibitor [Source:NCBI gene;Acc:396905]
KCNE3	ENSSSCG00000029323	potassium voltage-gated channel subfamily E regulatory subunit 3 [Source:NCBI gene;Acc:397168]
	ENSSSCG00000029403	chromosome 6 C16orf74 homolog [Source:NCBI gene;Acc:100513354]
AVIL	ENSSSCG00000029571	advillin [Source:NCBI gene;Acc:100624986]
RPS9	ENSSSCG00000029785	ribosomal protein S9 [Source:NCBI gene;Acc:100622613]
RHOBTB3	ENSSSCG00000029805	Rho related BTB domain containing 3 [Source:NCBI gene;Acc:100523594]
GINM1	ENSSSCG00000030067	glycoprotein integral membrane 1 [Source:NCBI gene;Acc:102157824]
ANAPC7	ENSSSCG00000030222	anaphase promoting complex subunit 7 [Source:NCBI gene;Acc:100155743]
	ENSSSCG00000030300	metallothionein-2A [Source:NCBI gene;Acc:396827]
DDX58	ENSSSCG00000030408	DExD/H-box helicase 58 [Source:NCBI gene;Acc:396723]
SELENOI	ENSSSCG00000030643	selenoprotein I [Source:NCBI gene;Acc:100512162]
PDIK1L	ENSSSCG00000030660	PDLIM1 interacting kinase 1 like [Source:NCBI gene;Acc:100624130]
ZNF692	ENSSSCG00000030672	zinc finger protein 692 [Source:NCBI gene;Acc:100525277]
CAPN7	ENSSSCG00000030697	calpain 7 [Source:NCBI gene;Acc:100037936]
LENG8	ENSSSCG00000030857	leukocyte receptor cluster member 8 [Source:NCBI gene;Acc:106504183]
S100A1	ENSSSCG00000031053	S100 calcium binding protein A1 [Source:NCBI gene;Acc:106504218]
CBR1	ENSSSCG00000031111	carbonyl reductase 1 [Source:NCBI gene;Acc:397143]
TMEM123	ENSSSCG00000031170	transmembrane protein 123 [Source:NCBI gene;Acc:100622759]
DDA1	ENSSSCG00000031251	DET1 and DDB1 associated 1 [Source:NCBI gene;Acc:100626587]
CMKLR1	ENSSSCG00000031346	chemerin chemokine-like receptor 1 [Source:NCBI gene;Acc:780421]
	ENSSSCG00000031349	zinc finger protein 580 [Source:NCBI gene;Acc:100627967]
KBTBD6	ENSSSCG00000031378	kelch repeat and BTB domain-containing protein 6 [Source:NCBI gene;Acc:100154105]
	ENSSSCG00000031398	PI-PLC X domain-containing protein 1-like [Source:NCBI gene;Acc:110257938]
YAP1	ENSSSCG00000031429	Yes1 associated transcriptional regulator [Source:NCBI gene;Acc:100622418]
CLP1	ENSSSCG00000031442	cleavage factor polyribonucleotide kinase subunit 1 [Source:NCBI gene;Acc:100520541]
ZKSCAN1	ENSSSCG00000031461	zinc finger with KRAB and SCAN domains 1 [Source:NCBI gene;Acc:102162731]
PRRX1	ENSSSCG00000031503	paired related homeobox 1 [Source:NCBI gene;Acc:100738910]
NUDT3	ENSSSCG00000031593	nudix hydrolase 3 [Source:NCBI gene;Acc:100737442]
CDADC1	ENSSSCG00000031598	cytidine and dCMP deaminase domain containing 1 [Source:NCBI gene;Acc:100620546]
CADM1	ENSSSCG00000031831	cell adhesion molecule 1 [Source:NCBI gene;Acc:106504882]
	ENSSSCG00000031912
SLC39A10	ENSSSCG00000031954	solute carrier family 39 member 10 [Source:NCBI gene;Acc:110257100]
RASSF5	ENSSSCG00000031970	Ras association domain family member 5 [Source:NCBI gene;Acc:100521638]
	ENSSSCG00000032110	general transcription factor IIIC subunit 5 [Source:NCBI gene;Acc:102157976]
DUT	ENSSSCG00000032141	deoxyuridine triphosphatase [Source:NCBI gene;Acc:100621123]
ATP5MD	ENSSSCG00000032165	ATP synthase membrane subunit DAPIT [Source:NCBI gene;Acc:100520866]
CCDC117	ENSSSCG00000032261	coiled-coil domain containing 117 [Source:NCBI gene;Acc:110256859]
PLAUR	ENSSSCG00000032434	plasminogen activator, urokinase receptor [Source:NCBI gene;Acc:100521017]
TIMM21	ENSSSCG00000032494	translocase of inner mitochondrial membrane 21 [Source:NCBI gene;Acc:100622200]
RBL2	ENSSSCG00000032648	RB transcriptional corepressor like 2 [Source:NCBI gene;Acc:100627715]
TCEA3	ENSSSCG00000032674	transcription elongation factor A3 [Source:NCBI gene;Acc:100624383]
ZBTB43	ENSSSCG00000032752	zinc finger and BTB domain containing 43 [Source:NCBI gene;Acc:100627923]
	ENSSSCG00000032843	aryl-hydrocarbon receptor repressor [Source:NCBI gene;Acc:100624847]
GCNT2	ENSSSCG00000033009	N-acetyllactosaminide beta-1,6-N-acetylglucosaminyl-transferase [Source:NCBI gene;Acc:100152566]
RGS6	ENSSSCG00000033093	regulator of G protein signaling 6 [Source:NCBI gene;Acc:100620491]
IFNAR1	ENSSSCG00000033115	interferon alpha and beta receptor subunit 1 [Source:NCBI gene;Acc:396658]
RPS15	ENSSSCG00000033169	ribosomal protein S15 [Source:NCBI gene;Acc:397607]
DLX6	ENSSSCG00000033314	distal-less homeobox 6 [Source:NCBI gene;Acc:110255474]
	ENSSSCG00000033388
	ENSSSCG00000033500	small nuclear ribonucleoprotein D2 polypeptide [Source:NCBI gene;Acc:100626720]
SBSN	ENSSSCG00000033702	suprabasin [Source:NCBI gene;Acc:106510510]
ATG12	ENSSSCG00000033912	autophagy related 12 [Source:NCBI gene;Acc:100462745]
SERHL2	ENSSSCG00000034350	serine hydrolase like 2 [Source:NCBI gene;Acc:106508710]
MRPL58	ENSSSCG00000034406	mitochondrial ribosomal protein L58 [Source:NCBI gene;Acc:100512432]
CREBL2	ENSSSCG00000034418	cAMP responsive element binding protein like 2 [Source:NCBI gene;Acc:102159830]
	ENSSSCG00000034709	eukaryotic translation initiation factor 5 [Source:NCBI gene;Acc:110255321]
	ENSSSCG00000034739
HPRT1	ENSSSCG00000034896	hypoxanthine phosphoribosyltransferase 1 [Source:NCBI gene;Acc:397351]
SH3BGRL3	ENSSSCG00000034937	SH3 domain binding glutamate rich protein like 3 [Source:NCBI gene;Acc:100621842]
	ENSSSCG00000035037	salt inducible kinase 1 [Source:NCBI gene;Acc:100621265]
TRIM38	ENSSSCG00000035153	tripartite motif containing 38 [Source:NCBI gene;Acc:100154512]
	ENSSSCG00000035189	transmembrane protein 37 [Source:NCBI gene;Acc:100522166]
BCL2L1	ENSSSCG00000035357	BCL2 like 1 [Source:NCBI gene;Acc:397536]
XXYLT1	ENSSSCG00000035414	xyloside xylosyltransferase 1 [Source:NCBI gene;Acc:110256394]
KITLG	ENSSSCG00000035495	KIT ligand [Source:NCBI gene;Acc:397509]
MCM6	ENSSSCG00000035564	minichromosome maintenance complex component 6 [Source:NCBI gene;Acc:110257107]
	ENSSSCG00000035893	collectrin, amino acid transport regulator [Source:NCBI gene;Acc:102167302]
DSEL	ENSSSCG00000035941	dermatan sulfate epimerase like [Source:NCBI gene;Acc:110261618]
XG	ENSSSCG00000036036	Xg glycoprotein (Xg blood group) [Source:HGNC Symbol;Acc:HGNC:12806]
RRM2B	ENSSSCG00000036139	ribonucleotide reductase regulatory TP53 inducible subunit M2B [Source:NCBI gene;Acc:100157205]
PDSS2	ENSSSCG00000036168	decaprenyl diphosphate synthase subunit 2 [Source:NCBI gene;Acc:100312977]
ELOVL6	ENSSSCG00000036236	ELOVL fatty acid elongase 6 [Source:NCBI gene;Acc:100312970]
FAM126B	ENSSSCG00000036339	family with sequence similarity 126 member B [Source:HGNC Symbol;Acc:HGNC:28593]
LURAP1L	ENSSSCG00000036360	leucine rich adaptor protein 1 like [Source:NCBI gene;Acc:102165373]
	ENSSSCG00000036499	LIM domain only 3 [Source:NCBI gene;Acc:100127154]
DPYSL3	ENSSSCG00000036549	dihydropyrimidinase like 3 [Source:NCBI gene;Acc:100525453]
	ENSSSCG00000036603	CLN3 lysosomal/endosomal transmembrane protein, battenin [Source:NCBI gene;Acc:100127354]
	ENSSSCG00000036618	Fc fragment of IgG receptor IIIa [Source:NCBI gene;Acc:397684]
C6orf132	ENSSSCG00000036801	chromosome 7 C6orf132 homolog [Source:NCBI gene;Acc:102167684]
	ENSSSCG00000036820	ras-related protein Rap-2a pseudogene [Source:NCBI gene;Acc:110258338]
STK40	ENSSSCG00000036832	serine/threonine kinase 40 [Source:NCBI gene;Acc:100625215]
SESN3	ENSSSCG00000037015	sestrin 3 [Source:NCBI gene;Acc:100526065]
PLVAP	ENSSSCG00000037025	plasmalemma vesicle associated protein [Source:NCBI gene;Acc:110259322]
	ENSSSCG00000037142	cysteine-rich protein 1 [Source:NCBI gene;Acc:110258364]
CDKN1B	ENSSSCG00000037144	cyclin dependent kinase inhibitor 1B [Source:NCBI gene;Acc:397584]
ZNF248	ENSSSCG00000037204	zinc finger protein 248 [Source:NCBI gene;Acc:100155460]
TIMM17A	ENSSSCG00000037431	translocase of inner mitochondrial membrane 17A [Source:NCBI gene;Acc:110255663]
FKBP14	ENSSSCG00000037575	FKBP prolyl isomerase 14 [Source:NCBI gene;Acc:100514551]
F2RL2	ENSSSCG00000037582	coagulation factor II thrombin receptor like 2 [Source:NCBI gene;Acc:100519355]
AMMECR1	ENSSSCG00000037591	AMMECR nuclear protein 1 [Source:NCBI gene;Acc:100520351]
GGH	ENSSSCG00000037637	gamma-glutamyl hydrolase [Source:NCBI gene;Acc:100154232]
DNAJA4	ENSSSCG00000037646	DnaJ heat shock protein family (Hsp40) member A4 [Source:NCBI gene;Acc:397613]
TSFM	ENSSSCG00000037767	Ts translation elongation factor, mitochondrial [Source:NCBI gene;Acc:100622167]
CYTH4	ENSSSCG00000000130	cytohesin 4 [Source:NCBI gene;Acc:100240722]
DNAJC22	ENSSSCG00000000198	DnaJ heat shock protein family (Hsp40) member C22 [Source:NCBI gene;Acc:100623474]
KCNC2	ENSSSCG00000000516	potassium voltage-gated channel subfamily C member 2 [Source:NCBI gene;Acc:100153996]
BBS10	ENSSSCG00000000523	Bardet-Biedl syndrome 10 [Source:NCBI gene;Acc:100737698]
	ENSSSCG00000000563	lymphoid restricted membrane protein [Source:NCBI gene;Acc:100626686]
IAPP	ENSSSCG00000000582	islet amyloid polypeptide [Source:NCBI gene;Acc:100520838]
CD69	ENSSSCG00000000653	CD69 molecule [Source:NCBI gene;Acc:397165]
AKAP3	ENSSSCG00000000720	A-kinase anchoring protein 3 [Source:NCBI gene;Acc:100337663]
FOXM1	ENSSSCG00000000739	forkhead box M1 [Source:NCBI gene;Acc:100511565]
CNTN1	ENSSSCG00000000789	contactin 1 [Source:NCBI gene;Acc:100521555]
AMDHD1	ENSSSCG00000000893	amidohydrolase domain containing 1 [Source:NCBI gene;Acc:100151804]
C12orf50	ENSSSCG00000000924	chromosome 5 C12orf50 homolog [Source:NCBI gene;Acc:100524088]
STMND1	ENSSSCG00000001067	stathmin domain containing 1 [Source:NCBI gene;Acc:100524942]
ZNRD1	ENSSSCG00000001245	zinc ribbon domain containing 1 [Source:NCBI gene;Acc:100152094]
COL21A1	ENSSSCG00000001500	collagen type XXI alpha 1 chain [Source:NCBI gene;Acc:100523618]
LRFN2	ENSSSCG00000001597	leucine rich repeat and fibronectin type III domain containing 2 [Source:NCBI gene;Acc:100153249]
CHRNA5	ENSSSCG00000001751	cholinergic receptor nicotinic alpha 5 subunit [Source:NCBI gene;Acc:100156023]
BNC1	ENSSSCG00000001798	basonuclin 1 [Source:NCBI gene;Acc:100156444]
ACAN	ENSSSCG00000001832	aggrecan [Source:NCBI gene;Acc:397255]
INSYN1	ENSSSCG00000001916	inhibitory synaptic factor 1 [Source:NCBI gene;Acc:100156505]
NPAS3	ENSSSCG00000001964	neuronal PAS domain protein 3 [Source:NCBI gene;Acc:100621114]
AP4S1	ENSSSCG00000001972	adaptor related protein complex 4 subunit sigma 1 [Source:NCBI gene;Acc:100154615]
CIDEB	ENSSSCG00000001989	cell death inducing DFFA like effector b [Source:NCBI gene;Acc:100127160]
RPGRIP1	ENSSSCG00000002129	RPGR interacting protein 1 [Source:NCBI gene;Acc:100155563]
KLHL33	ENSSSCG00000002140	kelch like family member 33 [Source:NCBI gene;Acc:100154698]
PPP1R36	ENSSSCG00000002275	protein phosphatase 1 regulatory subunit 36 [Source:NCBI gene;Acc:100157071]
SLC8A3	ENSSSCG00000002315	solute carrier family 8 member A3 [Source:NCBI gene;Acc:100152101]
FAM161B	ENSSSCG00000002353	FAM161 centrosomal protein B [Source:NCBI gene;Acc:100512240]
ZC2HC1C	ENSSSCG00000002380	zinc finger C2HC-type containing 1C [Source:NCBI gene;Acc:100153971]
BDKRB1	ENSSSCG00000002501	bradykinin receptor B1 [Source:NCBI gene;Acc:100127469]
RTL1	ENSSSCG00000002573	retrotransposon Gag like 1 [Source:NCBI gene;Acc:100187562]
ZNF423	ENSSSCG00000002838	zinc finger protein 423 [Source:NCBI gene;Acc:100520077]
	ENSSSCG00000002857	tudor domain containing 12 [Source:NCBI gene;Acc:102162257]
ETV2	ENSSSCG00000002906	ETS variant transcription factor 2 [Source:HGNC Symbol;Acc:HGNC:3491]
LRFN3	ENSSSCG00000002927	leucine rich repeat and fibronectin type III domain containing 3 [Source:NCBI gene;Acc:100738610]
MAP4K1	ENSSSCG00000002962	mitogen-activated protein kinase kinase kinase kinase 1 [Source:NCBI gene;Acc:100516374]
TTC9B	ENSSSCG00000002991	tetratricopeptide repeat protein 9B [Source:NCBI gene;Acc:100522141]
ZNF404	ENSSSCG00000003071	zinc finger protein 404 [Source:NCBI gene;Acc:100737509]
ZSWIM9	ENSSSCG00000003129	zinc finger SWIM-type containing 9 [Source:NCBI gene;Acc:102165016]
MYBPC2	ENSSSCG00000003218	myosin binding protein C2 [Source:NCBI gene;Acc:100511817]
EPHB2	ENSSSCG00000003527	EPH receptor B2 [Source:NCBI gene;Acc:100519549]
CABYR	ENSSSCG00000003711	calcium binding tyrosine phosphorylation regulated [Source:NCBI gene;Acc:100511266]
CDH2	ENSSSCG00000003722	cadherin 2 [Source:NCBI gene;Acc:100515322]
ASXL3	ENSSSCG00000003736	ASXL transcriptional regulator 3 [Source:NCBI gene;Acc:100518495]
LRRIQ3	ENSSSCG00000003784	leucine rich repeats and IQ motif containing 3 [Source:NCBI gene;Acc:733655]
	ENSSSCG00000003803	chromosome 6 C1orf141 homolog [Source:NCBI gene;Acc:100519721]
DAB1	ENSSSCG00000003833	DAB adaptor protein 1 [Source:NCBI gene;Acc:100037307]
SLFNL1	ENSSSCG00000003972	schlafen like 1 [Source:NCBI gene;Acc:100526058]
PDE10A	ENSSSCG00000004027	phosphodiesterase 10A [Source:NCBI gene;Acc:100154378]
ECT2L	ENSSSCG00000004147	epithelial cell transforming 2 like [Source:NCBI gene;Acc:100153588]
SLC35D3	ENSSSCG00000004159	solute carrier family 35 member D3 [Source:NCBI gene;Acc:100737566]
SAMD3	ENSSSCG00000004202	sterile alpha motif domain containing 3 [Source:NCBI gene;Acc:100524004]
BACH2	ENSSSCG00000004332	BTB domain and CNC homolog 2 [Source:NCBI gene;Acc:100620522]
CA12	ENSSSCG00000004565	carbonic anhydrase 12 [Source:NCBI gene;Acc:100152749]
TTBK2	ENSSSCG00000004718	tau tubulin kinase 2 [Source:NCBI gene;Acc:100511488]
EXD1	ENSSSCG00000004752	exonuclease 3'-5' domain containing 1 [Source:NCBI gene;Acc:100516945]
TTC23	ENSSSCG00000004813	tetratricopeptide repeat domain 23 [Source:NCBI gene;Acc:100518888]
CDH20	ENSSSCG00000004903	cadherin 20 [Source:NCBI gene;Acc:100522414]
LRRC49	ENSSSCG00000004976	leucine rich repeat containing 49 [Source:NCBI gene;Acc:100154470]
MDGA2	ENSSSCG00000005002	MAM domain containing glycosylphosphatidylinositol anchor 2 [Source:NCBI gene;Acc:100621082]
L2HGDH	ENSSSCG00000005016	L-2-hydroxyglutarate dehydrogenase [Source:NCBI gene;Acc:100152180]
KIAA0586	ENSSSCG00000005076	KIAA0586 ortholog [Source:NCBI gene;Acc:100516532]
LRRC9	ENSSSCG00000005081	leucine-rich repeat-containing protein 9 [Source:NCBI gene;Acc:100622535]
P14ARF	ENSSSCG00000005134	p14ARF protein [Source:NCBI gene;Acc:396553]
PTPRD	ENSSSCG00000005194	protein tyrosine phosphatase receptor type D [Source:NCBI gene;Acc:100627072]
TRPM3	ENSSSCG00000005257	transient receptor potential cation channel subfamily M member 3 [Source:NCBI gene;Acc:100157158]
CEP78	ENSSSCG00000005286	centrosomal protein 78 [Source:NCBI gene;Acc:100154982]
AMBP	ENSSSCG00000005485	alpha-1-microglobulin/bikunin precursor [Source:NCBI gene;Acc:397593]
SCAI	ENSSSCG00000005598	suppressor of cancer cell invasion [Source:NCBI gene;Acc:100515704]
TTC16	ENSSSCG00000005616	tetratricopeptide repeat domain 16 [Source:NCBI gene;Acc:100624051]
KHDRBS3	ENSSSCG00000005941	KH RNA binding domain containing, signal transduction associated 3 [Source:NCBI gene;Acc:100155706]
	ENSSSCG00000005949	Src like adaptor [Source:NCBI gene;Acc:100156099]
ANXA13	ENSSSCG00000005979	annexin A13 [Source:NCBI gene;Acc:100155380]
SLC30A8	ENSSSCG00000006011	solute carrier family 30 member 8 [Source:NCBI gene;Acc:100155672]
TMEM74	ENSSSCG00000006031	transmembrane protein 74 [Source:NCBI gene;Acc:100525987]
RALYL	ENSSSCG00000006149	RALY RNA binding protein-like [Source:NCBI gene;Acc:100739123]
PI15	ENSSSCG00000006172	peptidase inhibitor 15 [Source:NCBI gene;Acc:100158209]
MSC	ENSSSCG00000006187	musculin [Source:NCBI gene;Acc:100155518]
METTL18	ENSSSCG00000006285	methyltransferase like 18 [Source:NCBI gene;Acc:100153964]
GPR161	ENSSSCG00000006302	G protein-coupled receptor 161 [Source:NCBI gene;Acc:100155594]
LY9	ENSSSCG00000006375	lymphocyte antigen 9 [Source:NCBI gene;Acc:100155269]
	ENSSSCG00000006380	signaling lymphocytic activation molecule family member 1 [Source:NCBI gene;Acc:100511325]
VANGL2	ENSSSCG00000006383	VANGL planar cell polarity protein 2 [Source:NCBI gene;Acc:100158100]
OR6K6	ENSSSCG00000006425	olfactory receptor 6K6 [Source:NCBI gene;Acc:100155266]
NTRK1	ENSSSCG00000006464	neurotrophic receptor tyrosine kinase 1 [Source:NCBI gene;Acc:100154471]
RXFP4	ENSSSCG00000006503	relaxin family peptide/INSL5 receptor 4 [Source:NCBI gene;Acc:450213]
SV2A	ENSSSCG00000006666	synaptic vesicle glycoprotein 2A [Source:NCBI gene;Acc:100156610]
SLC6A17	ENSSSCG00000006811	solute carrier family 6 member 17 [Source:NCBI gene;Acc:100156430]
	ENSSSCG00000006958	DNA topoisomerase I mitochondrial [Source:NCBI gene;Acc:100628093]
ZDHHC2	ENSSSCG00000006982	zinc finger DHHC-type palmitoyltransferase 2 [Source:NCBI gene;Acc:100516118]
	ENSSSCG00000007005	chondroitin sulfate N-acetylgalactosaminyltransferase 1 [Source:NCBI gene;Acc:100517735]
DKK4	ENSSSCG00000007029	dickkopf WNT signaling pathway inhibitor 4 [Source:NCBI gene;Acc:106508176]
AP3M2	ENSSSCG00000007033	adaptor related protein complex 3 subunit mu 2 [Source:NCBI gene;Acc:100525135]
FAM83D	ENSSSCG00000007351	family with sequence similarity 83 member D [Source:NCBI gene;Acc:102164658]
TFR2	ENSSSCG00000007671	actin like 6B [Source:NCBI gene;Acc:100516853]
ZAN	ENSSSCG00000007674	zonadhesin [Source:NCBI gene;Acc:397676]
NLRC3	ENSSSCG00000007956	NLR family CARD domain containing 3 [Source:NCBI gene;Acc:100135669]
SLC5A7	ENSSSCG00000008140	solute carrier family 5 member 7 [Source:NCBI gene;Acc:100512044]
LRRTM4	ENSSSCG00000008259	leucine rich repeat transmembrane neuronal 4 [Source:NCBI gene;Acc:100525866]
WDR54	ENSSSCG00000008282	WD repeat domain 54 [Source:NCBI gene;Acc:100513590]
CNRIP1	ENSSSCG00000008349	cannabinoid receptor interacting protein 1 [Source:NCBI gene;Acc:100737807]
DRC1	ENSSSCG00000008568	dynein regulatory complex subunit 1 [Source:NCBI gene;Acc:102159735]
ADGRF3	ENSSSCG00000008570	adhesion G protein-coupled receptor F3 [Source:NCBI gene;Acc:100512530]
MFSD2B	ENSSSCG00000008590	major facilitator superfamily domain containing 2B [Source:NCBI gene;Acc:100522434]
MATN3	ENSSSCG00000008603	matrilin 3 [Source:NCBI gene;Acc:100516005]
CYRIA	ENSSSCG00000008617	CYFIP related Rac1 interactor A [Source:NCBI gene;Acc:100518011]
ZFYVE28	ENSSSCG00000008689	zinc finger FYVE-type containing 28 [Source:NCBI gene;Acc:100516091]
	ENSSSCG00000008709	chromosome 8 C4orf50 homolog [Source:NCBI gene;Acc:102165264]
PROM1	ENSSSCG00000008745	prominin 1 [Source:NCBI gene;Acc:100511336]
TLL1	ENSSSCG00000008853	tolloid like 1 [Source:NCBI gene;Acc:100512480]
	ENSSSCG00000008892	zinc finger protein 11-like [Source:NCBI gene;Acc:100620089]
AMCF-II	ENSSSCG00000008957	alveolar macrophage-derived chemotactic factor-II [Source:NCBI gene;Acc:396900]
PABPC4L	ENSSSCG00000009067	poly(A) binding protein cytoplasmic 4 like [Source:NCBI gene;Acc:100627820]
C4orf33	ENSSSCG00000009069	chromosome 8 C4orf33 homolog [Source:NCBI gene;Acc:100515496]
ADH4	ENSSSCG00000009184	alcohol dehydrogenase 4 (class II), pi polypeptide [Source:NCBI gene;Acc:100513366]
RFC3	ENSSSCG00000009349	replication factor C subunit 3 [Source:NCBI gene;Acc:100156440]
CNMD	ENSSSCG00000009442	chondromodulin [Source:NCBI gene;Acc:100737209]
DCT	ENSSSCG00000009490	dopachrome tautomerase [Source:NCBI gene;Acc:574066]
	ENSSSCG00000009543	myosin XVI [Source:NCBI gene;Acc:102161679]
ATP4B	ENSSSCG00000009561	ATPase H+/K+ transporting subunit beta [Source:NCBI gene;Acc:397131]
GFRA2	ENSSSCG00000009605	GDNF family receptor alpha 2 [Source:NCBI gene;Acc:102166950]
PEBP4	ENSSSCG00000009631	phosphatidylethanolamine binding protein 4 [Source:NCBI gene;Acc:100302365]
RASAL1	ENSSSCG00000009874	RAS protein activator like 1 [Source:NCBI gene;Acc:100525129]
SEZ6L	ENSSSCG00000009958	seizure related 6 homolog like [Source:NCBI gene;Acc:100154854]
SLC2A11	ENSSSCG00000010068	solute carrier family 2 member 11 [Source:NCBI gene;Acc:100125552]
SERPIND1	ENSSSCG00000010093	serpin family D member 1 [Source:NCBI gene;Acc:100155945]
	ENSSSCG00000010165
	ENSSSCG00000010190	actin alpha 1, skeletal muscle [Source:NCBI gene;Acc:100154254]
PLA2G12B	ENSSSCG00000010291	phospholipase A2 group XIIB [Source:NCBI gene;Acc:100152597]
KCNMA1	ENSSSCG00000010325	potassium calcium-activated channel subfamily M alpha 1 [Source:NCBI gene;Acc:397434]
NRG3	ENSSSCG00000010344	neuregulin 3 [Source:NCBI gene;Acc:100158106]
IFIT2	ENSSSCG00000010451	interferon induced protein with tetratricopeptide repeats 2 [Source:NCBI gene;Acc:100155467]
	ENSSSCG00000010489	ATM interactor [Source:NCBI gene;Acc:102166602]
CFAP43	ENSSSCG00000010609	cilia and flagella associated protein 43 [Source:NCBI gene;Acc:100154215]
GPAM	ENSSSCG00000010631	glycerol-3-phosphate acyltransferase, mitochondrial [Source:NCBI gene;Acc:397629]
HABP2	ENSSSCG00000010639	hyaluronan binding protein 2 [Source:NCBI gene;Acc:100157966]
PNLIP	ENSSSCG00000010658	pancreatic lipase [Source:NCBI gene;Acc:100157809]
	ENSSSCG00000010745	fibronectin type III and ankyrin repeat domains 1 [Source:NCBI gene;Acc:100153851]
RGS7	ENSSSCG00000010840	regulator of G protein signaling 7 [Source:NCBI gene;Acc:100521858]
NTRK2	ENSSSCG00000010959	neurotrophic receptor tyrosine kinase 2 [Source:NCBI gene;Acc:100519209]
ARID3C	ENSSSCG00000010971	AT-rich interaction domain 3C [Source:NCBI gene;Acc:100524334]
ARMC3	ENSSSCG00000011078	armadillo repeat containing 3 [Source:NCBI gene;Acc:100519618]
ZNF782	ENSSSCG00000011167	zinc finger protein 782 [Source:NCBI gene;Acc:102164376]
COL6A5	ENSSSCG00000011186	collagen type VI alpha 5 chain [Source:NCBI gene;Acc:100515967]
SATB1	ENSSSCG00000011201	SATB homeobox 1 [Source:NCBI gene;Acc:100155111]
KCNH8	ENSSSCG00000011204	potassium voltage-gated channel subfamily H member 8 [Source:NCBI gene;Acc:100626552]
ZNF385D	ENSSSCG00000011208	zinc finger protein 385D [Source:NCBI gene;Acc:100520455]
	ENSSSCG00000011307	zinc finger protein 501 [Source:NCBI gene;Acc:100738134]
MYL3	ENSSSCG00000011325	myosin light chain 3 [Source:NCBI gene;Acc:100515755]
ATRIP	ENSSSCG00000011359	ATR interacting protein [Source:NCBI gene;Acc:100523399]
CELSR3	ENSSSCG00000011360	cadherin EGF LAG seven-pass G-type receptor 3 [Source:NCBI gene;Acc:100622195]
TM4SF4	ENSSSCG00000011703	transmembrane 4 L six family member 4 [Source:NCBI gene;Acc:100522400]
AHSG	ENSSSCG00000011799	alpha 2-HS glycoprotein [Source:NCBI gene;Acc:397585]
KNG1	ENSSSCG00000011802	kininogen 1 [Source:NCBI gene;Acc:396568]
SLC51A	ENSSSCG00000011846	solute carrier family 51 subunit alpha [Source:NCBI gene;Acc:100512372]
CEP97	ENSSSCG00000011949	centrosomal protein 97 [Source:NCBI gene;Acc:100521822]
TLR8	ENSSSCG00000012118	toll like receptor 8 [Source:NCBI gene;Acc:397384]
BMX	ENSSSCG00000012137	BMX non-receptor tyrosine kinase [Source:NCBI gene;Acc:100516528]
ACE2	ENSSSCG00000012138	angiotensin I converting enzyme 2 [Source:NCBI gene;Acc:100144303]
GRPR	ENSSSCG00000012144	gastrin releasing peptide receptor [Source:NCBI gene;Acc:100517439]
RAI2	ENSSSCG00000012153	retinoic acid induced 2 [Source:NCBI gene;Acc:100154649]
CXorf21	ENSSSCG00000012201	chromosome X CXorf21 homolog [Source:NCBI gene;Acc:100156110]
P2RY10	ENSSSCG00000012446	P2Y receptor family member 10 [Source:NCBI gene;Acc:100157702]
RPS6KA6	ENSSSCG00000012456	ribosomal protein S6 kinase A6 [Source:NCBI gene;Acc:100522294]
	ENSSSCG00000012504	nucleosome assembly protein 1 like 3 [Source:NCBI gene;Acc:100519582]
GPRASP2	ENSSSCG00000012521	G protein-coupled receptor associated sorting protein 2 [Source:NCBI gene;Acc:100523415]
SLC25A53	ENSSSCG00000012540	solute carrier family 25 member 53 [Source:NCBI gene;Acc:100514813]
	ENSSSCG00000012544	testis expressed 13A [Source:NCBI gene;Acc:100739129]
NUP62CL	ENSSSCG00000012557	nucleoporin 62 C-terminal like [Source:NCBI gene;Acc:100517135]
ATP1B4	ENSSSCG00000012606	ATPase Na+/K+ transporting family member beta 4 [Source:NCBI gene;Acc:397245]
TENM1	ENSSSCG00000012644	teneurin transmembrane protein 1 [Source:NCBI gene;Acc:100520416]
F9	ENSSSCG00000012711	coagulation factor IX [Source:NCBI gene;Acc:397518]
L1CAM	ENSSSCG00000012787	L1 cell adhesion molecule [Source:NCBI gene;Acc:100525324]
TIGD3	ENSSSCG00000012994	tigger transposable element derived 3 [Source:NCBI gene;Acc:100737751]
PRR5L	ENSSSCG00000013292	proline rich 5 like [Source:NCBI gene;Acc:100523837]
SLC1A2	ENSSSCG00000013296	solute carrier family 1 member 2 [Source:NCBI gene;Acc:100627068]
WT1	ENSSSCG00000013316	WT1 transcription factor [Source:NCBI gene;Acc:397338]
METTL15	ENSSSCG00000013331	methyltransferase like 15 [Source:NCBI gene;Acc:100517930]
IZUMO4	ENSSSCG00000013455	IZUMO family member 4 [Source:NCBI gene;Acc:100514821]
QTRT1	ENSSSCG00000013637	queuine tRNA-ribosyltransferase catalytic subunit 1 [Source:NCBI gene;Acc:100524546]
	ENSSSCG00000013717	zinc finger protein 709 [Source:NCBI gene;Acc:100624806]
NANOS3	ENSSSCG00000013759	nanos C2HC-type zinc finger 3 [Source:HGNC Symbol;Acc:HGNC:22048]
	ENSSSCG00000013785	adhesion G protein-coupled receptor E2-like [Source:NCBI gene;Acc:110259331]
TMEM38A	ENSSSCG00000013864	transmembrane protein 38A [Source:NCBI gene;Acc:100514568]
CRHBP	ENSSSCG00000014093	corticotropin releasing hormone binding protein [Source:NCBI gene;Acc:100337682]
RASGRF2	ENSSSCG00000014127	Ras protein specific guanine nucleotide releasing factor 2 [Source:NCBI gene;Acc:100515363]
	ENSSSCG00000014314	F-box and leucine rich repeat protein 21, pseudogene [Source:NCBI gene;Acc:100517085]
CDC25C	ENSSSCG00000014329	cell division cycle 25C [Source:NCBI gene;Acc:100144474]
HPX	ENSSSCG00000014626	hemopexin [Source:NCBI gene;Acc:396998]
OR51E1	ENSSSCG00000014766	olfactory receptor 51E1 [Source:NCBI gene;Acc:100737531]
DDIAS	ENSSSCG00000014898	DNA damage induced apoptosis suppressor [Source:NCBI gene;Acc:100517842]
DLG2	ENSSSCG00000014904	discs large MAGUK scaffold protein 2 [Source:NCBI gene;Acc:100516384]
ARHGAP20	ENSSSCG00000015015	Rho GTPase activating protein 20 [Source:NCBI gene;Acc:102168176]
C11orf88	ENSSSCG00000015021	chromosome 9 C11orf88 homolog [Source:NCBI gene;Acc:100513750]
DSCAML1	ENSSSCG00000015082	DS cell adhesion molecule like 1 [Source:NCBI gene;Acc:100511146]
CD3D	ENSSSCG00000015093	CD3d molecule [Source:NCBI gene;Acc:396661]
GRIK4	ENSSSCG00000015131	glutamate ionotropic receptor kainate type subunit 4 [Source:NCBI gene;Acc:100523504]
CRTAM	ENSSSCG00000015137	cytotoxic and regulatory T cell molecule [Source:NCBI gene;Acc:100521388]
GLB1L2	ENSSSCG00000015258	galactosidase beta 1 like 3 [Source:NCBI gene;Acc:100303609]
CACNA2D1	ENSSSCG00000015402	calcium voltage-gated channel auxiliary subunit alpha2delta 1 [Source:NCBI gene;Acc:397377]
TNR	ENSSSCG00000015508	tenascin R [Source:NCBI gene;Acc:100520686]
CACNA1E	ENSSSCG00000015543	calcium voltage-gated channel subunit alpha1 E [Source:NCBI gene;Acc:100511769]
PACC1	ENSSSCG00000015598	proton activated chloride channel 1 [Source:NCBI gene;Acc:100524887]
CFAP221	ENSSSCG00000015741	cilia and flagella associated protein 221 [Source:NCBI gene;Acc:100521408]
STOX2	ENSSSCG00000015780	storkhead box 2 [Source:NCBI gene;Acc:100156897]
DUSP26	ENSSSCG00000015835	dual specificity phosphatase 26 [Source:NCBI gene;Acc:100525894]
PTPRN	ENSSSCG00000016218	protein tyrosine phosphatase receptor type N [Source:NCBI gene;Acc:100155609]
DOCK10	ENSSSCG00000016237	dedicator of cytokinesis 10 [Source:NCBI gene;Acc:100512141]
TM4SF20	ENSSSCG00000016247	transmembrane 4 L six family member 20 [Source:NCBI gene;Acc:100513630]
	ENSSSCG00000016284	intestinal-type alkaline phosphatase-like [Source:NCBI gene;Acc:100522404]
SAG	ENSSSCG00000016301	S-antigen visual arrestin [Source:NCBI gene;Acc:397151]
RNF32	ENSSSCG00000016414	ring finger protein 32 [Source:NCBI gene;Acc:100511726]
AKR1D1	ENSSSCG00000016519	aldo-keto reductase family 1 member D1 [Source:NCBI gene;Acc:100520813]
DGKI	ENSSSCG00000016521	diacylglycerol kinase iota [Source:NCBI gene;Acc:100521167]
FAM71F2	ENSSSCG00000016583	family with sequence similarity 71 member F2 [Source:NCBI gene;Acc:100520159]
WNT16	ENSSSCG00000016617	Wnt family member 16 [Source:NCBI gene;Acc:100511484]
	ENSSSCG00000016655
CREB5	ENSSSCG00000016690	cAMP responsive element binding protein 5 [Source:NCBI gene;Acc:100515635]
HOXA2	ENSSSCG00000016706	homeobox A2 [Source:NCBI gene;Acc:100519993]
ADCY1	ENSSSCG00000016726	adenylate cyclase 1 [Source:NCBI gene;Acc:100624934]
	ENSSSCG00000016823	C1q and TNF related 3 [Source:NCBI gene;Acc:100270814]
AGXT2	ENSSSCG00000016829	alanine--glyoxylate aminotransferase 2 [Source:NCBI gene;Acc:100513890]
RANBP3L	ENSSSCG00000016838	RAN binding protein 3 like [Source:NCBI gene;Acc:100517433]
	ENSSSCG00000016868
CCL28	ENSSSCG00000016871	C-C motif chemokine ligand 28 [Source:NCBI gene;Acc:554303]
NIM1K	ENSSSCG00000016873	NIM1 serine/threonine protein kinase [Source:NCBI gene;Acc:100524404]
FGF10	ENSSSCG00000016878	fibroblast growth factor 10 [Source:NCBI gene;Acc:100525086]
FST	ENSSSCG00000016892	follistatin [Source:NCBI gene;Acc:445002]
GZMA	ENSSSCG00000016903	granzyme A (granzyme 1, cytotoxic T-lymphocyte-associated serine esterase 3) [Source:NCBI gene;Acc:100526762]
	ENSSSCG00000016969	small EDRK-rich factor 1 [Source:NCBI gene;Acc:100517502]
ADRA1B	ENSSSCG00000017041	adrenoceptor alpha 1B [Source:NCBI gene;Acc:100519931]
ADAMTS16	ENSSSCG00000017109	ADAM metallopeptidase with thrombospondin type 1 motif 16 [Source:NCBI gene;Acc:100519115]
CCDC40	ENSSSCG00000017158	coiled-coil domain containing 40 [Source:NCBI gene;Acc:100514181]
ETV4	ENSSSCG00000017379	ETS variant transcription factor 4 [Source:NCBI gene;Acc:100516755]
HAP1	ENSSSCG00000017427	huntingtin associated protein 1 [Source:NCBI gene;Acc:100736934]
CDC6	ENSSSCG00000017471	cell division cycle 6 [Source:NCBI gene;Acc:100522031]
CSF3	ENSSSCG00000017488	colony stimulating factor 3 [Source:NCBI gene;Acc:396839]
EME1	ENSSSCG00000017571	essential meiotic structure-specific endonuclease 1 [Source:NCBI gene;Acc:100516510]
HLF	ENSSSCG00000017604	HLF transcription factor, PAR bZIP family member [Source:NCBI gene;Acc:100736723]
TEX14	ENSSSCG00000017645	testis expressed 14, intercellular bridge forming factor [Source:NCBI gene;Acc:100737915]
INTS2	ENSSSCG00000017673	integrator complex subunit 2 [Source:NCBI gene;Acc:100525182]
	ENSSSCG00000017814	chromosome 12 C17orf97 homolog [Source:NCBI gene;Acc:100524395]
ENO3	ENSSSCG00000017904	enolase 3 [Source:NCBI gene;Acc:692156]
GPR179	ENSSSCG00000020884	G protein-coupled receptor 179 [Source:NCBI gene;Acc:100628121]
CAPN13	ENSSSCG00000020986	calpain 13 [Source:NCBI gene;Acc:100515606]
	ENSSSCG00000021414	protocadherin beta-17-like [Source:NCBI gene;Acc:100739498]
DFFB	ENSSSCG00000021436	DNA fragmentation factor subunit beta [Source:NCBI gene;Acc:100513357]
RIMS4	ENSSSCG00000021453	regulating synaptic membrane exocytosis 4 [Source:NCBI gene;Acc:100739310]
	ENSSSCG00000021656
ARHGEF38	ENSSSCG00000021764	Rho guanine nucleotide exchange factor 38 [Source:NCBI gene;Acc:100738766]
ENOX1	ENSSSCG00000021818	ecto-NOX disulfide-thiol exchanger 1 [Source:NCBI gene;Acc:100525605]
	ENSSSCG00000021941	zinc finger with KRAB and SCAN domains 1 [Source:NCBI gene;Acc:102162731]
	ENSSSCG00000021946	zinc finger protein 829 [Source:NCBI gene;Acc:100511329]
	ENSSSCG00000021998	solute carrier organic anion transporter family member 1B3 [Source:NCBI gene;Acc:100620829]
SPINK7	ENSSSCG00000022035	serine peptidase inhibitor Kazal type 7 [Source:NCBI gene;Acc:100622234]
MLNR	ENSSSCG00000022064	motilin receptor [Source:NCBI gene;Acc:100620836]
WDR78	ENSSSCG00000022305	WD repeat domain 78 [Source:NCBI gene;Acc:100620493]
TIRAP	ENSSSCG00000022413	TIR domain containing adaptor protein [Source:NCBI gene;Acc:100514174]
COCH	ENSSSCG00000022679	cochlin [Source:NCBI gene;Acc:100624179]
	ENSSSCG00000023041	poly(rC) binding protein 3 [Source:NCBI gene;Acc:100624867]
TROAP	ENSSSCG00000023176	trophinin associated protein [Source:NCBI gene;Acc:100511692]
ETV5	ENSSSCG00000023229	ETS variant transcription factor 5 [Source:NCBI gene;Acc:100623208]
	ENSSSCG00000023546	uncharacterized LOC100157285 [Source:NCBI gene;Acc:100157285]
NR2C2AP	ENSSSCG00000023658	nuclear receptor 2C2 associated protein [Source:NCBI gene;Acc:100620309]
MCOLN3	ENSSSCG00000023745	mucolipin 3 [Source:NCBI gene;Acc:100625693]
LRP1B	ENSSSCG00000023746	LDL receptor related protein 1B [Source:NCBI gene;Acc:100624047]
THPO	ENSSSCG00000023909	thrombopoietin [Source:NCBI gene;Acc:100620258]
NAGS	ENSSSCG00000024179	N-acetylglutamate synthase [Source:NCBI gene;Acc:100048960]
NKIRAS1	ENSSSCG00000024296	NFKB inhibitor interacting Ras like 1 [Source:NCBI gene;Acc:100620195]
CCR2	ENSSSCG00000024311	C-C motif chemokine receptor 2 [Source:NCBI gene;Acc:414372]
NOVA1	ENSSSCG00000024396	NOVA alternative splicing regulator 1 [Source:NCBI gene;Acc:100158068]
	ENSSSCG00000024402	pregnancy zone protein [Source:NCBI gene;Acc:100153288]
ST6GALNAC3	ENSSSCG00000024494	ST6 N-acetylgalactosaminide alpha-2,6-sialyltransferase 3 [Source:NCBI gene;Acc:100512173]
	ENSSSCG00000024495
AKAP6	ENSSSCG00000024517	A-kinase anchoring protein 6 [Source:NCBI gene;Acc:100155181]
	ENSSSCG00000024520	ATP binding cassette subfamily B member 4 [Source:NCBI gene;Acc:100144586]
PTPRH	ENSSSCG00000024567	protein tyrosine phosphatase receptor type H [Source:NCBI gene;Acc:100627245]
	ENSSSCG00000024765	guanylate cyclase soluble subunit beta-2 [Source:NCBI gene;Acc:100625149]
NR5A2	ENSSSCG00000024975	nuclear receptor subfamily 5 group A member 2 [Source:NCBI gene;Acc:100523688]
ICOS	ENSSSCG00000025042	inducible T cell costimulator [Source:NCBI gene;Acc:733597]
C16orf89	ENSSSCG00000025072	chromosome 3 C16orf89 homolog [Source:NCBI gene;Acc:100624690]
NEGR1	ENSSSCG00000025085	neuronal growth regulator 1 [Source:NCBI gene;Acc:106507646]
MCTP1	ENSSSCG00000025286	multiple C2 and transmembrane domain containing 1 [Source:NCBI gene;Acc:100522480]
CAMKV	ENSSSCG00000025416	CaM kinase like vesicle associated [Source:NCBI gene;Acc:100623981]
	ENSSSCG00000025468	ceruloplasmin (ferroxidase)-like [Source:NCBI gene;Acc:100158001]
	ENSSSCG00000025590
KMO	ENSSSCG00000025686	kynurenine 3-monooxygenase [Source:NCBI gene;Acc:397148]
FNDC5	ENSSSCG00000025834	fibronectin type III domain containing 5 [Source:NCBI gene;Acc:100622587]
HEPACAM2	ENSSSCG00000025870	HEPACAM family member 2 [Source:NCBI gene;Acc:100626473]
PRR3	ENSSSCG00000025892	proline rich 3 [Source:NCBI gene;Acc:100736978]
C6orf136	ENSSSCG00000025943	chromosome 7 C6orf136 homolog [Source:NCBI gene;Acc:100153952]
FAM83E	ENSSSCG00000025975	family with sequence similarity 83 member E [Source:NCBI gene;Acc:100626173]
TKTL2	ENSSSCG00000026079	transketolase like 2 [Source:HGNC Symbol;Acc:HGNC:25313]
GALNT5	ENSSSCG00000026146	polypeptide N-acetylgalactosaminyltransferase 5 [Source:NCBI gene;Acc:100627600]
ATP13A5	ENSSSCG00000026260	ATPase 13A5 [Source:NCBI gene;Acc:100154528]
	ENSSSCG00000026345	chloride channel protein ClC-Ka [Source:NCBI gene;Acc:100628082]
PADI2	ENSSSCG00000026478	peptidyl arginine deiminase 2 [Source:NCBI gene;Acc:100621356]
SLC38A4	ENSSSCG00000026597	solute carrier family 38 member 4 [Source:NCBI gene;Acc:100286742]
TNFSF14	ENSSSCG00000026695	TNF superfamily member 14 [Source:NCBI gene;Acc:100519468]
KLHL32	ENSSSCG00000027002	kelch like family member 32 [Source:NCBI gene;Acc:100621727]
SELRC1	ENSSSCG00000027119	Sel1 repeat containing 1 [Source:NCBI gene;Acc:100627075]
SIM2	ENSSSCG00000027179	SIM bHLH transcription factor 2 [Source:NCBI gene;Acc:100623917]
SLC35G1	ENSSSCG00000027230	solute carrier family 35 member G1 [Source:NCBI gene;Acc:100156133]
HHLA2	ENSSSCG00000027275	HERV-H LTR-associating 2 [Source:NCBI gene;Acc:102166962]
	ENSSSCG00000027677	ABI gene family member 3-like [Source:NCBI gene;Acc:110255205]
	ENSSSCG00000027678	coiled-coil domain containing 175 [Source:NCBI gene;Acc:100622158]
RNF183	ENSSSCG00000027688	ring finger protein 183 [Source:NCBI gene;Acc:100622036]
	ENSSSCG00000027874	ubiquilin-1-like [Source:NCBI gene;Acc:102167734]
CCDC154	ENSSSCG00000028139	coiled-coil domain containing 154 [Source:NCBI gene;Acc:100522069]
CATSPER3	ENSSSCG00000028294	cation channel sperm associated 3 [Source:NCBI gene;Acc:100622134]
DRD1	ENSSSCG00000029037	dopamine receptor D1 [Source:NCBI gene;Acc:100144487]
SH3BGR	ENSSSCG00000029219	SH3 domain binding glutamate rich protein [Source:NCBI gene;Acc:100626262]
THAP6	ENSSSCG00000029348	THAP domain containing 6 [Source:NCBI gene;Acc:100737143]
HUNK	ENSSSCG00000029392	hormonally up-regulated Neu-associated kinase [Source:NCBI gene;Acc:100627454]
ZNF569	ENSSSCG00000029420	zinc finger protein 569 [Source:NCBI gene;Acc:102164889]
SLC8A2	ENSSSCG00000029567	solute carrier family 8 member A2 [Source:NCBI gene;Acc:100519030]
AOX1	ENSSSCG00000029606	aldehyde oxidase 1 [Source:NCBI gene;Acc:100523701]
CYTIP	ENSSSCG00000029753	cytohesin 1 interacting protein [Source:NCBI gene;Acc:100627882]
ZNF461	ENSSSCG00000029875	zinc finger protein 461 [Source:NCBI gene;Acc:106510528]
SORCS1	ENSSSCG00000030026	sortilin related VPS10 domain containing receptor 1 [Source:NCBI gene;Acc:100155686]
ACSM4	ENSSSCG00000030033	acyl-CoA synthetase medium-chain family member 4 [Source:NCBI gene;Acc:100512595]
	ENSSSCG00000030277
NYAP1	ENSSSCG00000030337	neuronal tyrosine phosphorylated phosphoinositide-3-kinase adaptor 1 [Source:NCBI gene;Acc:100514396]
HILPDA	ENSSSCG00000031109	hypoxia inducible lipid droplet associated [Source:NCBI gene;Acc:449525]
	ENSSSCG00000031731
TNFAIP8L3	ENSSSCG00000031794	TNF alpha induced protein 8 like 3 [Source:NCBI gene;Acc:100522001]
	ENSSSCG00000031798	dynein axonemal heavy chain 3 [Source:NCBI gene;Acc:100738073]
	ENSSSCG00000031897	GTPase, IMAP family member 7 [Source:NCBI gene;Acc:106508189]
UGT8	ENSSSCG00000031904	UDP glycosyltransferase 8 [Source:NCBI gene;Acc:100511825]
KCNS2	ENSSSCG00000031917	potassium voltage-gated channel modifier subfamily S member 2 [Source:NCBI gene;Acc:100153957]
	ENSSSCG00000032113	cationic amino acid transporter 3-like [Source:NCBI gene;Acc:100523440]
	ENSSSCG00000032135	granulocyte-macrophage colony-stimulating factor receptor subunit alpha-like [Source:NCBI gene;Acc:110257903]
SAPCD2	ENSSSCG00000032279	suppressor APC domain containing 2 [Source:NCBI gene;Acc:110258072]
KDM5D	ENSSSCG00000032354	lysine-specific demethylase 5D-like [Source:NCBI gene;Acc:110257883]
TMEM52B	ENSSSCG00000032431	transmembrane protein 52B [Source:NCBI gene;Acc:100524496]
	ENSSSCG00000032591	interferon-induced transmembrane protein 1-like [Source:NCBI gene;Acc:102161418]
F11	ENSSSCG00000032653	coagulation factor XI [Source:NCBI gene;Acc:110257404]
DNAH7	ENSSSCG00000032814	dynein axonemal heavy chain 7 [Source:NCBI gene;Acc:100157866]
CDCA8	ENSSSCG00000032909	cell division cycle associated 8 [Source:NCBI gene;Acc:110261149]
BMERB1	ENSSSCG00000032956	bMERB domain containing 1 [Source:NCBI gene;Acc:100622402]
	ENSSSCG00000033006	magnesium dependent phosphatase 1 [Source:NCBI gene;Acc:100520440]
FBXO45	ENSSSCG00000033030	F-box protein 45 [Source:NCBI gene;Acc:110256404]
	ENSSSCG00000033050
GTF2A1L	ENSSSCG00000033106	general transcription factor IIA subunit 1 like [Source:NCBI gene;Acc:100519953]
	ENSSSCG00000033181	multidrug resistance-associated protein 4-like [Source:NCBI gene;Acc:100153359]
LYRM7	ENSSSCG00000033213	LYR motif containing 7 [Source:NCBI gene;Acc:100519080]
CABCOCO1	ENSSSCG00000033268	ciliary associated calcium binding coiled-coil 1 [Source:NCBI gene;Acc:100157740]
PGBD2	ENSSSCG00000033305	piggyBac transposable element derived 2 [Source:NCBI gene;Acc:110259306]
C7orf31	ENSSSCG00000033313	chromosome 18 C7orf31 homolog [Source:NCBI gene;Acc:100622673]
KCNK9	ENSSSCG00000033397	potassium two pore domain channel subfamily K member 9 [Source:NCBI gene;Acc:100152456]
SPC24	ENSSSCG00000033444	SPC24 component of NDC80 kinetochore complex [Source:NCBI gene;Acc:110259343]
SAMD11	ENSSSCG00000033509	sterile alpha motif domain containing 11 [Source:NCBI gene;Acc:102163932]
	ENSSSCG00000033560	serpin B3-like [Source:NCBI gene;Acc:110261633]
	ENSSSCG00000033637	chromosome 13 C3orf52 homolog [Source:NCBI gene;Acc:100626261]
	ENSSSCG00000033648	zinc finger protein 300-like [Source:NCBI gene;Acc:100520903]
DUSP18	ENSSSCG00000033833	dual specificity phosphatase 18 [Source:NCBI gene;Acc:100156909]
CD37	ENSSSCG00000033849	CD37 molecule [Source:NCBI gene;Acc:100624694]
DYNC2H1	ENSSSCG00000033937	dynein cytoplasmic 2 heavy chain 1 [Source:NCBI gene;Acc:100624195]
HNF4G	ENSSSCG00000034242	hepatocyte nuclear factor 4 gamma [Source:NCBI gene;Acc:110260272]
FIGN	ENSSSCG00000034262	fidgetin, microtubule severing factor [Source:NCBI gene;Acc:100736811]
LRMDA	ENSSSCG00000034308	leucine rich melanocyte differentiation associated [Source:HGNC Symbol;Acc:HGNC:23405]
H2AC20	ENSSSCG00000034598	histone H2A type 2-C [Source:NCBI gene;Acc:106510170]
	ENSSSCG00000034623	ADAM3b [Source:NCBI gene;Acc:100049687]
	ENSSSCG00000034719	zinc finger X-linked protein ZXDB [Source:NCBI gene;Acc:100511114]
	ENSSSCG00000034731	trefoil factor 1 [Source:NCBI gene;Acc:780401]
IRX1	ENSSSCG00000034884	iroquois homeobox 1 [Source:NCBI gene;Acc:110257264]
GDA	ENSSSCG00000034919	guanine deaminase [Source:NCBI gene;Acc:100621043]
	ENSSSCG00000034947
	ENSSSCG00000035105	dual specificity phosphatase 13 [Source:NCBI gene;Acc:100154205]
C16orf46	ENSSSCG00000035388	chromosome 6 C16orf46 homolog [Source:NCBI gene;Acc:110261259]
ZFP42	ENSSSCG00000035444	ZFP42 zinc finger protein [Source:NCBI gene;Acc:100627512]
SEZ6	ENSSSCG00000035445	seizure related 6 homolog [Source:NCBI gene;Acc:100518932]
	ENSSSCG00000035525	multiple epidermal growth factor-like domains protein 6 [Source:NCBI gene;Acc:100153543]
GKN1	ENSSSCG00000035529	gastrokine 1 [Source:NCBI gene;Acc:100502561]
	ENSSSCG00000035534
SUGCT	ENSSSCG00000035581	succinyl-CoA:glutarate-CoA transferase [Source:NCBI gene;Acc:102168155]
GIPC2	ENSSSCG00000035582	GIPC PDZ domain containing family member 2 [Source:NCBI gene;Acc:100625104]
GPR55	ENSSSCG00000035592	G protein-coupled receptor 55 [Source:NCBI gene;Acc:100517685]
C8orf34	ENSSSCG00000035887	chromosome 4 C8orf34 homolog [Source:NCBI gene;Acc:100524083]
DBX2	ENSSSCG00000035938	developing brain homeobox 2 [Source:NCBI gene;Acc:100738507]
AQP4	ENSSSCG00000035965	aquaporin 4 [Source:NCBI gene;Acc:100126277]
LMX1B	ENSSSCG00000035968	LIM homeobox transcription factor 1 beta [Source:NCBI gene;Acc:100157562]
KCNJ3	ENSSSCG00000036078	potassium inwardly rectifying channel subfamily J member 3 [Source:NCBI gene;Acc:396586]
	ENSSSCG00000036128
GJA8	ENSSSCG00000036239	gap junction protein alpha 8 [Source:NCBI gene;Acc:100736742]
ZSCAN2	ENSSSCG00000036356	zinc finger and SCAN domain containing 2 [Source:NCBI gene;Acc:100622996]
SLC43A1	ENSSSCG00000036359	solute carrier family 43 member 1 [Source:NCBI gene;Acc:110259260]
	ENSSSCG00000036417
	ENSSSCG00000036656
	ENSSSCG00000036685	olfactory receptor 7A17-like [Source:NCBI gene;Acc:106509673]
ZNF658	ENSSSCG00000036693	zinc finger protein 658 [Source:NCBI gene;Acc:110255680]
ALX1	ENSSSCG00000036744	ALX homeobox 1 [Source:NCBI gene;Acc:100525700]
	ENSSSCG00000036748	zinc finger protein 2 [Source:NCBI gene;Acc:100521785]
LRRC25	ENSSSCG00000036963	leucine rich repeat containing 25 [Source:NCBI gene;Acc:110259316]
PPM1N	ENSSSCG00000037001	protein phosphatase, Mg2+/Mn2+ dependent 1N (putative) [Source:NCBI gene;Acc:110261010]
CCDC166	ENSSSCG00000037038	coiled-coil domain containing 166 [Source:NCBI gene;Acc:100516437]
PPP1R27	ENSSSCG00000037039	protein phosphatase 1 regulatory subunit 27 [Source:NCBI gene;Acc:110255937]
PROKR2	ENSSSCG00000037063	prokineticin receptor 2 [Source:NCBI gene;Acc:100625714]
LANCL3	ENSSSCG00000037269	LanC like 3 [Source:NCBI gene;Acc:100626898]
FABP2	ENSSSCG00000037272	fatty acid binding protein 2 [Source:NCBI gene;Acc:595106]
	ENSSSCG00000037312	transmembrane protein 234 [Source:NCBI gene;Acc:100738478]
	ENSSSCG00000037347	R3H and coiled-coil domain-containing protein 1-like [Source:NCBI gene;Acc:110258721]
	ENSSSCG00000037377
TLCD5	ENSSSCG00000037406	TLC domain containing 5 [Source:NCBI gene;Acc:102162685]
COL6A6	ENSSSCG00000037430	collagen type VI alpha 6 chain [Source:NCBI gene;Acc:100516642]
	ENSSSCG00000037491	putative GTP-binding protein 6 [Source:NCBI gene;Acc:110258925]
ZSCAN23	ENSSSCG00000037512	zinc finger and SCAN domain containing 23 [Source:NCBI gene;Acc:100522500]
OPCML	ENSSSCG00000037534	opioid binding protein/cell adhesion molecule like [Source:NCBI gene;Acc:100738337]
DRC3	ENSSSCG00000037557	dynein regulatory complex subunit 3 [Source:NCBI gene;Acc:110256133]
H1-2	ENSSSCG00000037565	H1.2 linker histone, cluster member [Source:NCBI gene;Acc:574051]
	ENSSSCG00000037720
ZNF853	ENSSSCG00000037890	zinc finger protein 853 [Source:HGNC Symbol;Acc:HGNC:21767]
	ENSSSCG00000038067	small integral membrane protein 24 [Source:NCBI gene;Acc:100737370]
	ENSSSCG00000038095
SPDYC	ENSSSCG00000038112	speedy/RINGO cell cycle regulator family member C [Source:NCBI gene;Acc:100518768]
TIGD4	ENSSSCG00000038186	tigger transposable element derived 4 [Source:NCBI gene;Acc:397327]
MPST	ENSSSCG00000038190	mercaptopyruvate sulfurtransferase [Source:NCBI gene;Acc:100154490]
CACUL1	ENSSSCG00000038222	CDK2 associated cullin domain 1 [Source:NCBI gene;Acc:100737227]
RNF182	ENSSSCG00000038290	ring finger protein 182 [Source:NCBI gene;Acc:100154575]
ACTN3	ENSSSCG00000038323	actinin alpha 3 [Source:NCBI gene;Acc:100519531]
PIGK	ENSSSCG00000038329	phosphatidylinositol glycan anchor biosynthesis class K [Source:NCBI gene;Acc:606750]
	ENSSSCG00000038331	IQ motif containing N [Source:NCBI gene;Acc:110259318]
	ENSSSCG00000038364	mitochondrial ribosomal protein L23 [Source:NCBI gene;Acc:110259217]
TMLHE	ENSSSCG00000038442	trimethyllysine hydroxylase, epsilon [Source:NCBI gene;Acc:100515702]
KLHL7	ENSSSCG00000038469	kelch like family member 7 [Source:NCBI gene;Acc:100620936]
CHAC1	ENSSSCG00000038521	ChaC glutathione specific gamma-glutamylcyclotransferase 1 [Source:NCBI gene;Acc:100524723]
ARSB	ENSSSCG00000038535	arylsulfatase B [Source:NCBI gene;Acc:102158016]
ARMCX1	ENSSSCG00000038569	armadillo repeat containing X-linked 1 [Source:NCBI gene;Acc:100622470]
TLCD1	ENSSSCG00000038650	TLC domain containing 1 [Source:NCBI gene;Acc:100514185]
	ENSSSCG00000038702
TMEM223	ENSSSCG00000038711	transmembrane protein 223 [Source:NCBI gene;Acc:100620450]
	ENSSSCG00000038717	phenylalanyl-tRNA synthetase 2, mitochondrial [Source:NCBI gene;Acc:100625424]
C3orf70	ENSSSCG00000038724	chromosome 13 C3orf70 homolog [Source:NCBI gene;Acc:106504156]
	ENSSSCG00000038945
DNM3	ENSSSCG00000038958	dynamin 3 [Source:NCBI gene;Acc:100622420]
WNT7A	ENSSSCG00000039010	Wnt family member 7A [Source:NCBI gene;Acc:100153445]
ALKAL2	ENSSSCG00000039057	ALK and LTK ligand 2 [Source:NCBI gene;Acc:100516260]
	ENSSSCG00000039217	antigen WC1.1-like [Source:NCBI gene;Acc:110258535]
SLC38A8	ENSSSCG00000039218	solute carrier family 38 member 8 [Source:NCBI gene;Acc:110260902]
PHYH	ENSSSCG00000039244	phytanoyl-CoA 2-hydroxylase [Source:NCBI gene;Acc:100134962]
CLEC12A	ENSSSCG00000039287	C-type lectin domain family 12 member A [Source:NCBI gene;Acc:100520135]
MTPN	ENSSSCG00000039290	myotrophin [Source:NCBI gene;Acc:100521697]
FSTL1	ENSSSCG00000039426	follistatin like 1 [Source:NCBI gene;Acc:110256417]
RPL28	ENSSSCG00000039460	ribosomal protein L28 [Source:NCBI gene;Acc:110261057]
DNAL1	ENSSSCG00000039469	dynein axonemal light chain 1 [Source:NCBI gene;Acc:100156521]
	ENSSSCG00000039473	ubiquitin specific peptidase 32 [Source:NCBI gene;Acc:100737416]
PLEKHF2	ENSSSCG00000039549	pleckstrin homology and FYVE domain containing 2 [Source:NCBI gene;Acc:110260255]
RNF126	ENSSSCG00000039551	ring finger protein 126 [Source:NCBI gene;Acc:110259377]
	ENSSSCG00000039604	disintegrin and metalloproteinase domain-containing protein 20-like [Source:NCBI gene;Acc:110258839]
TWSG1	ENSSSCG00000039663	twisted gastrulation BMP signaling modulator 1 [Source:NCBI gene;Acc:100519317]
PATJ	ENSSSCG00000039793	PATJ crumbs cell polarity complex component [Source:NCBI gene;Acc:100524203]
UCK2	ENSSSCG00000039867	uridine-cytidine kinase 2 [Source:NCBI gene;Acc:110260302]
	ENSSSCG00000039894
	ENSSSCG00000039961	serine protease 33-like [Source:NCBI gene;Acc:110256121]
CLIC2	ENSSSCG00000039998	chloride intracellular channel 2 [Source:NCBI gene;Acc:100516055]
FAM155A	ENSSSCG00000040130	family with sequence similarity 155 member A [Source:NCBI gene;Acc:102159180]
NUPR1	ENSSSCG00000040162	nuclear protein 1, transcriptional regulator [Source:NCBI gene;Acc:110260086]
AFG1L	ENSSSCG00000040199	AFG1 like ATPase [Source:NCBI gene;Acc:100155926]
	ENSSSCG00000040273	ribosomal protein L35a [Source:NCBI gene;Acc:100514796]
SOD2	ENSSSCG00000040317	superoxide dismutase 2 [Source:NCBI gene;Acc:100154319]
COLEC12	ENSSSCG00000040397	collectin subfamily member 12 [Source:NCBI gene;Acc:102166764]
GPR19	ENSSSCG00000040400	G protein-coupled receptor 19 [Source:NCBI gene;Acc:100625907]
NDE1	ENSSSCG00000040479	nudE neurodevelopment protein 1 [Source:NCBI gene;Acc:100621632]
DMRT3	ENSSSCG00000040481	doublesex and mab-3 related transcription factor 3 [Source:NCBI gene;Acc:110255644]
	ENSSSCG00000040571	small integral membrane protein 20 [Source:NCBI gene;Acc:100622616]
SGTB	ENSSSCG00000040603	small glutamine rich tetratricopeptide repeat containing beta [Source:NCBI gene;Acc:100513246]
	ENSSSCG00000040632
DIO2	ENSSSCG00000040638	iodothyronine deiodinase 2 [Source:NCBI gene;Acc:414379]
MAPK3	ENSSSCG00000040682	mitogen-activated protein kinase 3 [Source:NCBI gene;Acc:445013]
	ENSSSCG00000040742
DUSP5	ENSSSCG00000040815	dual specificity phosphatase 5 [Source:NCBI gene;Acc:100157144]
AGBL2	ENSSSCG00000040838	ATP/GTP binding protein like 2 [Source:NCBI gene;Acc:100514151]
FAAP24	ENSSSCG00000040905	FA core complex associated protein 24 [Source:NCBI gene;Acc:100621643]
