# Supplementary material for: Identifying Candidate Genes for Short Gestation Length Trait in Chinese Qingping Pigs by Whole-Genome Resequencing and RNA Sequencing
Source: Front Genet. 2022 May 16;13:857705. doi: 10.3389/fgene.2022.857705 (PMC9159352; doi:10.3389/fgene.2022.857705)
Supplement: Supplementary file 6 [file Table5.XLSX]

## Sheet: summary
Table S5. Candidate genes of selective sweep analyses.
external_gene_name	ensembl_gene_id	description
MYO1A	ENSSSCG00000000413	myosin IA [Source:NCBI gene;Acc:100739662]
TAC3	ENSSSCG00000000418	tachykinin precursor 3 [Source:NCBI gene;Acc:492314]
ILRUN	ENSSSCG00000001527	inflammation and lipid regulator with UBA-like and NBR1-like domains [Source:NCBI gene;Acc:100512239]
WHAMM	ENSSSCG00000001805	WASP homolog associated with actin, golgi membranes and microtubules [Source:NCBI gene;Acc:100153988]
FSD2	ENSSSCG00000001806	fibronectin type III and SPRY domain containing 2 [Source:NCBI gene;Acc:100513991]
YLPM1	ENSSSCG00000002372	YLP motif containing 1 [Source:NCBI gene;Acc:100152380]
DLST	ENSSSCG00000002374	dihydrolipoamide S-succinyltransferase [Source:NCBI gene;Acc:397690]
RPS6KL1	ENSSSCG00000002375	ribosomal protein S6 kinase like 1 [Source:NCBI gene;Acc:100152357]
DLL3	ENSSSCG00000002987	delta like canonical Notch ligand 3 [Source:NCBI gene;Acc:100520433]
MEGF8	ENSSSCG00000003021	multiple EGF like domains 8 [Source:NCBI gene;Acc:100513862]
GRIK5	ENSSSCG00000003038	glutamate ionotropic receptor kainate type subunit 5 [Source:NCBI gene;Acc:100737141]
DMRTC2	ENSSSCG00000003043	DMRT like family C2 [Source:NCBI gene;Acc:100518666]
	ENSSSCG00000003045	ATPase Na+/K+ transporting subunit alpha 3 [Source:NCBI gene;Acc:100329126]
LIG1	ENSSSCG00000003128	DNA ligase 1 [Source:NCBI gene;Acc:100520434]
ZSWIM9	ENSSSCG00000003129	zinc finger SWIM-type containing 9 [Source:NCBI gene;Acc:102165016]
GRIN2D	ENSSSCG00000003133	glutamate ionotropic receptor NMDA type subunit 2D [Source:NCBI gene;Acc:100521797]
KCNJ14	ENSSSCG00000003135	potassium inwardly rectifying channel subfamily J member 14 [Source:NCBI gene;Acc:100521454]
CYTH2	ENSSSCG00000003136	cytohesin 2 [Source:NCBI gene;Acc:100240721]
TNFRSF9	ENSSSCG00000003386	TNF receptor superfamily member 9 [Source:NCBI gene;Acc:100519368]
ESCO1	ENSSSCG00000003700	establishment of sister chromatid cohesion N-acetyltransferase 1 [Source:NCBI gene;Acc:100524501]
TAF4B	ENSSSCG00000003718	TATA-box binding protein associated factor 4b [Source:NCBI gene;Acc:100037274]
CDH2	ENSSSCG00000003722	cadherin 2 [Source:NCBI gene;Acc:100515322]
ASXL3	ENSSSCG00000003736	ASXL transcriptional regulator 3 [Source:NCBI gene;Acc:100518495]
NOL4	ENSSSCG00000003737	nucleolar protein 4 [Source:NCBI gene;Acc:100518847]
	ENSSSCG00000004081
MTHFD1L	ENSSSCG00000004092	methylenetetrahydrofolate dehydrogenase (NADP+ dependent) 1 like [Source:NCBI gene;Acc:100154722]
BCKDHB	ENSSSCG00000004465	branched chain keto acid dehydrogenase E1 subunit beta [Source:NCBI gene;Acc:100142669]
SMAD4	ENSSSCG00000004524	SMAD family member 4 [Source:NCBI gene;Acc:397142]
TCF4	ENSSSCG00000004535	transcription factor 4 [Source:NCBI gene;Acc:100511671]
OAZ2	ENSSSCG00000004550	ornithine decarboxylase antizyme 2 [Source:HGNC Symbol;Acc:HGNC:8096]
ZNF609	ENSSSCG00000004551	zinc finger protein 609 [Source:NCBI gene;Acc:100517132]
TEX9	ENSSSCG00000004602	testis expressed 9 [Source:NCBI gene;Acc:100155694]
MYO5A	ENSSSCG00000004620	myosin VA [Source:NCBI gene;Acc:594849]
CEP152	ENSSSCG00000004657	centrosomal protein 152 [Source:NCBI gene;Acc:100152345]
SORD	ENSSSCG00000004679	sorbitol dehydrogenase [Source:NCBI gene;Acc:100158181]
UBR1	ENSSSCG00000004717	ubiquitin protein ligase E3 component n-recognin 1 [Source:NCBI gene;Acc:100511299]
RMDN3	ENSSSCG00000004765	regulator of microtubule dynamics 3 [Source:NCBI gene;Acc:100519696]
RAD51	ENSSSCG00000004766	RAD51 recombinase [Source:NCBI gene;Acc:100141309]
MEIS2	ENSSSCG00000004795	Meis homeobox 2 [Source:NCBI gene;Acc:100512756]
PGPEP1L	ENSSSCG00000004811	pyroglutamyl-peptidase I like [Source:NCBI gene;Acc:100518709]
TTC23	ENSSSCG00000004813	tetratricopeptide repeat domain 23 [Source:NCBI gene;Acc:100518888]
LRRC28	ENSSSCG00000004814	leucine rich repeat containing 28 [Source:NCBI gene;Acc:100156704]
TJP1	ENSSSCG00000004854	tight junction protein 1 [Source:NCBI gene;Acc:100736682]
TSHZ1	ENSSSCG00000004861	teashirt zinc finger homeobox 1 [Source:NCBI gene;Acc:100152487]
AAGAB	ENSSSCG00000004951	alpha and gamma adaptin binding protein [Source:NCBI gene;Acc:100517743]
EXOC5	ENSSSCG00000005066	exocyst complex component 5 [Source:NCBI gene;Acc:100513903]
TOMM20L	ENSSSCG00000005075	translocase of outer mitochondrial membrane 20 like [Source:NCBI gene;Acc:100515293]
KIAA0586	ENSSSCG00000005076	KIAA0586 ortholog [Source:NCBI gene;Acc:100516532]
	ENSSSCG00000005172
TMC1	ENSSSCG00000005266	transmembrane channel like 1 [Source:NCBI gene;Acc:100516949]
STRBP	ENSSSCG00000005582	spermatid perinuclear RNA binding protein [Source:NCBI gene;Acc:100511979]
GPT	ENSSSCG00000005901	glutamic--pyruvic transaminase [Source:NCBI gene;Acc:100524618]
TMEM74	ENSSSCG00000006031	transmembrane protein 74 [Source:NCBI gene;Acc:100525987]
NCALD	ENSSSCG00000006059	neurocalcin delta [Source:NCBI gene;Acc:100156785]
RNF19A	ENSSSCG00000006066	ring finger protein 19A, RBR E3 ubiquitin protein ligase [Source:NCBI gene;Acc:654326]
RGS22	ENSSSCG00000006069	regulator of G protein signaling 22 [Source:NCBI gene;Acc:100154772]
TMEM67	ENSSSCG00000006108	transmembrane protein 67 [Source:NCBI gene;Acc:100515024]
OTUD6B	ENSSSCG00000006120	OTU deubiquitinase 6B [Source:NCBI gene;Acc:100157831]
RALYL	ENSSSCG00000006149	RALY RNA binding protein-like [Source:NCBI gene;Acc:100739123]
KCNB2	ENSSSCG00000006185	potassium voltage-gated channel subfamily B member 2 [Source:NCBI gene;Acc:102162828]
LYN	ENSSSCG00000006250	LYN proto-oncogene, Src family tyrosine kinase [Source:NCBI gene;Acc:100152890]
RCSD1	ENSSSCG00000006307	RCSD domain containing 1 [Source:NCBI gene;Acc:100152372]
DDR2	ENSSSCG00000006338	discoidin domain receptor tyrosine kinase 2 [Source:NCBI gene;Acc:100154199]
CD48	ENSSSCG00000006379	CD48 molecule [Source:NCBI gene;Acc:100511130]
ATP1A1	ENSSSCG00000006740	ATPase Na+/K+ transporting subunit alpha 1 [Source:NCBI gene;Acc:397481]
NINL	ENSSSCG00000007135	ninein like [Source:NCBI gene;Acc:100519522]
NOL4L	ENSSSCG00000007249	COMM domain containing 7 [Source:NCBI gene;Acc:100514995]
SNRNP25	ENSSSCG00000007962	small nuclear ribonucleoprotein U11/U12 subunit 25 [Source:NCBI gene;Acc:100517703]
RHBDF1	ENSSSCG00000007968	rhomboid 5 homolog 1 [Source:NCBI gene;Acc:100517883]
POLR3K	ENSSSCG00000007970	RNA polymerase III subunit K [Source:NCBI gene;Acc:100521261]
CENPP	ENSSSCG00000008070	centromere protein P [Source:NCBI gene;Acc:100623867]
CARD19	ENSSSCG00000008077	caspase recruitment domain family member 19 [Source:NCBI gene;Acc:100514222]
	ENSSSCG00000008686	chromosome 8 C4orf48 homolog [Source:NCBI gene;Acc:100515739]
	ENSSSCG00000008748	ligand dependent nuclear receptor corepressor like [Source:NCBI gene;Acc:100337668]
TMEM144	ENSSSCG00000008874	transmembrane protein 144 [Source:NCBI gene;Acc:100516327]
RAPGEF2	ENSSSCG00000008881	Rap guanine nucleotide exchange factor 2 [Source:NCBI gene;Acc:100517409]
CENPC	ENSSSCG00000008921	centromere protein C [Source:NCBI gene;Acc:100737668]
STAP1	ENSSSCG00000008923	signal transducing adaptor family member 1 [Source:NCBI gene;Acc:100525760]
UBA6	ENSSSCG00000008924	ubiquitin like modifier activating enzyme 6 [Source:NCBI gene;Acc:100512547]
TMPRSS11B	ENSSSCG00000008932	transmembrane protease serine 11B [Source:NCBI gene;Acc:100513484]
SLC4A4	ENSSSCG00000008943	solute carrier family 4 member 4 [Source:NCBI gene;Acc:503546]
	ENSSSCG00000008990	mitochondrial ribosomal protein L1 [Source:NCBI gene;Acc:100513028]
LRBA	ENSSSCG00000009021	LPS responsive beige-like anchor protein [Source:NCBI gene;Acc:100519671]
SPRY1	ENSSSCG00000009083	sprouty RTK signaling antagonist 1 [Source:NCBI gene;Acc:100623283]
TNIP3	ENSSSCG00000009100	TNFAIP3 interacting protein 3 [Source:NCBI gene;Acc:100738704]
TET2	ENSSSCG00000009157	tet methylcytosine dioxygenase 2 [Source:NCBI gene;Acc:100521465]
	ENSSSCG00000009568	zinc finger MYM-type containing 5 [Source:NCBI gene;Acc:100520328]
B3GNT4	ENSSSCG00000009798	UDP-GlcNAc:betaGal beta-1,3-N-acetylglucosaminyltransferase 4 [Source:NCBI gene;Acc:100736645]
DIABLO	ENSSSCG00000009799	diablo IAP-binding mitochondrial protein [Source:NCBI gene;Acc:100155744]
GPN3	ENSSSCG00000009820	GPN-loop GTPase 3 [Source:NCBI gene;Acc:100158156]
TAOK3	ENSSSCG00000009850	TAO kinase 3 [Source:NCBI gene;Acc:100154763]
MED13L	ENSSSCG00000009864	mediator complex subunit 13L [Source:NCBI gene;Acc:100151978]
MAPKAPK5	ENSSSCG00000009890	MAPK activated protein kinase 5 [Source:NCBI gene;Acc:100153404]
BICDL1	ENSSSCG00000009896	BICD family like cargo adaptor 1 [Source:NCBI gene;Acc:100153008]
NAV1	ENSSSCG00000010915	neuron navigator 1 [Source:NCBI gene;Acc:100525121]
CUL2	ENSSSCG00000011104	cullin 2 [Source:NCBI gene;Acc:100512186]
SUSD4	ENSSSCG00000011176	sushi domain containing 4 [Source:NCBI gene;Acc:100516995]
FYCO1	ENSSSCG00000011317	FYVE and coiled-coil domain autophagy adaptor 1 [Source:NCBI gene;Acc:100151740]
RBM6	ENSSSCG00000011394	RNA binding motif protein 6 [Source:NCBI gene;Acc:100515053]
RBM5	ENSSSCG00000011395	RNA binding motif protein 5 [Source:NCBI gene;Acc:100515237]
SEMA3F	ENSSSCG00000011398	semaphorin 3F [Source:NCBI gene;Acc:100153225]
DOCK3	ENSSSCG00000011416	dedicator of cytokinesis 3 [Source:NCBI gene;Acc:100519389]
DCAF1	ENSSSCG00000011417	DDB1 and CUL4 associated factor 1 [Source:NCBI gene;Acc:100519566]
PRICKLE2	ENSSSCG00000011495	prickle planar cell polarity protein 2 [Source:NCBI gene;Acc:100520050]
MITF	ENSSSCG00000011514	melanocyte inducing transcription factor [Source:NCBI gene;Acc:414902]
STAG1	ENSSSCG00000011652	stromal antigen 1 [Source:NCBI gene;Acc:100525610]
SERPINI2	ENSSSCG00000011737	serpin family I member 2 [Source:NCBI gene;Acc:100516831]
FXR1	ENSSSCG00000011769	FMR1 autosomal homolog 1 [Source:NCBI gene;Acc:100525539]
TPRG1	ENSSSCG00000011812	tumor protein p63 regulated 1 [Source:NCBI gene;Acc:100519924]
	ENSSSCG00000012006	multidrug resistance-associated protein 1 [Source:NCBI gene;Acc:100152428]
NCAM2	ENSSSCG00000012020	neural cell adhesion molecule 2 [Source:NCBI gene;Acc:100737392]
SBF2	ENSSSCG00000013409	SET binding factor 2 [Source:NCBI gene;Acc:100521123]
LSM7	ENSSSCG00000013463	LSM7 homolog, U6 small nuclear RNA and mRNA degradation associated [Source:NCBI gene;Acc:100515470]
MPND	ENSSSCG00000013507	MPN domain containing [Source:NCBI gene;Acc:100524132]
SH3GL1	ENSSSCG00000013508	SH3 domain containing GRB2 like 1, endophilin A2 [Source:NCBI gene;Acc:100523947]
	ENSSSCG00000013568	Rho/Rac guanine nucleotide exchange factor 18 [Source:NCBI gene;Acc:100511004]
PEX11G	ENSSSCG00000013569	peroxisomal biogenesis factor 11 gamma [Source:NCBI gene;Acc:100511182]
MXD3	ENSSSCG00000014041	MAX dimerization protein 3 [Source:NCBI gene;Acc:100512157]
NSD1	ENSSSCG00000014044	nuclear receptor binding SET domain protein 1 [Source:NCBI gene;Acc:100524976]
HK3	ENSSSCG00000014048	hexokinase 3 [Source:NCBI gene;Acc:100522855]
PAM	ENSSSCG00000014184	peptidylglycine alpha-amidating monooxygenase [Source:NCBI gene;Acc:100526040]
CDK14	ENSSSCG00000015307	cyclin dependent kinase 14 [Source:NCBI gene;Acc:100515962]
ANKIB1	ENSSSCG00000015314	ankyrin repeat and IBR domain containing 1 [Source:NCBI gene;Acc:100517844]
DGKB	ENSSSCG00000015355	diacylglycerol kinase beta [Source:NCBI gene;Acc:100625799]
CACNA2D1	ENSSSCG00000015402	calcium voltage-gated channel auxiliary subunit alpha2delta 1 [Source:NCBI gene;Acc:397377]
FMNL2	ENSSSCG00000015866	formin like 2 [Source:NCBI gene;Acc:100518696]
ARL6IP6	ENSSSCG00000015868	ADP ribosylation factor like GTPase 6 interacting protein 6 [Source:NCBI gene;Acc:100152698]
NR4A2	ENSSSCG00000015871	nuclear receptor subfamily 4 group A member 2 [Source:NCBI gene;Acc:100157120]
NEUROD1	ENSSSCG00000016011	neuronal differentiation 1 [Source:NCBI gene;Acc:397283]
WDR75	ENSSSCG00000016036	WD repeat domain 75 [Source:NCBI gene;Acc:100511538]
PMS1	ENSSSCG00000016045	PMS1 homolog 1, mismatch repair system component [Source:NCBI gene;Acc:100513383]
PARD3B	ENSSSCG00000016123	par-3 family cell polarity regulator beta [Source:NCBI gene;Acc:100738793]
FARP2	ENSSSCG00000016368	FERM, ARH/RhoGEF and pleckstrin domain protein 2 [Source:NCBI gene;Acc:100511480]
SEPTIN2	ENSSSCG00000016370	septin 2 [Source:NCBI gene;Acc:100510936]
KLF14	ENSSSCG00000016550	Kruppel like factor 14 [Source:NCBI gene;Acc:100174956]
MEST	ENSSSCG00000016554	mesoderm specific transcript [Source:NCBI gene;Acc:100147710]
CEP41	ENSSSCG00000016556	centrosomal protein 41 [Source:NCBI gene;Acc:100513768]
ZC3HC1	ENSSSCG00000016565	zinc finger C3HC-type containing 1 [Source:NCBI gene;Acc:100516654]
PDE4D	ENSSSCG00000016929	phosphodiesterase 4D [Source:NCBI gene;Acc:100037967]
RNF180	ENSSSCG00000016941	ring finger protein 180 [Source:NCBI gene;Acc:100526254]
ERBIN	ENSSSCG00000016954	erbb2 interacting protein [Source:NCBI gene;Acc:100511418]
BDP1	ENSSSCG00000016968	B double prime 1, subunit of RNA polymerase III transcription initiation factor IIIB [Source:NCBI gene;Acc:100517687]
MCCC2	ENSSSCG00000016971	methylcrotonoyl-CoA carboxylase 2 [Source:NCBI gene;Acc:100518224]
DOCK2	ENSSSCG00000017008	dedicator of cytokinesis 2 [Source:NCBI gene;Acc:100512021]
INSYN2B	ENSSSCG00000017010	inhibitory synaptic factor family member 2B [Source:NCBI gene;Acc:100511664]
SGCD	ENSSSCG00000017063	sarcoglycan delta [Source:NCBI gene;Acc:100240724]
TANC2	ENSSSCG00000017298	tetratricopeptide repeat, ankyrin repeat and coiled-coil containing 2 [Source:NCBI gene;Acc:100515233]
MYH8	ENSSSCG00000018005	myosin-8 [Source:NCBI gene;Acc:110255887]
COPS3	ENSSSCG00000018051	COP9 signalosome subunit 3 [Source:NCBI gene;Acc:100512312]
MIR335	ENSSSCG00000018951	microRNA mir-335 [Source:NCBI gene;Acc:100498749]
U6	ENSSSCG00000019908	U6 spliceosomal RNA [Source:RFAM;Acc:RF00026]
TMEM192	ENSSSCG00000020868	transmembrane protein 192 [Source:NCBI gene;Acc:100512847]
CNOT4	ENSSSCG00000021354	CCR4-NOT transcription complex subunit 4 [Source:NCBI gene;Acc:100622832]
SATB2	ENSSSCG00000021657	SATB homeobox 2 [Source:NCBI gene;Acc:102160784]
GNB1	ENSSSCG00000021890	G protein subunit beta 1 [Source:NCBI gene;Acc:110261346]
CYP7B1	ENSSSCG00000022092	25-hydroxycholesterol 7-alpha-hydroxylase-like [Source:NCBI gene;Acc:100738003]
AGRN	ENSSSCG00000022204	agrin [Source:NCBI gene;Acc:100621139]
NOP58	ENSSSCG00000022225	NOP58 ribonucleoprotein [Source:NCBI gene;Acc:100156132]
UBR5	ENSSSCG00000022479	ubiquitin protein ligase E3 component n-recognin 5 [Source:NCBI gene;Acc:100157625]
CDON	ENSSSCG00000022504	cell adhesion associated, oncogene regulated [Source:NCBI gene;Acc:100622989]
UIMC1	ENSSSCG00000022508	ubiquitin interaction motif containing 1 [Source:NCBI gene;Acc:100037949]
	ENSSSCG00000022686	olfactory receptor 10T2 [Source:NCBI gene;Acc:100626697]
	ENSSSCG00000023324	lysine methyltransferase 2A [Source:NCBI gene;Acc:100623006]
PLA2G4A	ENSSSCG00000023351	phospholipase A2 group IVA [Source:NCBI gene;Acc:100520687]
	ENSSSCG00000023426	alpha-fetoprotein-like [Source:NCBI gene;Acc:102166306]
SUPT5H	ENSSSCG00000023556	SPT5 homolog, DSIF elongation factor subunit [Source:NCBI gene;Acc:100623068]
TECTA	ENSSSCG00000023728	tubulin-specific chaperone cofactor E-like protein [Source:NCBI gene;Acc:100523684]
AGPS	ENSSSCG00000023983	alkylglycerone phosphate synthase [Source:NCBI gene;Acc:100627169]
TRIP12	ENSSSCG00000024373	thyroid hormone receptor interactor 12 [Source:NCBI gene;Acc:100622166]
ANKRD17	ENSSSCG00000024592	ankyrin repeat domain 17 [Source:NCBI gene;Acc:100520501]
SEC22A	ENSSSCG00000024904	SEC22 homolog A, vesicle trafficking protein [Source:NCBI gene;Acc:100517559]
SREBF2	ENSSSCG00000026092	sterol regulatory element binding transcription factor 2 [Source:NCBI gene;Acc:396675]
EPHB3	ENSSSCG00000026516	EPH receptor B3 [Source:NCBI gene;Acc:100337659]
RER1	ENSSSCG00000026626	retention in endoplasmic reticulum sorting receptor 1 [Source:NCBI gene;Acc:100624036]
PTPRN2	ENSSSCG00000026661	protein tyrosine phosphatase receptor type N2 [Source:NCBI gene;Acc:102158899]
	ENSSSCG00000026816	tyrosine-protein phosphatase non-receptor type 11-like [Source:NCBI gene;Acc:100620540]
CACNA2D3	ENSSSCG00000027019	calcium voltage-gated channel auxiliary subunit alpha2delta 3 [Source:NCBI gene;Acc:100153986]
CENPH	ENSSSCG00000027147	centromere protein H [Source:NCBI gene;Acc:100736772]
FSTL5	ENSSSCG00000027183	follistatin like 5 [Source:NCBI gene;Acc:100738432]
RSRC1	ENSSSCG00000027556	arginine and serine rich coiled-coil 1 [Source:NCBI gene;Acc:100620876]
	ENSSSCG00000027916	peroxisomal biogenesis factor 10 [Source:NCBI gene;Acc:100736805]
POU2F3	ENSSSCG00000028237	POU class 2 homeobox 3 [Source:NCBI gene;Acc:397514]
USP3	ENSSSCG00000028737	ubiquitin specific peptidase 3 [Source:NCBI gene;Acc:100624494]
MEF2A	ENSSSCG00000028771	myocyte enhancer factor 2A [Source:NCBI gene;Acc:100037273]
TNIK	ENSSSCG00000028905	TRAF2 and NCK interacting kinase [Source:NCBI gene;Acc:100233204]
SMCHD1	ENSSSCG00000029030	structural maintenance of chromosomes flexible hinge domain containing 1 [Source:NCBI gene;Acc:100627122]
CENPJ	ENSSSCG00000029393	centromere protein J [Source:NCBI gene;Acc:106504774]
NAB1	ENSSSCG00000029547	NGFI-A binding protein 1 [Source:NCBI gene;Acc:100151855]
NFATC3	ENSSSCG00000029578	dihydrouridine synthase 2 [Source:NCBI gene;Acc:100621573]
VWA8	ENSSSCG00000029837	von Willebrand factor A domain containing 8 [Source:NCBI gene;Acc:100511470]
KLF7	ENSSSCG00000029998	Kruppel like factor 7 [Source:NCBI gene;Acc:100038003]
CYP19A1	ENSSSCG00000030168	cytochrome P450 19A1 [Source:NCBI gene;Acc:403331]
DEDD2	ENSSSCG00000030182	death effector domain containing 2 [Source:NCBI gene;Acc:100516271]
USP31	ENSSSCG00000030424	ubiquitin specific peptidase 31 [Source:NCBI gene;Acc:102162297]
IGF1R	ENSSSCG00000030560	insulin like growth factor 1 receptor [Source:NCBI gene;Acc:397350]
HOXC6	ENSSSCG00000030585	homeobox C6 [Source:NCBI gene;Acc:100627932]
FAM110D	ENSSSCG00000031074	family with sequence similarity 110 member D [Source:NCBI gene;Acc:100627555]
GAP43	ENSSSCG00000031244	growth associated protein 43 [Source:NCBI gene;Acc:100623423]
SFT2D2	ENSSSCG00000031617	SFT2 domain containing 2 [Source:NCBI gene;Acc:100157189]
MED22	ENSSSCG00000031941	mediator complex subunit 22 [Source:NCBI gene;Acc:110256515]
	ENSSSCG00000031991	glutaredoxin 2 [Source:NCBI gene;Acc:100511215]
SURF6	ENSSSCG00000032106	surfeit 6 [Source:NCBI gene;Acc:110256504]
TCF20	ENSSSCG00000032171	transcription factor 20 [Source:HGNC Symbol;Acc:HGNC:11631]
MYO3B	ENSSSCG00000032177	myosin IIIB [Source:NCBI gene;Acc:100621555]
TMEM39B	ENSSSCG00000032563	transmembrane protein 39B [Source:NCBI gene;Acc:110261131]
CMTM4	ENSSSCG00000032632	CKLF like MARVEL transmembrane domain containing 4 [Source:NCBI gene;Acc:110260935]
ALAD	ENSSSCG00000032787	aminolevulinate dehydratase [Source:NCBI gene;Acc:100621486]
CYP2S1	ENSSSCG00000032803	cytochrome P450 2S1 [Source:NCBI gene;Acc:106510546]
	ENSSSCG00000032896
ZC3H7B	ENSSSCG00000033036	zinc finger CCCH-type containing 7B [Source:NCBI gene;Acc:110260632]
	ENSSSCG00000033104	uncharacterized LOC106504483 [Source:NCBI gene;Acc:106504483]
YTHDF3	ENSSSCG00000033144	YTH N6-methyladenosine RNA binding protein 3 [Source:NCBI gene;Acc:106510070]
SLC7A6OS	ENSSSCG00000033167	solute carrier family 7 member 6 opposite strand [Source:NCBI gene;Acc:110260949]
	ENSSSCG00000033395
	ENSSSCG00000033533
SREBF1	ENSSSCG00000033626	sterol regulatory element binding transcription factor 1 [Source:NCBI gene;Acc:397308]
	ENSSSCG00000033721	uncharacterized LOC102158035 [Source:NCBI gene;Acc:102158035]
	ENSSSCG00000033808
C2orf88	ENSSSCG00000033941	chromosome 15 C2orf88 homolog [Source:NCBI gene;Acc:106506310]
DIDO1	ENSSSCG00000033946	death inducer-obliterator 1 [Source:NCBI gene;Acc:110257485]
ssc-mir-33b	ENSSSCG00000033948	ssc-mir-33b [Source:miRBase;Acc:MI0036557]
ZNF407	ENSSSCG00000033971	zinc finger protein 407 [Source:NCBI gene;Acc:100152080]
GID8	ENSSSCG00000034173	GID complex subunit 8 homolog [Source:NCBI gene;Acc:100625042]
HNF4G	ENSSSCG00000034242	hepatocyte nuclear factor 4 gamma [Source:NCBI gene;Acc:110260272]
MAP2K3	ENSSSCG00000034379	mitogen-activated protein kinase kinase 3 [Source:NCBI gene;Acc:110256149]
TRIP13	ENSSSCG00000034522	thyroid hormone receptor interactor 13 [Source:NCBI gene;Acc:100337674]
METTL4	ENSSSCG00000034816	methyltransferase like 4 [Source:NCBI gene;Acc:110261174]
RAP1GAP2	ENSSSCG00000034858	RAP1 GTPase activating protein 2 [Source:NCBI gene;Acc:100624704]
GDA	ENSSSCG00000034919	guanine deaminase [Source:NCBI gene;Acc:100621043]
IQCH	ENSSSCG00000034963	IQ motif containing H [Source:NCBI gene;Acc:102166010]
DOCK1	ENSSSCG00000035045	dedicator of cytokinesis 1 [Source:NCBI gene;Acc:100524831]
BRD9	ENSSSCG00000035118	bromodomain containing 9 [Source:NCBI gene;Acc:110257346]
	ENSSSCG00000035223	synemin [Source:NCBI gene;Acc:100623833]
	ENSSSCG00000035750
SHISA8	ENSSSCG00000035755	shisa family member 8 [Source:NCBI gene;Acc:102163410]
SUMO1	ENSSSCG00000035842	small ubiquitin like modifier 1 [Source:NCBI gene;Acc:100127139]
C8orf34	ENSSSCG00000035887	chromosome 4 C8orf34 homolog [Source:NCBI gene;Acc:100524083]
RPL7A	ENSSSCG00000035904	ribosomal protein L7a [Source:NCBI gene;Acc:110255317]
BHLHE40	ENSSSCG00000036136	basic helix-loop-helix family member e40 [Source:NCBI gene;Acc:100514873]
	ENSSSCG00000036234	glutamate decarboxylase 1-like [Source:NCBI gene;Acc:110261667]
CTNNA3	ENSSSCG00000036480	catenin alpha 3 [Source:NCBI gene;Acc:100153974]
FAM237A	ENSSSCG00000036691	family with sequence similarity 237 member A [Source:NCBI gene;Acc:110257205]
CAMTA1	ENSSSCG00000036772	calmodulin binding transcription activator 1 [Source:NCBI gene;Acc:102160515]
POU2F2	ENSSSCG00000037132	POU class 2 homeobox 2 [Source:NCBI gene;Acc:397105]
SNX29	ENSSSCG00000037232	sorting nexin 29 [Source:NCBI gene;Acc:100626399]
BTBD9	ENSSSCG00000037507	BTB domain containing 9 [Source:NCBI gene;Acc:100156900]
MTF1	ENSSSCG00000037516	metal regulatory transcription factor 1 [Source:NCBI gene;Acc:100511998]
NR3C2	ENSSSCG00000037766	nuclear receptor subfamily 3 group C member 2 [Source:NCBI gene;Acc:100620970]
IFN-OMEGA-5	ENSSSCG00000038075	interferon omega 7 [Source:NCBI gene;Acc:100154098]
AGPAT3	ENSSSCG00000038081	1-acylglycerol-3-phosphate O-acyltransferase 3 [Source:NCBI gene;Acc:100233171]
ADAMTS17	ENSSSCG00000038452	ADAM metallopeptidase with thrombospondin type 1 motif 17 [Source:NCBI gene;Acc:102160867]
TMPO	ENSSSCG00000038487	thymopoietin [Source:NCBI gene;Acc:100512350]
LPIN2	ENSSSCG00000038494	lipin 2 [Source:NCBI gene;Acc:100187579]
HOXC8	ENSSSCG00000038644	homeobox C8 [Source:NCBI gene;Acc:100739594]
CCDC178	ENSSSCG00000038703	coiled-coil domain containing 178 [Source:NCBI gene;Acc:102161644]
	ENSSSCG00000038715	folliculin [Source:NCBI gene;Acc:110256140]
GPR107	ENSSSCG00000038868	G protein-coupled receptor 107 [Source:NCBI gene;Acc:100521766]
	ENSSSCG00000039118
SERPINB12	ENSSSCG00000039151	serpin family B member 12 [Source:NCBI gene;Acc:110257004]
	ENSSSCG00000039367
KCNQ1	ENSSSCG00000039556	potassium voltage-gated channel subfamily Q member 1 [Source:NCBI gene;Acc:397326]
	ENSSSCG00000039660
	ENSSSCG00000040009
	ENSSSCG00000040100
MDFIC2	ENSSSCG00000040266	MyoD family inhibitor domain containing 2 [Source:NCBI gene;Acc:102167462]
C3orf20	ENSSSCG00000040594	chromosome 13 C3orf20 homolog [Source:NCBI gene;Acc:102167700]
	ENSSSCG00000040677
	ENSSSCG00000040694
LRP2	ENSSSCG00000040746	LDL receptor related protein 2 [Source:NCBI gene;Acc:100519689]
	ENSSSCG00000041213
	ENSSSCG00000041299
	ENSSSCG00000041321
	ENSSSCG00000041374
	ENSSSCG00000041646
	ENSSSCG00000041649
C1orf232	ENSSSCG00000041671	chromosome 1 open reading frame 230 [Source:HGNC Symbol;Acc:HGNC:53426]
	ENSSSCG00000041859
	ENSSSCG00000041925
	ENSSSCG00000042013
	ENSSSCG00000042106
	ENSSSCG00000042603
	ENSSSCG00000042616
GNAT1	ENSSSCG00000042718	G protein subunit alpha transducin 1 [Source:NCBI gene;Acc:100157237]
	ENSSSCG00000042796
	ENSSSCG00000042923
	ENSSSCG00000043739
	ENSSSCG00000044082
	ENSSSCG00000044403
	ENSSSCG00000044422
	ENSSSCG00000044601
FMN1	ENSSSCG00000044690	formin 1 [Source:NCBI gene;Acc:102159471]
	ENSSSCG00000044946
	ENSSSCG00000044951
	ENSSSCG00000045013
	ENSSSCG00000045227
	ENSSSCG00000045586
	ENSSSCG00000045589
	ENSSSCG00000045676
	ENSSSCG00000045693
	ENSSSCG00000045736
	ENSSSCG00000045895
	ENSSSCG00000045905
	ENSSSCG00000045992
	ENSSSCG00000046403
	ENSSSCG00000046438
	ENSSSCG00000046702
	ENSSSCG00000046831
U2	ENSSSCG00000046855	U2 spliceosomal RNA [Source:RFAM;Acc:RF00004]
	ENSSSCG00000047417
	ENSSSCG00000047617
	ENSSSCG00000047947
	ENSSSCG00000048009
	ENSSSCG00000048263
	ENSSSCG00000048265	proline-rich protein 18-like [Source:NCBI gene;Acc:106508382]
	ENSSSCG00000048562
	ENSSSCG00000049096
	ENSSSCG00000049307
	ENSSSCG00000049398
	ENSSSCG00000049645
	ENSSSCG00000049854
	ENSSSCG00000049899
	ENSSSCG00000050357
	ENSSSCG00000050697
	ENSSSCG00000050919
	ENSSSCG00000050947
	ENSSSCG00000050967
	ENSSSCG00000051251
	ENSSSCG00000051482
	ENSSSCG00000051645
KIAA0930	ENSSSCG00000000018	KIAA0930 ortholog [Source:NCBI gene;Acc:100736589]
SULT4A1	ENSSSCG00000000026	sulfotransferase family 4A member 1 [Source:NCBI gene;Acc:100523243]
POLDIP3	ENSSSCG00000000039	DNA polymerase delta interacting protein 3 [Source:NCBI gene;Acc:100525164]
ST13	ENSSSCG00000000071	ST13 Hsp70 interacting protein [Source:NCBI gene;Acc:100624451]
	ENSSSCG00000000097	translocase of outer mitochondrial membrane 22 [Source:NCBI gene;Acc:100520786]
CKAP4	ENSSSCG00000000171	cytoskeleton associated protein 4 [Source:NCBI gene;Acc:100523493]
SCN8A	ENSSSCG00000000228	sodium voltage-gated channel alpha subunit 8 [Source:NCBI gene;Acc:100522189]
	ENSSSCG00000000231	ankyrin repeat domain 33 [Source:NCBI gene;Acc:100522737]
KRT18	ENSSSCG00000000253	keratin 18 [Source:NCBI gene;Acc:100126286]
TESPA1	ENSSSCG00000000299	thymocyte expressed, positive selection associated 1 [Source:NCBI gene;Acc:100153079]
ATP23	ENSSSCG00000000453	ATP23 metallopeptidase and ATP synthase assembly factor homolog [Source:NCBI gene;Acc:100737094]
LEMD3	ENSSSCG00000000469	LEM domain containing 3 [Source:NCBI gene;Acc:100511508]
CNOT2	ENSSSCG00000000502	CCR4-NOT transcription complex subunit 2 [Source:NCBI gene;Acc:100153354]
PTPRB	ENSSSCG00000000504	protein tyrosine phosphatase receptor type B [Source:NCBI gene;Acc:100156181]
TRHDE	ENSSSCG00000000515	thyrotropin releasing hormone degrading enzyme [Source:NCBI gene;Acc:100620702]
KCNC2	ENSSSCG00000000516	potassium voltage-gated channel subfamily C member 2 [Source:NCBI gene;Acc:100153996]
SYT10	ENSSSCG00000000527	synaptotagmin 10 [Source:NCBI gene;Acc:100158038]
BICD1	ENSSSCG00000000531	BICD cargo adaptor 1 [Source:NCBI gene;Acc:100511132]
IPO8	ENSSSCG00000000534	importin 8 [Source:NCBI gene;Acc:100511694]
ERGIC2	ENSSSCG00000000536	ERGIC and golgi 2 [Source:NCBI gene;Acc:100512051]
OVCH1	ENSSSCG00000000540	ovochymase 1 [Source:NCBI gene;Acc:100512535]
FAR2	ENSSSCG00000000541	fatty acyl-CoA reductase 2 [Source:NCBI gene;Acc:100512348]
SMCO2	ENSSSCG00000000550	single-pass membrane protein with coiled-coil domains 2 [Source:NCBI gene;Acc:100514646]
TM7SF3	ENSSSCG00000000553	transmembrane 7 superfamily member 3 [Source:NCBI gene;Acc:100156281]
ITPR2	ENSSSCG00000000555	inositol 1,4,5-trisphosphate receptor type 2 [Source:NCBI gene;Acc:100517279]
SOX5	ENSSSCG00000000567	SRY-box transcription factor 5 [Source:NCBI gene;Acc:100627965]
C2CD5	ENSSSCG00000000570	C2 calcium dependent domain containing 5 [Source:NCBI gene;Acc:100521725]
BCL2L14	ENSSSCG00000000623	BCL2 like 14 [Source:NCBI gene;Acc:100514901]
KLRD1	ENSSSCG00000000642	killer cell lectin like receptor D1 [Source:NCBI gene;Acc:100622915]
CPNE8	ENSSSCG00000000778	copine 8 [Source:NCBI gene;Acc:100519777]
PDZRN4	ENSSSCG00000000791	PDZ domain containing ring finger 4 [Source:NCBI gene;Acc:100156795]
TMEM117	ENSSSCG00000000801	transmembrane protein 117 [Source:NCBI gene;Acc:100524623]
NELL2	ENSSSCG00000000802	neural EGFL like 2 [Source:NCBI gene;Acc:100525817]
ANO6	ENSSSCG00000000804	anoctamin 6 [Source:NCBI gene;Acc:100155593]
GNPTAB	ENSSSCG00000000862	N-acetylglucosamine-1-phosphate transferase subunits alpha and beta [Source:NCBI gene;Acc:100523554]
NEDD1	ENSSSCG00000000890	NEDD1 gamma-tubulin ring complex targeting factor [Source:NCBI gene;Acc:100514234]
	ENSSSCG00000000905	NADH:ubiquinone oxidoreductase subunit A12 [Source:NCBI gene;Acc:100518016]
TMCC3	ENSSSCG00000000906	transmembrane and coiled-coil domain family 3 [Source:NCBI gene;Acc:100518487]
CRADD	ENSSSCG00000000910	suppressor of cytokine signaling 2 [Source:NCBI gene;Acc:100037966]
C12orf50	ENSSSCG00000000924	chromosome 5 C12orf50 homolog [Source:NCBI gene;Acc:100524088]
SLC6A15	ENSSSCG00000000936	solute carrier family 6 member 15 [Source:NCBI gene;Acc:100628231]
PPFIA2	ENSSSCG00000000940	PTPRF interacting protein alpha 2 [Source:NCBI gene;Acc:100512281]
METTL25	ENSSSCG00000000941	methyltransferase like 25 [Source:NCBI gene;Acc:100512658]
EXOC2	ENSSSCG00000000985	exocyst complex component 2 [Source:NCBI gene;Acc:100520314]
RIPK1	ENSSSCG00000001009	receptor interacting serine/threonine kinase 1 [Source:NCBI gene;Acc:100524751]
SERPINB1	ENSSSCG00000001011	serpin family B member 1 [Source:NCBI gene;Acc:100155145]
CDKAL1	ENSSSCG00000001080	CDK5 regulatory subunit associated protein 1 like 1 [Source:NCBI gene;Acc:100512355]
MRS2	ENSSSCG00000001087	magnesium transporter MRS2 [Source:NCBI gene;Acc:100151824]
GPLD1	ENSSSCG00000001089	glycosylphosphatidylinositol specific phospholipase D1 [Source:NCBI gene;Acc:100157497]
RIPOR2	ENSSSCG00000001097	RHO family interacting cell polarization regulator 2 [Source:NCBI gene;Acc:100154661]
CARMIL1	ENSSSCG00000001100	capping protein regulator and myosin 1 linker 1 [Source:NCBI gene;Acc:100157771]
SCGN	ENSSSCG00000001101	secretagogin, EF-hand calcium binding protein [Source:NCBI gene;Acc:768111]
BTN2A2	ENSSSCG00000001131	butyrophilin subfamily 2 member A2 [Source:NCBI gene;Acc:100626604]
	ENSSSCG00000001229	patr class I histocompatibility antigen, A-126 alpha chain-like [Source:NCBI gene;Acc:100513601]
TUBB	ENSSSCG00000001379	tubulin beta class I [Source:NCBI gene;Acc:733686]
DDR1	ENSSSCG00000001382	discoidin domain receptor tyrosine kinase 1 [Source:NCBI gene;Acc:100144462]
	ENSSSCG00000001455	HLA class II histocompatibility antigen, DRB1-4 beta chain-like [Source:NCBI gene;Acc:100153139]
HLA-DOB	ENSSSCG00000001459	MHC class II, DO beta [Source:NCBI gene;Acc:100135049]
COL11A2	ENSSSCG00000001473	collagen type XI alpha 2 chain [Source:NCBI gene;Acc:100520915]
HMGCLL1	ENSSSCG00000001479	3-hydroxymethyl-3-methylglutaryl-CoA lyase like 1 [Source:NCBI gene;Acc:100627473]
HCRTR2	ENSSSCG00000001481	hypocretin receptor 2 [Source:NCBI gene;Acc:397428]
FAM83B	ENSSSCG00000001483	family with sequence similarity 83 member B [Source:NCBI gene;Acc:100155972]
TINAG	ENSSSCG00000001484	tubulointerstitial nephritis antigen [Source:NCBI gene;Acc:100153159]
MLIP	ENSSSCG00000001485	muscular LMNA interacting protein [Source:NCBI gene;Acc:100623023]
KLHL31	ENSSSCG00000001487	kelch like family member 31 [Source:NCBI gene;Acc:100152767]
PRIM2	ENSSSCG00000001493	DNA primase subunit 2 [Source:NCBI gene;Acc:100156829]
DST	ENSSSCG00000001499	dystonin [Source:NCBI gene;Acc:100152205]
COL21A1	ENSSSCG00000001500	collagen type XXI alpha 1 chain [Source:NCBI gene;Acc:100523618]
ARMC12	ENSSSCG00000001550	armadillo repeat containing 12 [Source:NCBI gene;Acc:100157423]
	ENSSSCG00000001551	colipase like 2 [Source:NCBI gene;Acc:102160105]
FGD2	ENSSSCG00000001572	FYVE, RhoGEF and PH domain containing 2 [Source:NCBI gene;Acc:100524814]
PIM1	ENSSSCG00000001573	Pim-1 proto-oncogene, serine/threonine kinase [Source:NCBI gene;Acc:100157844]
MDGA1	ENSSSCG00000001582	MAM domain containing glycosylphosphatidylinositol anchor 1 [Source:NCBI gene;Acc:397529]
DAAM2	ENSSSCG00000001595	dishevelled associated activator of morphogenesis 2 [Source:NCBI gene;Acc:100155713]
MOCS1	ENSSSCG00000001596	molybdenum cofactor synthesis 1 [Source:NCBI gene;Acc:100154835]
LRFN2	ENSSSCG00000001597	leucine rich repeat and fibronectin type III domain containing 2 [Source:NCBI gene;Acc:100153249]
RCAN2	ENSSSCG00000001716	regulator of calcineurin 2 [Source:NCBI gene;Acc:100738282]
CYP39A1	ENSSSCG00000001718	cytochrome P450, family 39, subfamily A, polypeptide 1 [Source:NCBI gene;Acc:100113410]
PTCHD4	ENSSSCG00000001729	patched domain containing 4 [Source:NCBI gene;Acc:100626713]
TFAP2D	ENSSSCG00000001744	transcription factor AP-2 delta [Source:NCBI gene;Acc:100155785]
PKHD1	ENSSSCG00000001746	PKHD1 ciliary IPT domain containing fibrocystin/polyductin [Source:NCBI gene;Acc:100517169]
RASGRF1	ENSSSCG00000001771	Ras protein specific guanine nucleotide releasing factor 1 [Source:NCBI gene;Acc:100157221]
	ENSSSCG00000001776
FAH	ENSSSCG00000001780	fumarylacetoacetate hydrolase [Source:NCBI gene;Acc:100623036]
ADAMTSL3	ENSSSCG00000001793	ADAMTS like 3 [Source:NCBI gene;Acc:100157238]
SV2B	ENSSSCG00000002262	synaptic vesicle glycoprotein 2B [Source:NCBI gene;Acc:100157784]
SLCO3A1	ENSSSCG00000002263	solute carrier organic anion transporter family member 3A1 [Source:NCBI gene;Acc:100156054]
RGMA	ENSSSCG00000002267	repulsive guidance molecule BMP co-receptor a [Source:NCBI gene;Acc:100156429]
PPP1R36	ENSSSCG00000002275	protein phosphatase 1 regulatory subunit 36 [Source:NCBI gene;Acc:100157071]
PLEKHG3	ENSSSCG00000002276	pleckstrin homology and RhoGEF domain containing G3 [Source:NCBI gene;Acc:100155870]
RAB15	ENSSSCG00000002280	RAB15, member RAS oncogene family [Source:NCBI gene;Acc:100512115]
SUSD6	ENSSSCG00000002311	sushi domain containing 6 [Source:NCBI gene;Acc:100155733]
SLC10A1	ENSSSCG00000002313	solute carrier family 10 member 1 [Source:NCBI gene;Acc:100153302]
NPC2	ENSSSCG00000002366	NPC intracellular cholesterol transporter 2 [Source:NCBI gene;Acc:397410]
WDR25	ENSSSCG00000002517	WD repeat domain 25 [Source:NCBI gene;Acc:100513744]
GSTA1	ENSSSCG00000002623	glutathione S-transferase alpha 1 [Source:NCBI gene;Acc:397682]
FBXO31	ENSSSCG00000002654	F-box protein 31 [Source:NCBI gene;Acc:100512607]
ZCCHC14	ENSSSCG00000002656	zinc finger CCHC-type containing 14 [Source:NCBI gene;Acc:100512105]
ZFHX3	ENSSSCG00000002752	zinc finger homeobox 3 [Source:NCBI gene;Acc:100519194]
SMPD3	ENSSSCG00000002764	sphingomyelin phosphodiesterase 3 [Source:NCBI gene;Acc:100518128]
PLEKHF1	ENSSSCG00000002852	pleckstrin homology and FYVE domain containing 1 [Source:NCBI gene;Acc:100522869]
	ENSSSCG00000002968
OSCAR	ENSSSCG00000003259	osteoclast associated Ig-like receptor [Source:NCBI gene;Acc:100518788]
CASZ1	ENSSSCG00000003407	castor zinc finger 1 [Source:NCBI gene;Acc:100510911]
ARHGEF10L	ENSSSCG00000003486	Rho guanine nucleotide exchange factor 10 like [Source:NCBI gene;Acc:100525994]
UBR4	ENSSSCG00000003488	ubiquitin protein ligase E3 component n-recognin 4 [Source:NCBI gene;Acc:102161705]
UBXN10	ENSSSCG00000003498	UBX domain protein 10 [Source:NCBI gene;Acc:100514294]
	ENSSSCG00000003503	von Willebrand factor A domain containing 5B1 [Source:NCBI gene;Acc:100515085]
KIF17	ENSSSCG00000003508	kinesin family member 17 [Source:HGNC Symbol;Acc:HGNC:19167]
SH2D5	ENSSSCG00000003509	SH2 domain containing 5 [Source:NCBI gene;Acc:100515781]
HP1BP3	ENSSSCG00000003511	heterochromatin protein 1 binding protein 3 [Source:NCBI gene;Acc:100625284]
EPHB2	ENSSSCG00000003527	EPH receptor B2 [Source:NCBI gene;Acc:100519549]
SMPDL3B	ENSSSCG00000003582	sphingomyelin phosphodiesterase acid like 3B [Source:NCBI gene;Acc:100514109]
EPB41	ENSSSCG00000003586	erythrocyte membrane protein band 4.1 [Source:NCBI gene;Acc:100515614]
SRSF4	ENSSSCG00000003589	serine and arginine rich splicing factor 4 [Source:NCBI gene;Acc:768101]
PTPRU	ENSSSCG00000003590	protein tyrosine phosphatase receptor type U [Source:NCBI gene;Acc:100515955]
GREB1L	ENSSSCG00000003699	GREB1 like retinoic acid receptor coactivator [Source:NCBI gene;Acc:100524319]
SNRPD1	ENSSSCG00000003701	small nuclear ribonucleoprotein D1 polypeptide [Source:NCBI gene;Acc:100524872]
GATA6	ENSSSCG00000003702	GATA binding protein 6 [Source:NCBI gene;Acc:397600]
	ENSSSCG00000003703
	ENSSSCG00000003704
HRH4	ENSSSCG00000003713	histamine receptor H4 [Source:NCBI gene;Acc:397224]
ZNF521	ENSSSCG00000003715	zinc finger protein 521 [Source:NCBI gene;Acc:100739769]
KLHL14	ENSSSCG00000003733	kelch like family member 14 [Source:NCBI gene;Acc:100518133]
LPAR3	ENSSSCG00000003756	lysophosphatidic acid receptor 3 [Source:NCBI gene;Acc:100113360]
SSX2IP	ENSSSCG00000003757	SSX family member 2 interacting protein [Source:NCBI gene;Acc:100522497]
TTLL7	ENSSSCG00000003760	tubulin tyrosine ligase like 7 [Source:NCBI gene;Acc:100522876]
ADGRL2	ENSSSCG00000003761	adhesion G protein-coupled receptor L2 [Source:NCBI gene;Acc:100524685]
AK5	ENSSSCG00000003773	adenylate kinase 5 [Source:NCBI gene;Acc:733697]
ANKRD13C	ENSSSCG00000003790	ankyrin repeat domain 13C [Source:NCBI gene;Acc:100515670]
WLS	ENSSSCG00000003795	Wnt ligand secretion mediator [Source:NCBI gene;Acc:100516916]
KANK4	ENSSSCG00000003821	KN motif and ankyrin repeat domains 4 [Source:NCBI gene;Acc:100523255]
OMA1	ENSSSCG00000003831	OMA1 zinc metallopeptidase [Source:NCBI gene;Acc:100626843]
DAB1	ENSSSCG00000003833	DAB adaptor protein 1 [Source:NCBI gene;Acc:100037307]
	ENSSSCG00000003839	phospholipid phosphatase 3 [Source:NCBI gene;Acc:100512419]
EPS15	ENSSSCG00000003872	epidermal growth factor receptor pathway substrate 15 [Source:NCBI gene;Acc:100518076]
TTC39A	ENSSSCG00000003875	tetratricopeptide repeat domain 39A [Source:NCBI gene;Acc:100518433]
FAF1	ENSSSCG00000003877	Fas associated factor 1 [Source:NCBI gene;Acc:100518974]
CYP4A24	ENSSSCG00000003891	cytochrome P450 4A24 [Source:NCBI gene;Acc:403326]
MAST2	ENSSSCG00000003913	microtubule associated serine/threonine kinase 2 [Source:NCBI gene;Acc:100512112]
ZSWIM5	ENSSSCG00000003921	zinc finger SWIM-type containing 5 [Source:NCBI gene;Acc:100514968]
HYI	ENSSSCG00000003940	hydroxypyruvate isomerase (putative) [Source:NCBI gene;Acc:100517478]
TIE1	ENSSSCG00000003950	tyrosine kinase with immunoglobulin like and EGF like domains 1 [Source:NCBI gene;Acc:494022]
	ENSSSCG00000003960
SMOC2	ENSSSCG00000004013	SPARC related modular calcium binding 2 [Source:NCBI gene;Acc:100737228]
TMEM242	ENSSSCG00000004063	transmembrane protein 242 [Source:NCBI gene;Acc:100152509]
ARID1B	ENSSSCG00000004064	AT-rich interaction domain 1B [Source:NCBI gene;Acc:100152904]
IYD	ENSSSCG00000004093	iodotyrosine deiodinase [Source:NCBI gene;Acc:403124]
PPP1R14C	ENSSSCG00000004094	protein phosphatase 1 regulatory inhibitor subunit 14C [Source:NCBI gene;Acc:100521302]
TAB2	ENSSSCG00000004110	TGF-beta activated kinase 1 (MAP3K7) binding protein 2 [Source:NCBI gene;Acc:100156182]
STXBP5	ENSSSCG00000004113	syntaxin binding protein 5 [Source:NCBI gene;Acc:100152912]
UTRN	ENSSSCG00000004123	utrophin [Source:NCBI gene;Acc:100523292]
PDE7B	ENSSSCG00000004165	phosphodiesterase 7B [Source:NCBI gene;Acc:100037969]
AHI1	ENSSSCG00000004166	Abelson helper integration site 1 [Source:NCBI gene;Acc:100514806]
SLC2A12	ENSSSCG00000004172	solute carrier family 2 member 12 [Source:NCBI gene;Acc:100517381]
RPS12	ENSSSCG00000004177	ribosomal protein S12 [Source:NCBI gene;Acc:397650]
ARHGAP18	ENSSSCG00000004205	Rho GTPase activating protein 18 [Source:NCBI gene;Acc:100525547]
PTPRK	ENSSSCG00000004209	protein tyrosine phosphatase receptor type K [Source:NCBI gene;Acc:100153609]
	ENSSSCG00000004212	protein LEG1 homolog [Source:NCBI gene;Acc:100511607]
KIAA0408	ENSSSCG00000004215	KIAA0408 ortholog [Source:NCBI gene;Acc:110255188]
ECHDC1	ENSSSCG00000004216	ethylmalonyl-CoA decarboxylase 1 [Source:NCBI gene;Acc:100512509]
SMPDL3A	ENSSSCG00000004233	sphingomyelin phosphodiesterase acid like 3A [Source:NCBI gene;Acc:100153442]
HSF2	ENSSSCG00000004238	heat shock transcription factor 2 [Source:NCBI gene;Acc:100154234]
TBC1D32	ENSSSCG00000004242	TBC1 domain family member 32 [Source:NCBI gene;Acc:100156680]
	ENSSSCG00000004243
CEP85L	ENSSSCG00000004249	centrosomal protein 85 like [Source:NCBI gene;Acc:100522409]
SLC35F1	ENSSSCG00000004250	solute carrier family 35 member F1 [Source:NCBI gene;Acc:100522582]
	ENSSSCG00000004252	nephrocan-like [Source:NCBI gene;Acc:100520342]
	ENSSSCG00000004253	golgi associated PDZ and coiled-coil motif containing [Source:NCBI gene;Acc:100520524]
DCBLD1	ENSSSCG00000004254	discoidin, CUB and LCCL domain containing 1 [Source:NCBI gene;Acc:100156679]
VGLL2	ENSSSCG00000004255	vestigial like family member 2 [Source:NCBI gene;Acc:100739384]
ADGRB3	ENSSSCG00000004270	adhesion G protein-coupled receptor B3 [Source:NCBI gene;Acc:100736796]
LMBRD1	ENSSSCG00000004272	LMBR1 domain containing 1 [Source:NCBI gene;Acc:100153685]
COL9A1	ENSSSCG00000004274	collagen type IX alpha 1 chain [Source:NCBI gene;Acc:100155319]
FAM135A	ENSSSCG00000004275	family with sequence similarity 135 member A [Source:NCBI gene;Acc:100513127]
SMAP1	ENSSSCG00000004276	small ArfGAP 1 [Source:NCBI gene;Acc:100513326]
OGFRL1	ENSSSCG00000004279	opioid growth factor receptor like 1 [Source:NCBI gene;Acc:100153138]
RIMS1	ENSSSCG00000004280	regulating synaptic membrane exocytosis 1 [Source:NCBI gene;Acc:100157596]
RNGTT	ENSSSCG00000004311	RNA guanylyltransferase and 5'-phosphatase [Source:NCBI gene;Acc:100520874]
ATG5	ENSSSCG00000004370	autophagy related 5 [Source:NCBI gene;Acc:100739102]
CDC40	ENSSSCG00000004403	cell division cycle 40 [Source:NCBI gene;Acc:100511111]
CCN6	ENSSSCG00000004422	cellular communication network factor 6 [Source:NCBI gene;Acc:100155801]
HS3ST5	ENSSSCG00000004433	heparan sulfate-glucosamine 3-sulfotransferase 5 [Source:NCBI gene;Acc:100155403]
FRK	ENSSSCG00000004434	fyn related Src family tyrosine kinase [Source:NCBI gene;Acc:100157810]
TENT5A	ENSSSCG00000004464	terminal nucleotidyltransferase 5A [Source:NCBI gene;Acc:100156873]
HTR1B	ENSSSCG00000004475	5-hydroxytryptamine receptor 1B [Source:NCBI gene;Acc:397563]
CD109	ENSSSCG00000004485	CD109 molecule [Source:NCBI gene;Acc:100155478]
SLC17A5	ENSSSCG00000004486	solute carrier family 17 member 5 [Source:NCBI gene;Acc:100516051]
SETBP1	ENSSSCG00000004490	SET binding protein 1 [Source:NCBI gene;Acc:100153027]
DYM	ENSSSCG00000004508	dymeclin [Source:NCBI gene;Acc:100738627]
MAPK4	ENSSSCG00000004520	mitogen-activated protein kinase 4 [Source:NCBI gene;Acc:100523414]
MRO	ENSSSCG00000004521	maestro [Source:NCBI gene;Acc:100156956]
CCDC68	ENSSSCG00000004534	coiled-coil domain containing 68 [Source:NCBI gene;Acc:100152360]
FAM81A	ENSSSCG00000004586	family with sequence similarity 81 member A [Source:NCBI gene;Acc:100156658]
AQP9	ENSSSCG00000004597	aquaporin 9 [Source:NCBI gene;Acc:100127153]
TCF12	ENSSSCG00000004600	transcription factor 12 [Source:NCBI gene;Acc:100621557]
RFX7	ENSSSCG00000004603	regulatory factor X7 [Source:NCBI gene;Acc:100152054]
WDR72	ENSSSCG00000004615	WD repeat domain 72 [Source:NCBI gene;Acc:100153251]
EIF3J	ENSSSCG00000004691	eukaryotic translation initiation factor 3 subunit J [Source:NCBI gene;Acc:100517070]
TGM5	ENSSSCG00000004713	transglutaminase 5 [Source:NCBI gene;Acc:100158178]
TMEM62	ENSSSCG00000004716	transmembrane protein 62 [Source:NCBI gene;Acc:100624103]
EXD1	ENSSSCG00000004752	exonuclease 3'-5' domain containing 1 [Source:NCBI gene;Acc:100516945]
INO80	ENSSSCG00000004753	INO80 complex ATPase subunit [Source:NCBI gene;Acc:100517567]
GPR176	ENSSSCG00000004787	G protein-coupled receptor 176 [Source:NCBI gene;Acc:100153995]
CACHD1	ENSSSCG00000004829	cache domain containing 1 [Source:NCBI gene;Acc:100522413]
ZNF516	ENSSSCG00000004859	zinc finger protein 516 [Source:NCBI gene;Acc:106504155]
CDH7	ENSSSCG00000004886	cadherin 7 [Source:NCBI gene;Acc:100156376]
ITGA11	ENSSSCG00000004961	integrin subunit alpha 11 [Source:NCBI gene;Acc:100520350]
NTRK3	ENSSSCG00000005106	neurotrophic receptor tyrosine kinase 3 [Source:NCBI gene;Acc:397511]
TEK	ENSSSCG00000005122	TEK receptor tyrosine kinase [Source:NCBI gene;Acc:396729]
SH3GL2	ENSSSCG00000005177	SH3 domain containing GRB2 like 2, endophilin A1 [Source:NCBI gene;Acc:100155580]
CNTLN	ENSSSCG00000005178	centlein [Source:NCBI gene;Acc:100154767]
BNC2	ENSSSCG00000005180	basonuclin 2 [Source:NCBI gene;Acc:100513064]
CCDC171	ENSSSCG00000005182	coiled-coil domain containing 171 [Source:NCBI gene;Acc:100514146]
TYRP1	ENSSSCG00000005193	tyrosinase related protein 1 [Source:NCBI gene;Acc:574065]
SLC1A1	ENSSSCG00000005222	solute carrier family 1 member 1 [Source:NCBI gene;Acc:397003]
VLDLR	ENSSSCG00000005229	very low density lipoprotein receptor [Source:NCBI gene;Acc:733630]
SMARCA2	ENSSSCG00000005232	SWI/SNF related, matrix associated, actin dependent regulator of chromatin, subfamily a, member 2 [Source:NCBI gene;Acc:100157302]
PTAR1	ENSSSCG00000005252	protein prenyltransferase alpha subunit repeat containing 1 [Source:NCBI gene;Acc:100153489]
ANXA1	ENSSSCG00000005267	annexin A1 [Source:NCBI gene;Acc:396942]
RORB	ENSSSCG00000005268	RAR related orphan receptor B [Source:NCBI gene;Acc:100739111]
TRPM6	ENSSSCG00000005269	transient receptor potential cation channel subfamily M member 6 [Source:NCBI gene;Acc:100157775]
	ENSSSCG00000005430
ELP1	ENSSSCG00000005441	elongator complex protein 1 [Source:NCBI gene;Acc:100157586]
ASTN2	ENSSSCG00000005502	astrotactin 2 [Source:NCBI gene;Acc:100523883]
BRINP1	ENSSSCG00000005504	BMP/retinoic acid inducible neural specific 1 [Source:NCBI gene;Acc:100625235]
	ENSSSCG00000005518	glycoprotein alpha-galactosyltransferase 1, pseudogene [Source:NCBI gene;Acc:396733]
DAB2IP	ENSSSCG00000005524	DAB2 interacting protein [Source:NCBI gene;Acc:100628179]
DENND1A	ENSSSCG00000005585	DENN domain containing 1A [Source:NCBI gene;Acc:102166001]
GOLGA1	ENSSSCG00000005597	golgin A1 [Source:NCBI gene;Acc:100515524]
SCAI	ENSSSCG00000005598	suppressor of cancer cell invasion [Source:NCBI gene;Acc:100515704]
PPP6C	ENSSSCG00000005600	protein phosphatase 6 catalytic subunit [Source:NCBI gene;Acc:100153256]
GAPVD1	ENSSSCG00000005602	GTPase activating protein and VPS9 domains 1 [Source:NCBI gene;Acc:106504138]
RALGPS1	ENSSSCG00000005607	Ral GEF with PH domain and SH3 binding motif 1 [Source:NCBI gene;Acc:100157921]
NIBAN2	ENSSSCG00000005614	niban apoptosis regulator 2 [Source:NCBI gene;Acc:100739641]
STXBP1	ENSSSCG00000005617	syntaxin binding protein 1 [Source:NCBI gene;Acc:100517927]
IER5L	ENSSSCG00000005673	immediate early response 5 like [Source:NCBI gene;Acc:102161937]
	ENSSSCG00000005738	ral guanine nucleotide dissociation stimulator [Source:NCBI gene;Acc:100513970]
OPLAH	ENSSSCG00000005911	5-oxoprolinase, ATP-hydrolysing [Source:NCBI gene;Acc:100515137]
EXOSC4	ENSSSCG00000005925	exosome component 4 [Source:NCBI gene;Acc:100511875]
FAM135B	ENSSSCG00000005939	family with sequence similarity 135 member B [Source:NCBI gene;Acc:100155271]
KHDRBS3	ENSSSCG00000005941	KH RNA binding domain containing, signal transduction associated 3 [Source:NCBI gene;Acc:100155706]
ST3GAL1	ENSSSCG00000005943	ST3 beta-galactoside alpha-2,3-sialyltransferase 1 [Source:NCBI gene;Acc:445537]
NDRG1	ENSSSCG00000005944	N-myc downstream regulated 1 [Source:NCBI gene;Acc:100156071]
	ENSSSCG00000005959	CYFIP related Rac1 interactor B [Source:NCBI gene;Acc:100157574]
	ENSSSCG00000005961	gasdermin-A-like [Source:NCBI gene;Acc:102165484]
	ENSSSCG00000005962	gasdermin-C [Source:NCBI gene;Acc:100151870]
LRATD2	ENSSSCG00000005967	LRAT domain containing 2 [Source:NCBI gene;Acc:100623936]
SHAS2	ENSSSCG00000005992	hyaluronan synthase 2 [Source:NCBI gene;Acc:397120]
MTBP	ENSSSCG00000005995	MDM2 binding protein [Source:NCBI gene;Acc:100152418]
COL14A1	ENSSSCG00000005997	collagen type XIV alpha 1 chain [Source:NCBI gene;Acc:100158059]
ZFPM2	ENSSSCG00000006038	zinc finger protein, FOG family member 2 [Source:NCBI gene;Acc:100337657]
DCAF13	ENSSSCG00000006048	DDB1 and CUL4 associated factor 13 [Source:NCBI gene;Acc:100155764]
ATP6V1C1	ENSSSCG00000006054	ATPase H+ transporting V1 subunit C1 [Source:NCBI gene;Acc:100154942]
ODF1	ENSSSCG00000006056	outer dense fiber of sperm tails 1 [Source:NCBI gene;Acc:397489]
GRHL2	ENSSSCG00000006060	grainyhead like transcription factor 2 [Source:NCBI gene;Acc:100525287]
	ENSSSCG00000006061	zinc finger protein 706 [Source:NCBI gene;Acc:100521722]
ANKRD46	ENSSSCG00000006065	ankyrin repeat domain 46 [Source:NCBI gene;Acc:100152758]
STK3	ENSSSCG00000006074	serine/threonine kinase 3 [Source:NCBI gene;Acc:100524741]
ESRP1	ENSSSCG00000006099	epithelial splicing regulatory protein 1 [Source:NCBI gene;Acc:100512961]
RAD54B	ENSSSCG00000006101	RAD54 homolog B [Source:NCBI gene;Acc:100513148]
PDP1	ENSSSCG00000006107	pyruvate dehyrogenase phosphatase catalytic subunit 1 [Source:NCBI gene;Acc:100153002]
RBM12B	ENSSSCG00000006110	RNA binding motif protein 12B [Source:NCBI gene;Acc:100514101]
CALB1	ENSSSCG00000006125	calbindin 1 [Source:NCBI gene;Acc:100153645]
CNGB3	ENSSSCG00000006134	cyclic nucleotide gated channel subunit beta 3 [Source:NCBI gene;Acc:100523666]
ATP6V0D2	ENSSSCG00000006138	ATPase H+ transporting V0 subunit d2 [Source:NCBI gene;Acc:100521494]
CA13	ENSSSCG00000006143	carbonic anhydrase 13 [Source:NCBI gene;Acc:100152714]
E2F5	ENSSSCG00000006145	E2F transcription factor 5 [Source:NCBI gene;Acc:100157957]
LRRCC1	ENSSSCG00000006146	leucine rich repeat and coiled-coil centrosomal protein 1 [Source:NCBI gene;Acc:100152599]
	ENSSSCG00000006147	solute carrier family 7 member 13-like [Source:NCBI gene;Acc:100156775]
	ENSSSCG00000006148	solute carrier family 7 member 13-like [Source:NCBI gene;Acc:100522735]
ZBTB10	ENSSSCG00000006155	zinc finger and BTB domain containing 10 [Source:NCBI gene;Acc:100151888]
UBE2W	ENSSSCG00000006177	ubiquitin conjugating enzyme E2 W [Source:NCBI gene;Acc:100152196]
STAU2	ENSSSCG00000006179	staufen double-stranded RNA binding protein 2 [Source:NCBI gene;Acc:100516319]
SBSPON	ENSSSCG00000006183	somatomedin B and thrombospondin type 1 domain containing [Source:NCBI gene;Acc:100517890]
PRDM14	ENSSSCG00000006195	PR/SET domain 14 [Source:NCBI gene;Acc:100519142]
SLCO5A1	ENSSSCG00000006196	solute carrier organic anion transporter family member 5A1 [Source:NCBI gene;Acc:100157250]
SULF1	ENSSSCG00000006197	sulfatase 1 [Source:NCBI gene;Acc:100152427]
CLVS1	ENSSSCG00000006230	clavesin 1 [Source:NCBI gene;Acc:100151841]
CA8	ENSSSCG00000006233	carbonic anhydrase 8 [Source:NCBI gene;Acc:100157869]
PENK	ENSSSCG00000006243	proenkephalin [Source:NCBI gene;Acc:100152093]
SDR16C5	ENSSSCG00000006245	short chain dehydrogenase/reductase family 16C, member 5 [Source:NCBI gene;Acc:100157319]
PLAG1	ENSSSCG00000006247	PLAG1 zinc finger [Source:NCBI gene;Acc:100154905]
MOS	ENSSSCG00000006248	MOS proto-oncogene, serine/threonine kinase [Source:NCBI gene;Acc:100127484]
ST18	ENSSSCG00000006266	ST18 C2H2C-type zinc finger transcription factor [Source:NCBI gene;Acc:100154114]
PRKDC	ENSSSCG00000006274	protein kinase, DNA-activated, catalytic subunit [Source:NCBI gene;Acc:100156379]
FAM78B	ENSSSCG00000006321	family with sequence similarity 78 member B [Source:NCBI gene;Acc:100153010]
ATF6	ENSSSCG00000006346	activating transcription factor 6 [Source:NCBI gene;Acc:100158076]
KIRREL1	ENSSSCG00000006453	kirre like nephrin family adhesion molecule 1 [Source:NCBI gene;Acc:100512834]
PMVK	ENSSSCG00000006535	phosphomevalonate kinase [Source:NCBI gene;Acc:100152301]
KCNN3	ENSSSCG00000006542	potassium calcium-activated channel subfamily N member 3 [Source:NCBI gene;Acc:397045]
	ENSSSCG00000006592	S100 calcium binding protein A7 [Source:NCBI gene;Acc:100144623]
IVL	ENSSSCG00000006595	involucrin [Source:NCBI gene;Acc:407242]
MAB21L3	ENSSSCG00000006742	mab-21 like 3 [Source:NCBI gene;Acc:100154970]
SLC22A15	ENSSSCG00000006743	solute carrier family 22 member 15 [Source:NCBI gene;Acc:110255201]
RAP1A	ENSSSCG00000006785	RAP1A, member of RAS oncogene family [Source:NCBI gene;Acc:100153199]
	ENSSSCG00000006792	pepsinogen B [Source:NCBI gene;Acc:100620249]
	ENSSSCG00000006793
CHI3L2	ENSSSCG00000006796	chitinase 3 like 2 [Source:NCBI gene;Acc:100037944]
	ENSSSCG00000006842
NTNG1	ENSSSCG00000006852	netrin G1 [Source:NCBI gene;Acc:100152257]
PLPPR4	ENSSSCG00000006875	phospholipid phosphatase related 4 [Source:NCBI gene;Acc:100158146]
DPYD	ENSSSCG00000006878	dihydropyrimidine dehydrogenase [Source:NCBI gene;Acc:397109]
PTBP2	ENSSSCG00000006879	polypyrimidine tract binding protein 2 [Source:NCBI gene;Acc:100515203]
	ENSSSCG00000006881
ALG14	ENSSSCG00000006885	ALG14 UDP-N-acetylglucosaminyltransferase subunit [Source:NCBI gene;Acc:100157203]
ABCA4	ENSSSCG00000006890	ATP binding cassette subfamily A member 4 [Source:NCBI gene;Acc:100155583]
TGFBR3	ENSSSCG00000006911	transforming growth factor beta receptor 3 [Source:NCBI gene;Acc:397512]
HFM1	ENSSSCG00000006912	helicase for meiosis 1 [Source:NCBI gene;Acc:100156806]
GBP2	ENSSSCG00000006923	guanylate binding protein 2, interferon-inducible [Source:NCBI gene;Acc:100153137]
PKN2	ENSSSCG00000006927	protein kinase N2 [Source:NCBI gene;Acc:100154766]
	ENSSSCG00000006928	LIM domain only 4 [Source:NCBI gene;Acc:100127155]
MSR1	ENSSSCG00000006979	macrophage scavenger receptor 1 [Source:NCBI gene;Acc:100511665]
ZDHHC2	ENSSSCG00000006982	zinc finger DHHC-type palmitoyltransferase 2 [Source:NCBI gene;Acc:100516118]
	ENSSSCG00000006996	FSHD region gene 1 [Source:NCBI gene;Acc:100515105]
ZMAT4	ENSSSCG00000007010	zinc finger matrin-type 4 [Source:NCBI gene;Acc:100521589]
ANK1	ENSSSCG00000007022	ankyrin 1 [Source:NCBI gene;Acc:100157679]
BANF2	ENSSSCG00000007087	BANF family member 2 [Source:NCBI gene;Acc:100521936]
	ENSSSCG00000007088	sorting nexin 5 [Source:NCBI gene;Acc:100155390]
MGME1	ENSSSCG00000007089	mitochondrial genome maintenance exonuclease 1 [Source:NCBI gene;Acc:100738618]
PAX1	ENSSSCG00000007112	paired box 1 [Source:NCBI gene;Acc:100739820]
FOXA2	ENSSSCG00000007114	forkhead box A2 [Source:NCBI gene;Acc:100513828]
CD93	ENSSSCG00000007116	CD93 molecule [Source:NCBI gene;Acc:100155660]
SYNDIG1	ENSSSCG00000007130	synapse differentiation inducing 1 [Source:NCBI gene;Acc:100620296]
ACSS1	ENSSSCG00000007133	acyl-CoA synthetase short chain family member 1 [Source:NCBI gene;Acc:100154828]
VPS16	ENSSSCG00000007167	VPS16 core subunit of CORVET and HOPS complexes [Source:NCBI gene;Acc:100511290]
PCED1A	ENSSSCG00000007168	PC-esterase domain containing 1A [Source:NCBI gene;Acc:100511604]
TMEM239	ENSSSCG00000007169	transmembrane protein 239 [Source:HGNC Symbol;Acc:HGNC:40044]
EBF4	ENSSSCG00000007171	EBF family member 4 [Source:NCBI gene;Acc:100523648]
IDH3B	ENSSSCG00000007173	isocitrate dehydrogenase (NAD(+)) 3 non-catalytic subunit beta [Source:NCBI gene;Acc:733641]
STK35	ENSSSCG00000007179	serine/threonine kinase 35 [Source:NCBI gene;Acc:100524534]
SLC52A3	ENSSSCG00000007199	solute carrier family 52 member 3 [Source:NCBI gene;Acc:100516303]
SRSF6	ENSSSCG00000007362	serine and arginine rich splicing factor 6 [Source:NCBI gene;Acc:768102]
ZNF217	ENSSSCG00000007484	zinc finger protein 217 [Source:NCBI gene;Acc:100141410]
BCAS1	ENSSSCG00000007485	breast carcinoma amplified sequence 1 [Source:NCBI gene;Acc:100126238]
CYP24A1	ENSSSCG00000007486	cytochrome P450, family 24, subfamily A, polypeptide 1 [Source:NCBI gene;Acc:397145]
PFDN4	ENSSSCG00000007487	prefoldin subunit 4 [Source:NCBI gene;Acc:100144532]
DOK5	ENSSSCG00000007488	docking protein 5 [Source:NCBI gene;Acc:100144540]
CBLN4	ENSSSCG00000007490	cerebellin 4 precursor [Source:NCBI gene;Acc:100141408]
TFAP2C	ENSSSCG00000007499	transcription factor AP-2 gamma [Source:NCBI gene;Acc:100144525]
	ENSSSCG00000007500
BMP7	ENSSSCG00000007501	bone morphogenetic protein 7 [Source:NCBI gene;Acc:492315]
RBM38	ENSSSCG00000007504	RNA binding motif protein 38 [Source:NCBI gene;Acc:100125973]
CTCFL	ENSSSCG00000007505	CCCTC-binding factor like [Source:NCBI gene;Acc:100126237]
C20orf85	ENSSSCG00000007510	chromosome 17 C20orf85 homolog [Source:NCBI gene;Acc:100144513]
APCDD1L	ENSSSCG00000007515	APC down-regulated 1 like [Source:NCBI gene;Acc:100151808]
	ENSSSCG00000007516	syntaxin 16 [Source:NCBI gene;Acc:100144526]
NPEPL1	ENSSSCG00000007517	aminopeptidase like 1 [Source:NCBI gene;Acc:100144530]
PHACTR3	ENSSSCG00000007528	phosphatase and actin regulator 3 [Source:NCBI gene;Acc:100126239]
FAM217B	ENSSSCG00000007531	family with sequence similarity 217 member B [Source:NCBI gene;Acc:102162416]
PDGFA	ENSSSCG00000007541	platelet derived growth factor subunit A [Source:NCBI gene;Acc:100519764]
PRKAR1B	ENSSSCG00000007542	protein kinase cAMP-dependent type I regulatory subunit beta [Source:NCBI gene;Acc:100522128]
PSMG3	ENSSSCG00000007556	proteasome assembly chaperone 3 [Source:NCBI gene;Acc:100521490]
MICALL2	ENSSSCG00000007557	MICAL like 2 [Source:NCBI gene;Acc:100523596]
TMEM184A	ENSSSCG00000007560	transmembrane protein 184A [Source:NCBI gene;Acc:100523956]
SDK1	ENSSSCG00000007574	sidekick cell adhesion molecule 1 [Source:NCBI gene;Acc:100512953]
BAIAP2L1	ENSSSCG00000007602	BAR/IMD domain containing adaptor protein 2 like 1 [Source:NCBI gene;Acc:100521439]
NPTX2	ENSSSCG00000007603	neuronal pentraxin 2 [Source:NCBI gene;Acc:100521613]
CUX1	ENSSSCG00000007681	cut like homeobox 1 [Source:NCBI gene;Acc:100521258]
TMC5	ENSSSCG00000007868	transmembrane channel like 5 [Source:NCBI gene;Acc:100623809]
XYLT1	ENSSSCG00000007872	xylosyltransferase 1 [Source:NCBI gene;Acc:100514160]
TMEM114	ENSSSCG00000007915	transmembrane protein 114 [Source:NCBI gene;Acc:100523362]
	ENSSSCG00000008097	tubulin tyrosine ligase [Source:NCBI gene;Acc:445530]
MERTK	ENSSSCG00000008103	MER proto-oncogene, tyrosine kinase [Source:NCBI gene;Acc:100519652]
ANAPC1	ENSSSCG00000008105	anaphase promoting complex subunit 1 [Source:NCBI gene;Acc:100519830]
	ENSSSCG00000008106
FAM178B	ENSSSCG00000008196	family with sequence similarity 178 member B [Source:HGNC Symbol;Acc:HGNC:28036]
CD8B	ENSSSCG00000008213	CD8b molecule [Source:NCBI gene;Acc:396636]
CD8A	ENSSSCG00000008217	CD8a molecule [Source:NCBI gene;Acc:396627]
	ENSSSCG00000008240	SH2 domain containing 6 [Source:NCBI gene;Acc:100520186]
CYP26B1	ENSSSCG00000008311	cytochrome P450 26B1 [Source:NCBI gene;Acc:100521659]
DYSF	ENSSSCG00000008312	dysferlin [Source:NCBI gene;Acc:100522732]
GFPT1	ENSSSCG00000008339	glutamine--fructose-6-phosphate transaminase 1 [Source:NCBI gene;Acc:397209]
ASB3	ENSSSCG00000008415	ankyrin repeat and SOCS box containing 3 [Source:NCBI gene;Acc:100518009]
CAMKMT	ENSSSCG00000008447	calmodulin-lysine N-methyltransferase [Source:NCBI gene;Acc:100737360]
COX7A2L	ENSSSCG00000008466	cytochrome c oxidase subunit 7A-related protein, mitochondrial [Source:NCBI gene;Acc:100516606]
ADCY3	ENSSSCG00000008578	adenylate cyclase 3 [Source:NCBI gene;Acc:100514402]
NCOA1	ENSSSCG00000008581	nuclear receptor coactivator 1 [Source:NCBI gene;Acc:574068]
ATAD2B	ENSSSCG00000008591	ATPase family AAA domain containing 2B [Source:NCBI gene;Acc:100518905]
KLHL29	ENSSSCG00000008593	kelch like family member 29 [Source:NCBI gene;Acc:100522799]
RNF4	ENSSSCG00000008690	ring finger protein 4 [Source:NCBI gene;Acc:692189]
LRPAP1	ENSSSCG00000008701	LDL receptor related protein associated protein 1 [Source:NCBI gene;Acc:399654]
HTRA3	ENSSSCG00000008723	HtrA serine peptidase 3 [Source:NCBI gene;Acc:100337673]
ACOX3	ENSSSCG00000008724	acyl-CoA oxidase 3, pristanoyl [Source:NCBI gene;Acc:100523005]
STIM2	ENSSSCG00000008762	stromal interaction molecule 2 [Source:NCBI gene;Acc:100519497]
PCDH7	ENSSSCG00000008765	protocadherin 7 [Source:NCBI gene;Acc:100520035]
ARAP2	ENSSSCG00000008768	ArfGAP with RhoGAP domain, ankyrin repeat and PH domain 2 [Source:NCBI gene;Acc:100521564]
	ENSSSCG00000008769	macrosialin [Source:NCBI gene;Acc:100520753]
NWD2	ENSSSCG00000008770	NACHT and WD repeat domain containing 2 [Source:NCBI gene;Acc:100522449]
C4orf19	ENSSSCG00000008771	chromosome 8 C4orf19 homolog [Source:NCBI gene;Acc:100738623]
PGM2	ENSSSCG00000008773	phosphoglucomutase 2 [Source:NCBI gene;Acc:100522261]
FAM114A1	ENSSSCG00000008785	family with sequence similarity 114 member A1 [Source:NCBI gene;Acc:100525173]
KLHL5	ENSSSCG00000008787	kelch like family member 5 [Source:NCBI gene;Acc:100739193]
RHOH	ENSSSCG00000008794	ras homolog family member H [Source:NCBI gene;Acc:100513215]
KIT	ENSSSCG00000008842	KIT proto-oncogene, receptor tyrosine kinase [Source:NCBI gene;Acc:396810]
KDR	ENSSSCG00000008844	kinase insert domain receptor [Source:NCBI gene;Acc:397311]
	ENSSSCG00000008984
SOWAHB	ENSSSCG00000008985	sosondowah ankyrin repeat domain family member B [Source:NCBI gene;Acc:100523320]
FRAS1	ENSSSCG00000008991	Fraser extracellular matrix complex subunit 1 [Source:NCBI gene;Acc:100514970]
NPY2R	ENSSSCG00000008993	neuropeptide Y receptor Y2 [Source:NCBI gene;Acc:397291]
RBM46	ENSSSCG00000008994	RNA binding motif protein 46 [Source:NCBI gene;Acc:100513804]
SFRP2	ENSSSCG00000009004	secreted frizzled related protein 2 [Source:NCBI gene;Acc:100516027]
RNF150	ENSSSCG00000009053	ring finger protein 150 [Source:NCBI gene;Acc:100624789]
MAML3	ENSSSCG00000009060	mastermind like transcriptional coactivator 3 [Source:NCBI gene;Acc:100626233]
PRDM5	ENSSSCG00000009101	PR/SET domain 5 [Source:NCBI gene;Acc:100522885]
	ENSSSCG00000009102
PPP3CA	ENSSSCG00000009172	protein phosphatase 3 catalytic subunit alpha [Source:NCBI gene;Acc:397241]
C4orf17	ENSSSCG00000009181	chromosome 8 C4orf17 homolog [Source:NCBI gene;Acc:102162335]
	ENSSSCG00000009182	alcohol dehydrogenase 1C (class I), gamma polypeptide [Source:NCBI gene;Acc:100512615]
KLHL8	ENSSSCG00000009226	kelch like family member 8 [Source:NCBI gene;Acc:100521566]
MAPK10	ENSSSCG00000009228	mitogen-activated protein kinase 10 [Source:NCBI gene;Acc:100521736]
ARHGAP24	ENSSSCG00000009229	Rho GTPase activating protein 24 [Source:NCBI gene;Acc:100522450]
WDFY3	ENSSSCG00000009230	WD repeat and FYVE domain containing 3 [Source:NCBI gene;Acc:100523387]
CDS1	ENSSSCG00000009231	CDP-diacylglycerol synthase 1 [Source:NCBI gene;Acc:733582]
NKX6-1	ENSSSCG00000009232	NK6 homeobox 1 [Source:NCBI gene;Acc:397289]
GPAT3	ENSSSCG00000009233	glycerol-3-phosphate acyltransferase 3 [Source:NCBI gene;Acc:100524266]
SCD5	ENSSSCG00000009245	stearoyl-CoA desaturase 5 [Source:NCBI gene;Acc:100135661]
ENOPH1	ENSSSCG00000009246	enolase-phosphatase 1 [Source:NCBI gene;Acc:100511394]
HNRNPD	ENSSSCG00000009249	heterogeneous nuclear ribonucleoprotein D [Source:NCBI gene;Acc:100512244]
PRKG2	ENSSSCG00000009250	protein kinase cGMP-dependent 2 [Source:NCBI gene;Acc:100512796]
CCDC70	ENSSSCG00000009383	coiled-coil domain containing 70 [Source:NCBI gene;Acc:100514363]
	ENSSSCG00000009425	laccase domain containing 1 [Source:NCBI gene;Acc:100153856]
FAM216B	ENSSSCG00000009428	family with sequence similarity 216 member B [Source:NCBI gene;Acc:100157364]
TNFSF11	ENSSSCG00000009429	TNF superfamily member 11 [Source:NCBI gene;Acc:100037976]
AKAP11	ENSSSCG00000009430	A-kinase anchoring protein 11 [Source:NCBI gene;Acc:100736642]
DGKH	ENSSSCG00000009431	diacylglycerol kinase eta [Source:NCBI gene;Acc:100157742]
RGCC	ENSSSCG00000009434	regulator of cell cycle [Source:NCBI gene;Acc:100625944]
NAA16	ENSSSCG00000009435	N-alpha-acetyltransferase 16, NatA auxiliary subunit [Source:NCBI gene;Acc:100158125]
MBNL2	ENSSSCG00000009505	muscleblind like splicing regulator 2 [Source:NCBI gene;Acc:100519915]
	ENSSSCG00000009543	myosin XVI [Source:NCBI gene;Acc:102161679]
TUBGCP3	ENSSSCG00000009553	tubulin gamma complex associated protein 3 [Source:NCBI gene;Acc:100155453]
SEMA4D	ENSSSCG00000009584	semaphorin 4D [Source:NCBI gene;Acc:100152598]
SYK	ENSSSCG00000009589	spleen associated tyrosine kinase [Source:NCBI gene;Acc:100125540]
GFRA2	ENSSSCG00000009605	GDNF family receptor alpha 2 [Source:NCBI gene;Acc:102166950]
HR	ENSSSCG00000009616	HR lysine demethylase and nuclear receptor corepressor [Source:NCBI gene;Acc:397617]
POLR3D	ENSSSCG00000009622	RNA polymerase III subunit D [Source:NCBI gene;Acc:100154035]
PEBP4	ENSSSCG00000009631	phosphatidylethanolamine binding protein 4 [Source:NCBI gene;Acc:100302365]
	ENSSSCG00000009638	Rho related BTB domain containing 2 [Source:NCBI gene;Acc:100152436]
DOCK5	ENSSSCG00000009650	dedicator of cytokinesis 5 [Source:NCBI gene;Acc:100510985]
	ENSSSCG00000009672	scavenger receptor class A member 5 [Source:NCBI gene;Acc:100524281]
NUGGC	ENSSSCG00000009673	nuclear GTPase, germinal center associated [Source:NCBI gene;Acc:100157947]
ELP3	ENSSSCG00000009674	elongator acetyltransferase complex subunit 3 [Source:NCBI gene;Acc:102167101]
HMBOX1	ENSSSCG00000009682	homeobox containing 1 [Source:NCBI gene;Acc:100153880]
	ENSSSCG00000009683
SCARB1	ENSSSCG00000009759	scavenger receptor class B member 1 [Source:NCBI gene;Acc:397018]
NCOR2	ENSSSCG00000009761	nuclear receptor corepressor 2 [Source:NCBI gene;Acc:733643]
MTR	ENSSSCG00000010143	5-methyltetrahydrofolate-homocysteine methyltransferase [Source:NCBI gene;Acc:397300]
ACTN2	ENSSSCG00000010144	actinin alpha 2 [Source:NCBI gene;Acc:100157406]
SIPA1L2	ENSSSCG00000010169	signal induced proliferation associated 1 like 2 [Source:NCBI gene;Acc:100158048]
GALNT2	ENSSSCG00000010185	polypeptide N-acetylgalactosaminyltransferase 2 [Source:NCBI gene;Acc:100153028]
URB2	ENSSSCG00000010186	URB2 ribosome biogenesis homolog [Source:NCBI gene;Acc:100157881]
BICC1	ENSSSCG00000010204	BicC family RNA binding protein 1 [Source:NCBI gene;Acc:100154253]
ZNF365	ENSSSCG00000010222	zinc finger protein 365 [Source:NCBI gene;Acc:100157357]
SLC29A3	ENSSSCG00000010277	solute carrier family 29 member 3 [Source:NCBI gene;Acc:100153166]
CDH23	ENSSSCG00000010278	cadherin related 23 [Source:NCBI gene;Acc:100157198]
ZMIZ1	ENSSSCG00000010329	zinc finger MIZ-type containing 1 [Source:NCBI gene;Acc:100153816]
MAT1A	ENSSSCG00000010337	methionine adenosyltransferase 1A [Source:NCBI gene;Acc:100156922]
DYDC2	ENSSSCG00000010339	DPY30 domain containing 2 [Source:NCBI gene;Acc:100525130]
PRXL2A	ENSSSCG00000010340	peroxiredoxin like 2A [Source:NCBI gene;Acc:100155717]
	ENSSSCG00000010369	pancreatic polypeptide receptor 1 [Source:NCBI gene;Acc:397475]
	ENSSSCG00000010370	annexin A8 [Source:NCBI gene;Acc:100155930]
GDF10	ENSSSCG00000010376	growth differentiation factor 10 [Source:NCBI gene;Acc:100519926]
PTPN20	ENSSSCG00000010377	protein tyrosine phosphatase non-receptor type 20 [Source:NCBI gene;Acc:100153108]
FRMPD2	ENSSSCG00000010379	FERM and PDZ domain containing 2 [Source:NCBI gene;Acc:100524830]
ERCC6	ENSSSCG00000010391	ERCC excision repair 6, chromatin remodeling factor [Source:NCBI gene;Acc:106504057]
CHAT	ENSSSCG00000010392	choline O-acetyltransferase [Source:NCBI gene;Acc:396896]
	ENSSSCG00000010393	chromosome 14 C10orf53 homolog [Source:NCBI gene;Acc:100153358]
ZFAND4	ENSSSCG00000010402	zinc finger AN1-type containing 4 [Source:NCBI gene;Acc:100152192]
ALOX5	ENSSSCG00000010404	arachidonate 5-lipoxygenase [Source:NCBI gene;Acc:100156205]
	ENSSSCG00000010426	protocadherin related 15 [Source:NCBI gene;Acc:100151991]
MBL2	ENSSSCG00000010427	mannose binding lectin 2 [Source:NCBI gene;Acc:397230]
DKK1	ENSSSCG00000010428	dickkopf WNT signaling pathway inhibitor 1 [Source:NCBI gene;Acc:100157640]
PRKG1	ENSSSCG00000010429	protein kinase cGMP-dependent 1 [Source:NCBI gene;Acc:733640]
PANK1	ENSSSCG00000010456	pantothenate kinase 1 [Source:NCBI gene;Acc:100154650]
ZFYVE27	ENSSSCG00000010528	zinc finger FYVE-type containing 27 [Source:NCBI gene;Acc:100154382]
CRTAC1	ENSSSCG00000010530	cartilage acidic protein 1 [Source:NCBI gene;Acc:100037974]
	ENSSSCG00000010531	R3H domain and coiled-coil containing 1 like [Source:NCBI gene;Acc:100151975]
LOXL4	ENSSSCG00000010532	lysyl oxidase like 4 [Source:NCBI gene;Acc:100157207]
PYROXD2	ENSSSCG00000010533	pyridine nucleotide-disulphide oxidoreductase domain 2 [Source:NCBI gene;Acc:100155159]
GOT1	ENSSSCG00000010537	glutamic-oxaloacetic transaminase 1 [Source:NCBI gene;Acc:396967]
NKX2-3	ENSSSCG00000010538	NK2 homeobox 3 [Source:NCBI gene;Acc:100152347]
STN1	ENSSSCG00000010605	STN1 subunit of CST complex [Source:NCBI gene;Acc:100157838]
SLK	ENSSSCG00000010606	STE20 like kinase [Source:NCBI gene;Acc:100156642]
ABLIM1	ENSSSCG00000010651	actin binding LIM protein 1 [Source:NCBI gene;Acc:100154343]
FAM160B1	ENSSSCG00000010652	family with sequence similarity 160 member B1 [Source:NCBI gene;Acc:100153060]
TRUB1	ENSSSCG00000010653	TruB pseudouridine synthase family member 1 [Source:NCBI gene;Acc:100151860]
WDR11	ENSSSCG00000010692	WD repeat domain 11 [Source:NCBI gene;Acc:100156416]
FGFR2	ENSSSCG00000010698	fibroblast growth factor receptor 2 [Source:NCBI gene;Acc:396762]
BTBD16	ENSSSCG00000010701	BTB domain containing 16 [Source:NCBI gene;Acc:100737536]
PLEKHA1	ENSSSCG00000010702	pleckstrin homology domain containing A1 [Source:NCBI gene;Acc:100157647]
HTRA1	ENSSSCG00000010703	HtrA serine peptidase 1 [Source:NCBI gene;Acc:100515628]
	ENSSSCG00000010718
	ENSSSCG00000010719	uncharacterized protein C10orf88 [Source:NCBI gene;Acc:100620521]
BUB3	ENSSSCG00000010726	BUB3 mitotic checkpoint protein [Source:NCBI gene;Acc:100156053]
GPR26	ENSSSCG00000010727	G protein-coupled receptor 26 [Source:NCBI gene;Acc:100154833]
CPXM2	ENSSSCG00000010728	carboxypeptidase X, M14 family member 2 [Source:NCBI gene;Acc:100153578]
	ENSSSCG00000010734	ornithine aminotransferase [Source:NCBI gene;Acc:100156865]
DHX32	ENSSSCG00000010744	DEAH-box helicase 32 (putative) [Source:NCBI gene;Acc:100152252]
	ENSSSCG00000010745	fibronectin type III and ankyrin repeat domains 1 [Source:NCBI gene;Acc:100153851]
C10orf90	ENSSSCG00000010747	chromosome 14 C10orf90 homolog [Source:NCBI gene;Acc:100156286]
MGMT	ENSSSCG00000010756	O-6-methylguanine-DNA methyltransferase [Source:NCBI gene;Acc:100155050]
TGFB2	ENSSSCG00000010816	transforming growth factor beta 2 [Source:NCBI gene;Acc:397084]
LYPLAL1	ENSSSCG00000010817	lysophospholipase like 1 [Source:NCBI gene;Acc:100515402]
RGS7	ENSSSCG00000010840	regulator of G protein signaling 7 [Source:NCBI gene;Acc:100521858]
AKT3	ENSSSCG00000010872	AKT serine/threonine kinase 3 [Source:NCBI gene;Acc:100513811]
DAPK1	ENSSSCG00000010949	death associated protein kinase 1 [Source:NCBI gene;Acc:100516103]
NTRK2	ENSSSCG00000010959	neurotrophic receptor tyrosine kinase 2 [Source:NCBI gene;Acc:100519209]
SLC28A3	ENSSSCG00000010960	solute carrier family 28 member 3 [Source:NCBI gene;Acc:100621750]
TMEM215	ENSSSCG00000011002	transmembrane protein 215 [Source:NCBI gene;Acc:100512303]
NDUFB6	ENSSSCG00000011003	NADH:ubiquinone oxidoreductase subunit B6 [Source:NCBI gene;Acc:733605]
JCAD	ENSSSCG00000011020	junctional cadherin 5 associated [Source:NCBI gene;Acc:100518508]
CUBN	ENSSSCG00000011030	cubilin [Source:NCBI gene;Acc:100521743]
VIM	ENSSSCG00000011033	vimentin [Source:NCBI gene;Acc:100522394]
ST8SIA6	ENSSSCG00000011034	ST8 alpha-N-acetyl-neuraminide alpha-2,8-sialyltransferase 6 [Source:NCBI gene;Acc:100522567]
STAM	ENSSSCG00000011036	signal transducing adaptor molecule [Source:NCBI gene;Acc:100523271]
TMEM236	ENSSSCG00000011037	transmembrane protein 236 [Source:NCBI gene;Acc:100523460]
MRC1	ENSSSCG00000011038	mannose receptor C-type 1 [Source:NCBI gene;Acc:445003]
CACNB2	ENSSSCG00000011040	calcium voltage-gated channel auxiliary subunit beta 2 [Source:NCBI gene;Acc:100524101]
NEBL	ENSSSCG00000011090	nebulette [Source:NCBI gene;Acc:100522395]
ITGB1	ENSSSCG00000011101	integrin subunit beta 1 [Source:NCBI gene;Acc:397019]
NRP1	ENSSSCG00000011102	neuropilin 1 [Source:NCBI gene;Acc:100286859]
USP6NL	ENSSSCG00000011120	USP6 N-terminal like [Source:NCBI gene;Acc:100514126]
	ENSSSCG00000011121	CUGBP Elav-like family member 2 [Source:NCBI gene;Acc:100737017]
GATA3	ENSSSCG00000011125	GATA binding protein 3 [Source:NCBI gene;Acc:733631]
PITRM1	ENSSSCG00000011157	pitrilysin metallopeptidase 1 [Source:NCBI gene;Acc:100521215]
RFTN1	ENSSSCG00000011198	raftlin, lipid raft linker 1 [Source:NCBI gene;Acc:100155924]
TBC1D5	ENSSSCG00000011199	TBC1 domain family member 5 [Source:NCBI gene;Acc:100626058]
SATB1	ENSSSCG00000011201	SATB homeobox 1 [Source:NCBI gene;Acc:100155111]
LRRC3B	ENSSSCG00000011216	leucine rich repeat containing 3B [Source:NCBI gene;Acc:100523139]
NEK10	ENSSSCG00000011217	NIMA related kinase 10 [Source:NCBI gene;Acc:100622627]
TGFBR2	ENSSSCG00000011226	transforming growth factor beta receptor 2 [Source:NCBI gene;Acc:100038019]
	ENSSSCG00000011237	programmed cell death 6 interacting protein [Source:NCBI gene;Acc:100512811]
ARPP21	ENSSSCG00000011238	cAMP regulated phosphoprotein 21 [Source:NCBI gene;Acc:100512986]
TRANK1	ENSSSCG00000011239	tetratricopeptide repeat and ankyrin repeat containing 1 [Source:NCBI gene;Acc:102163142]
DCLK3	ENSSSCG00000011241	doublecortin like kinase 3 [Source:NCBI gene;Acc:100514320]
XYLB	ENSSSCG00000011254	xylulokinase [Source:NCBI gene;Acc:100628009]
SLC22A13	ENSSSCG00000011256	solute carrier family 22 member 13 [Source:NCBI gene;Acc:100518094]
CTNNB1	ENSSSCG00000011274	catenin beta 1 [Source:NCBI gene;Acc:397657]
ABHD5	ENSSSCG00000011297	abhydrolase domain containing 5 [Source:NCBI gene;Acc:497624]
EXOSC7	ENSSSCG00000011300	exosome component 7 [Source:NCBI gene;Acc:100511347]
PFKFB4	ENSSSCG00000011353	6-phosphofructo-2-kinase/fructose-2,6-biphosphatase 4 [Source:NCBI gene;Acc:100158056]
SHISA5	ENSSSCG00000011357	shisa family member 5 [Source:NCBI gene;Acc:100151983]
SHQ1	ENSSSCG00000011518	SHQ1, H/ACA ribonucleoprotein assembly factor [Source:NCBI gene;Acc:100511045]
GXYLT2	ENSSSCG00000011519	glucoside xylosyltransferase 2 [Source:NCBI gene;Acc:100511227]
CNTN3	ENSSSCG00000011522	contactin 3 [Source:NCBI gene;Acc:100511594]
CHL1	ENSSSCG00000011524	cell adhesion molecule L1 like [Source:NCBI gene;Acc:100511780]
RBP1	ENSSSCG00000011664	retinol binding protein 1 [Source:NCBI gene;Acc:100156666]
ZPLD1	ENSSSCG00000011947	zona pellucida like domain containing 1 [Source:NCBI gene;Acc:100153011]
TMPRSS15	ENSSSCG00000012019	transmembrane serine protease 15 [Source:NCBI gene;Acc:397152]
MRPL39	ENSSSCG00000012021	mitochondrial ribosomal protein L39 [Source:NCBI gene;Acc:100521866]
BACH1	ENSSSCG00000012029	BTB domain and CNC homolog 1 [Source:NCBI gene;Acc:100523514]
	ENSSSCG00000012875	two pore segment channel 2 [Source:NCBI gene;Acc:100523421]
PPP6R3	ENSSSCG00000012884	protein phosphatase 6 regulatory subunit 3 [Source:NCBI gene;Acc:100524129]
FRMD8	ENSSSCG00000012992	FERM domain containing 8 [Source:NCBI gene;Acc:100518413]
RAB3IL1	ENSSSCG00000013074	RAB3A interacting protein like 1 [Source:NCBI gene;Acc:100739680]
DAGLA	ENSSSCG00000013079	diacylglycerol lipase alpha [Source:NCBI gene;Acc:100520824]
CD6	ENSSSCG00000013111	CD6 molecule [Source:NCBI gene;Acc:100513519]
OSBP	ENSSSCG00000013125	oxysterol binding protein [Source:NCBI gene;Acc:100515007]
	ENSSSCG00000013151
OR5B21	ENSSSCG00000013157	olfactory receptor 1444 [Source:NCBI gene;Acc:106509345]
	ENSSSCG00000013170	olfactory receptor 6Q1 [Source:NCBI gene;Acc:100519351]
SERPING1	ENSSSCG00000013181	serpin family G member 1 [Source:NCBI gene;Acc:100144304]
CHST1	ENSSSCG00000013273	carbohydrate sulfotransferase 1 [Source:NCBI gene;Acc:100519885]
TTC17	ENSSSCG00000013284	tetratricopeptide repeat domain 17 [Source:NCBI gene;Acc:100739017]
LRRC4C	ENSSSCG00000013286	leucine rich repeat containing 4C [Source:NCBI gene;Acc:106509370]
CD44	ENSSSCG00000013297	CD44 molecule (Indian blood group) [Source:NCBI gene;Acc:100525150]
PDHX	ENSSSCG00000013298	pyruvate dehydrogenase complex component X [Source:NCBI gene;Acc:100525559]
EIF3M	ENSSSCG00000013315	eukaryotic translation initiation factor 3 subunit M [Source:NCBI gene;Acc:100513781]
BBOX1	ENSSSCG00000013337	gamma-butyrobetaine hydroxylase 1 [Source:NCBI gene;Acc:100519353]
INSC	ENSSSCG00000013385	INSC spindle orientation adaptor protein [Source:NCBI gene;Acc:100515187]
ARNTL	ENSSSCG00000013397	aryl hydrocarbon receptor nuclear translocator like [Source:NCBI gene;Acc:100037286]
WEE1	ENSSSCG00000013411	WEE1 G2 checkpoint kinase [Source:NCBI gene;Acc:100521487]
SAFB2	ENSSSCG00000013523	scaffold attachment factor B2 [Source:NCBI gene;Acc:100515877]
	ENSSSCG00000013556	adhesion G protein-coupled receptor E1 [Source:NCBI gene;Acc:100521889]
COMMD10	ENSSSCG00000014223	COMM domain containing 10 [Source:NCBI gene;Acc:100522728]
SEMA6A	ENSSSCG00000014224	semaphorin 6A [Source:NCBI gene;Acc:100522008]
FTMT	ENSSSCG00000014231	ferritin mitochondrial [Source:NCBI gene;Acc:100524926]
CSNK1G3	ENSSSCG00000014240	casein kinase 1 gamma 3 [Source:NCBI gene;Acc:100511866]
	ENSSSCG00000014242
FSTL4	ENSSSCG00000014293	follistatin like 4 [Source:NCBI gene;Acc:100525565]
SEC24A	ENSSSCG00000014304	SEC24 homolog A, COPII coat complex component [Source:NCBI gene;Acc:100511986]
SLC25A48	ENSSSCG00000014311	solute carrier family 25 member 48 [Source:NCBI gene;Acc:100518721]
TGFBI	ENSSSCG00000014316	transforming growth factor beta induced [Source:NCBI gene;Acc:100519300]
SMAD5	ENSSSCG00000014319	SMAD family member 5 [Source:NCBI gene;Acc:100624262]
KLHL3	ENSSSCG00000014321	kelch like family member 3 [Source:NCBI gene;Acc:100519539]
	ENSSSCG00000014368	uncharacterized LOC100513976 [Source:NCBI gene;Acc:100513976]
CD14	ENSSSCG00000014369	CD14 molecule [Source:NCBI gene;Acc:100037938]
PLAC8L1	ENSSSCG00000014408	PLAC8 like 1 [Source:NCBI gene;Acc:100525635]
JAKMIP2	ENSSSCG00000014420	janus kinase and microtubule interacting protein 2 [Source:NCBI gene;Acc:100511808]
	ENSSSCG00000014896
FAM181B	ENSSSCG00000014897	family with sequence similarity 181 member B [Source:NCBI gene;Acc:100517667]
SYTL2	ENSSSCG00000014909	synaptotagmin like 2 [Source:NCBI gene;Acc:100627498]
CHORDC1	ENSSSCG00000014934	cysteine and histidine rich domain containing 1 [Source:NCBI gene;Acc:100134961]
PDGFD	ENSSSCG00000014994	platelet derived growth factor D [Source:NCBI gene;Acc:100524161]
POU2AF1	ENSSSCG00000015016	POU class 2 homeobox associating factor 1 [Source:NCBI gene;Acc:100512063]
BTG4	ENSSSCG00000015020	BTG anti-proliferation factor 4 [Source:NCBI gene;Acc:100514308]
NCAM1	ENSSSCG00000015045	neural cell adhesion molecule 1 [Source:NCBI gene;Acc:100515564]
BUD13	ENSSSCG00000015065	BUD13 homolog [Source:NCBI gene;Acc:100521913]
DSCAML1	ENSSSCG00000015082	DS cell adhesion molecule like 1 [Source:NCBI gene;Acc:100511146]
CRPPA	ENSSSCG00000015358	CDP-L-ribitol pyrophosphorylase A [Source:NCBI gene;Acc:100623666]
SP4	ENSSSCG00000015378	Sp4 transcription factor [Source:NCBI gene;Acc:100620437]
DNAH11	ENSSSCG00000015379	dynein axonemal heavy chain 11 [Source:NCBI gene;Acc:100620543]
SLC26A5	ENSSSCG00000015425	solute carrier family 26 member 5 [Source:NCBI gene;Acc:100190993]
ATXN7L1	ENSSSCG00000015432	ataxin 7 like 1 [Source:NCBI gene;Acc:100517110]
NRCAM	ENSSSCG00000015445	neuronal cell adhesion molecule [Source:NCBI gene;Acc:100520970]
NMNAT2	ENSSSCG00000015557	nicotinamide nucleotide adenylyltransferase 2 [Source:NCBI gene;Acc:100515332]
IVNS1ABP	ENSSSCG00000015570	influenza virus NS1A binding protein [Source:NCBI gene;Acc:100302027]
PROX1	ENSSSCG00000015584	prospero homeobox 1 [Source:NCBI gene;Acc:100169702]
VASH2	ENSSSCG00000015589	vasohibin 2 [Source:NCBI gene;Acc:100525601]
FLVCR1	ENSSSCG00000015590	FLVCR heme transporter 1 [Source:NCBI gene;Acc:100217398]
FAM71A	ENSSSCG00000015596	family with sequence similarity 71 member A [Source:NCBI gene;Acc:100524701]
PPP2R5A	ENSSSCG00000015599	protein phosphatase 2 regulatory subunit B'alpha [Source:NCBI gene;Acc:100101925]
DTL	ENSSSCG00000015600	denticleless E3 ubiquitin protein ligase homolog [Source:NCBI gene;Acc:100525066]
G0S2	ENSSSCG00000015617	G0/G1 switch 2 [Source:NCBI gene;Acc:100624161]
VSTM2A	ENSSSCG00000015636	V-set and transmembrane domain containing 2A [Source:NCBI gene;Acc:100517233]
GTDC1	ENSSSCG00000015670	glycosyltransferase like domain containing 1 [Source:NCBI gene;Acc:100152895]
ACMSD	ENSSSCG00000015699	aminocarboxymuconate semialdehyde decarboxylase [Source:NCBI gene;Acc:100154768]
TMEM163	ENSSSCG00000015700	transmembrane protein 163 [Source:NCBI gene;Acc:100512373]
BIN1	ENSSSCG00000015720	bridging integrator 1 [Source:NCBI gene;Acc:100037305]
ERCC3	ENSSSCG00000015721	ERCC excision repair 3, TFIIH core complex helicase subunit [Source:NCBI gene;Acc:100517918]
CNTNAP5	ENSSSCG00000015726	contactin associated protein family member 5 [Source:NCBI gene;Acc:100622103]
CHRNA1	ENSSSCG00000015969	cholinergic receptor nicotinic alpha 1 subunit [Source:NCBI gene;Acc:396587]
VIL1	ENSSSCG00000016196	villin 1 [Source:NCBI gene;Acc:100156373]
CFAP65	ENSSSCG00000016203	cilia and flagella associated protein 65 [Source:NCBI gene;Acc:100155984]
DNER	ENSSSCG00000016258	delta/notch like EGF repeat containing [Source:NCBI gene;Acc:100518938]
CAB39	ENSSSCG00000016266	calcium binding protein 39 [Source:NCBI gene;Acc:100620726]
ITM2C	ENSSSCG00000016267	integral membrane protein 2C [Source:NCBI gene;Acc:100144481]
	ENSSSCG00000016269	spermatogenesis associated 3 [Source:NCBI gene;Acc:100153399]
SPP2	ENSSSCG00000016315	secreted phosphoprotein 2 [Source:NCBI gene;Acc:396669]
DPP6	ENSSSCG00000016423	dipeptidyl peptidase like 6 [Source:NCBI gene;Acc:100621864]
	ENSSSCG00000016426	actin related protein 3B [Source:NCBI gene;Acc:102159531]
TRPV5	ENSSSCG00000016469	transient receptor potential cation channel subfamily V member 5 [Source:NCBI gene;Acc:100622162]
	ENSSSCG00000016475
CTNND2	ENSSSCG00000016780	catenin delta 2 [Source:NCBI gene;Acc:100517978]
ANKH	ENSSSCG00000016784	ANKH inorganic pyrophosphate transport regulator [Source:NCBI gene;Acc:100624458]
ADAMTS12	ENSSSCG00000016816	ADAM metallopeptidase with thrombospondin type 1 motif 12 [Source:NCBI gene;Acc:100511353]
SLC45A2	ENSSSCG00000016821	solute carrier family 45 member 2 [Source:NCBI gene;Acc:606748]
LIFR	ENSSSCG00000016850	leukemia inhibitory factor receptor [Source:NCBI gene;Acc:102167255]
GHR	ENSSSCG00000016866	growth hormone receptor [Source:NCBI gene;Acc:397488]
CCDC152	ENSSSCG00000016867	coiled-coil domain containing 152 [Source:NCBI gene;Acc:100523519]
PARP8	ENSSSCG00000016882	poly(ADP-ribose) polymerase family member 8 [Source:NCBI gene;Acc:100511108]
ADRA1B	ENSSSCG00000017041	adrenoceptor alpha 1B [Source:NCBI gene;Acc:100519931]
GALNT10	ENSSSCG00000017072	polypeptide N-acetylgalactosaminyltransferase 10 [Source:NCBI gene;Acc:100511419]
FAM114A2	ENSSSCG00000017073	family with sequence similarity 114 member A2 [Source:NCBI gene;Acc:100511051]
NMUR2	ENSSSCG00000017076	neuromedin U receptor 2 [Source:NCBI gene;Acc:100217382]
	ENSSSCG00000017077
FAT2	ENSSSCG00000017084	FAT atypical cadherin 2 [Source:NCBI gene;Acc:102161049]
SEMA5A	ENSSSCG00000017095	semaphorin 5A [Source:NCBI gene;Acc:100737194]
C5orf49	ENSSSCG00000017098	chromosome 16 C5orf49 homolog [Source:NCBI gene;Acc:100516406]
FASTKD3	ENSSSCG00000017099	FAST kinase domains 3 [Source:NCBI gene;Acc:100516766]
MTRR	ENSSSCG00000017100	5-methyltetrahydrofolate-homocysteine methyltransferase reductase [Source:NCBI gene;Acc:100516580]
ADCY2	ENSSSCG00000017101	adenylate cyclase 2 [Source:NCBI gene;Acc:100517503]
NSUN2	ENSSSCG00000017104	NOP2/Sun RNA methyltransferase 2 [Source:NCBI gene;Acc:100518405]
	ENSSSCG00000017106	mediator complex subunit 10 [Source:NCBI gene;Acc:100518225]
ADAMTS16	ENSSSCG00000017109	ADAM metallopeptidase with thrombospondin type 1 motif 16 [Source:NCBI gene;Acc:100519115]
CCDC40	ENSSSCG00000017158	coiled-coil domain containing 40 [Source:NCBI gene;Acc:100514181]
TBC1D16	ENSSSCG00000017159	TBC1 domain family member 16 [Source:NCBI gene;Acc:100511401]
CBX4	ENSSSCG00000017160	chromobox 4 [Source:NCBI gene;Acc:100511584]
CD300LB	ENSSSCG00000017237	CD300 molecule like family member b [Source:NCBI gene;Acc:100623358]
RPL38	ENSSSCG00000017239	ribosomal protein L38 [Source:NCBI gene;Acc:100516393]
CDC42EP4	ENSSSCG00000017245	CDC42 effector protein 4 [Source:NCBI gene;Acc:100517117]
PRKCA	ENSSSCG00000017268	protein kinase C alpha [Source:NCBI gene;Acc:397184]
PECAM1	ENSSSCG00000017277	platelet and endothelial cell adhesion molecule 1 [Source:NCBI gene;Acc:396941]
	ENSSSCG00000017313	corticotropin releasing hormone receptor 1 [Source:NCBI gene;Acc:397426]
TEX14	ENSSSCG00000017645	testis expressed 14, intercellular bridge forming factor [Source:NCBI gene;Acc:100737915]
GLP2R	ENSSSCG00000017998	glucagon like peptide 2 receptor [Source:NCBI gene;Acc:100515966]
MAP2K4	ENSSSCG00000018016	mitogen-activated protein kinase kinase 4 [Source:NCBI gene;Acc:100520100]
TEKT3	ENSSSCG00000018028	tektin 3 [Source:NCBI gene;Acc:100522896]
SLC5A10	ENSSSCG00000018049	solute carrier family 5 member 10 [Source:NCBI gene;Acc:497235]
U1	ENSSSCG00000018237	U1 spliceosomal RNA [Source:RFAM;Acc:RF00003]
U6	ENSSSCG00000018576	U6 spliceosomal RNA [Source:RFAM;Acc:RF00026]
U6	ENSSSCG00000018744	U6 spliceosomal RNA [Source:RFAM;Acc:RF00026]
U6	ENSSSCG00000018941	U6 spliceosomal RNA [Source:RFAM;Acc:RF00026]
ssc-mir-184	ENSSSCG00000019343	ssc-mir-184 [Source:miRBase;Acc:MI0002421]
U6	ENSSSCG00000019425	U6 spliceosomal RNA [Source:RFAM;Acc:RF00026]
	ENSSSCG00000019555
U6	ENSSSCG00000019571	U6 spliceosomal RNA [Source:RFAM;Acc:RF00026]
U6	ENSSSCG00000020218	U6 spliceosomal RNA [Source:RFAM;Acc:RF00026]
U6	ENSSSCG00000020454	U6 spliceosomal RNA [Source:RFAM;Acc:RF00026]
U6	ENSSSCG00000020497	U6 spliceosomal RNA [Source:RFAM;Acc:RF00026]
SNORA70	ENSSSCG00000020544	Small nucleolar RNA SNORA70 [Source:RFAM;Acc:RF00156]
U6	ENSSSCG00000020605	U6 spliceosomal RNA [Source:RFAM;Acc:RF00026]
ATF7IP2	ENSSSCG00000020675	activating transcription factor 7 interacting protein 2 [Source:NCBI gene;Acc:100520369]
SLC22A11	ENSSSCG00000020831	solute carrier family 22 member 11 [Source:NCBI gene;Acc:100524419]
CDH9	ENSSSCG00000020845	cadherin 9 [Source:NCBI gene;Acc:100626823]
KIF13A	ENSSSCG00000020858	kinesin family member 13A [Source:NCBI gene;Acc:100625286]
	ENSSSCG00000021069	zinc finger protein 260-like [Source:NCBI gene;Acc:100739480]
CKS2	ENSSSCG00000021161	CDC28 protein kinase regulatory subunit 2 [Source:NCBI gene;Acc:100520933]
RNF216	ENSSSCG00000021285	ring finger protein 216 [Source:NCBI gene;Acc:100625422]
TRDMT1	ENSSSCG00000021309	tRNA aspartic acid methyltransferase 1 [Source:NCBI gene;Acc:100302362]
ZEB2	ENSSSCG00000021343	zinc finger E-box binding homeobox 2 [Source:NCBI gene;Acc:100739669]
PTGR1	ENSSSCG00000021386	prostaglandin reductase 1 [Source:NCBI gene;Acc:397678]
U6	ENSSSCG00000021394	U6 spliceosomal RNA [Source:RFAM;Acc:RF00026]
HIST1H2BD	ENSSSCG00000021411	histone cluster 1, H2bd [Source:NCBI gene;Acc:100157327]
SGK1	ENSSSCG00000021443	serum/glucocorticoid regulated kinase 1 [Source:NCBI gene;Acc:100625739]
U6	ENSSSCG00000021727	U6 spliceosomal RNA [Source:RFAM;Acc:RF00026]
ARHGEF38	ENSSSCG00000021764	Rho guanine nucleotide exchange factor 38 [Source:NCBI gene;Acc:100738766]
TBCK	ENSSSCG00000021784	TBC1 domain containing kinase [Source:NCBI gene;Acc:100738532]
ENOX1	ENSSSCG00000021818	ecto-NOX disulfide-thiol exchanger 1 [Source:NCBI gene;Acc:100525605]
TAPT1	ENSSSCG00000021828	transmembrane anterior posterior transformation 1 [Source:NCBI gene;Acc:100626638]
TUSC3	ENSSSCG00000021988	tumor suppressor candidate 3 [Source:NCBI gene;Acc:106504082]
APBB2	ENSSSCG00000022168	amyloid beta precursor protein binding family B member 2 [Source:NCBI gene;Acc:100514856]
MAT2A	ENSSSCG00000022300	methionine adenosyltransferase 2A [Source:NCBI gene;Acc:100312974]
ROPN1L	ENSSSCG00000022306	rhophilin associated tail protein 1 like [Source:NCBI gene;Acc:100620566]
TBPL1	ENSSSCG00000022387	TATA-box binding protein like 1 [Source:NCBI gene;Acc:100517563]
SLC3A2	ENSSSCG00000022404	solute carrier family 3 member 2 [Source:NCBI gene;Acc:100144589]
GRIA1	ENSSSCG00000022569	glutamate ionotropic receptor AMPA type subunit 1 [Source:NCBI gene;Acc:100623647]
FLOT1	ENSSSCG00000022725	flotillin 1 [Source:NCBI gene;Acc:100151746]
	ENSSSCG00000022820
IFFO2	ENSSSCG00000022839	intermediate filament family orphan 2 [Source:NCBI gene;Acc:100737107]
KIF5C	ENSSSCG00000022919	kinesin family member 5C [Source:NCBI gene;Acc:100622102]
TMEM132E	ENSSSCG00000022987	transmembrane protein 132E [Source:NCBI gene;Acc:100519732]
ZNF704	ENSSSCG00000022989	zinc finger protein 704 [Source:NCBI gene;Acc:100157134]
ASCC1	ENSSSCG00000023130	activating signal cointegrator 1 complex subunit 1 [Source:NCBI gene;Acc:100512075]
VAV3	ENSSSCG00000023187	vav guanine nucleotide exchange factor 3 [Source:NCBI gene;Acc:100151826]
U6	ENSSSCG00000023240	U6 spliceosomal RNA [Source:RFAM;Acc:RF00026]
	ENSSSCG00000023415	amine sulfotransferase-like [Source:NCBI gene;Acc:100152150]
	ENSSSCG00000023419
TMEM156	ENSSSCG00000023785	transmembrane protein 156 [Source:NCBI gene;Acc:100525349]
MYRFL	ENSSSCG00000023936	myelin regulatory factor like [Source:NCBI gene;Acc:102165410]
TMTC2	ENSSSCG00000024065	transmembrane O-mannosyltransferase targeting cadherins 2 [Source:NCBI gene;Acc:100620150]
	ENSSSCG00000024077
ANO1	ENSSSCG00000024158	anoctamin 1 [Source:NCBI gene;Acc:100738137]
GABRR2	ENSSSCG00000024249	gamma-aminobutyric acid type A receptor subunit rho2 [Source:NCBI gene;Acc:100522289]
CCR2	ENSSSCG00000024311	C-C motif chemokine receptor 2 [Source:NCBI gene;Acc:414372]
CCR5	ENSSSCG00000024344	chemokine (C-C motif) receptor 5 [Source:NCBI gene;Acc:414371]
THEMIS	ENSSSCG00000024392	thymocyte selection associated [Source:NCBI gene;Acc:100737188]
CHRNA9	ENSSSCG00000024428	cholinergic receptor nicotinic alpha 9 subunit [Source:NCBI gene;Acc:100513414]
	ENSSSCG00000024467	shisa family member 6 [Source:NCBI gene;Acc:100624731]
SFMBT2	ENSSSCG00000024480	Scm like with four mbt domains 2 [Source:NCBI gene;Acc:100621009]
U2	ENSSSCG00000024491	U2 spliceosomal RNA [Source:RFAM;Acc:RF00004]
KLHL18	ENSSSCG00000024513	kelch like family member 18 [Source:NCBI gene;Acc:100736900]
NOCT	ENSSSCG00000024596	nocturnin [Source:NCBI gene;Acc:100513746]
TMEM125	ENSSSCG00000024697	transmembrane protein 125 [Source:NCBI gene;Acc:100519781]
SYT12	ENSSSCG00000024837	synaptotagmin 12 [Source:NCBI gene;Acc:100625267]
TCP11L2	ENSSSCG00000024881	t-complex 11 like 2 [Source:NCBI gene;Acc:100620963]
STX12	ENSSSCG00000024927	syntaxin 12 [Source:NCBI gene;Acc:100627750]
SYNDIG1L	ENSSSCG00000025000	synapse differentiation inducing 1 like [Source:NCBI gene;Acc:100514113]
	ENSSSCG00000025022	fer-1 like family member 5 [Source:NCBI gene;Acc:100627869]
RYBP	ENSSSCG00000025053	RING1 and YY1 binding protein [Source:NCBI gene;Acc:100526249]
RNF19B	ENSSSCG00000025206	ring finger protein 19B [Source:NCBI gene;Acc:100621544]
ULK4	ENSSSCG00000025408	unc-51 like kinase 4 [Source:NCBI gene;Acc:100522104]
	ENSSSCG00000025527
	ENSSSCG00000025644	CD1 antigen [Source:NCBI gene;Acc:396785]
DENND2D	ENSSSCG00000025704	DENN domain containing 2D [Source:NCBI gene;Acc:100157652]
TMPRSS7	ENSSSCG00000025721	transmembrane serine protease 7 [Source:NCBI gene;Acc:100627225]
TMEM72	ENSSSCG00000025787	transmembrane protein 72 [Source:NCBI gene;Acc:100512136]
SFRP1	ENSSSCG00000025822	secreted frizzled related protein 1 [Source:NCBI gene;Acc:100621622]
SGPP2	ENSSSCG00000025993	sphingosine-1-phosphate phosphatase 2 [Source:NCBI gene;Acc:100524832]
PROK2	ENSSSCG00000026200	prokineticin 2 [Source:NCBI gene;Acc:100526076]
STMN1	ENSSSCG00000026257	stathmin 1 [Source:NCBI gene;Acc:494463]
	ENSSSCG00000026302	marker of proliferation Ki-67 [Source:NCBI gene;Acc:102164100]
ABCA8	ENSSSCG00000026473	ATP-binding cassette sub-family A member 8 [Source:NCBI gene;Acc:100520512]
ZNF621	ENSSSCG00000026550	zinc finger protein 621 [Source:NCBI gene;Acc:100623639]
BATF3	ENSSSCG00000026587	basic leucine zipper ATF-like transcription factor 3 [Source:NCBI gene;Acc:100621683]
KCND3	ENSSSCG00000026680	potassium voltage-gated channel subfamily D member 3 [Source:NCBI gene;Acc:100037946]
TMEM150C	ENSSSCG00000026729	transmembrane protein 150C [Source:NCBI gene;Acc:100622888]
LPCAT3	ENSSSCG00000027205	lysophosphatidylcholine acyltransferase 3 [Source:NCBI gene;Acc:100627653]
COL6A3	ENSSSCG00000027331	collagen type VI alpha 3 chain [Source:NCBI gene;Acc:100101551]
	ENSSSCG00000027348	WAS/WASL interacting protein family member 1 [Source:NCBI gene;Acc:100154822]
	ENSSSCG00000027349	TBC1 domain family member 14 [Source:NCBI gene;Acc:100622341]
PLCD1	ENSSSCG00000027550	phospholipase C delta 1 [Source:NCBI gene;Acc:100627099]
FUCA1	ENSSSCG00000027659	alpha-L-fucosidase 1 [Source:NCBI gene;Acc:100621112]
FOXP1	ENSSSCG00000027675	forkhead box P1 [Source:NCBI gene;Acc:100525716]
CA14	ENSSSCG00000027875	carbonic anhydrase 14 [Source:NCBI gene;Acc:100153371]
ZWINT	ENSSSCG00000027984	ZW10 interacting kinetochore protein [Source:NCBI gene;Acc:100623641]
SECISBP2	ENSSSCG00000028033	SECIS binding protein 2 [Source:NCBI gene;Acc:100153797]
FBXL7	ENSSSCG00000028239	F-box and leucine rich repeat protein 7 [Source:NCBI gene;Acc:100521047]
	ENSSSCG00000028308
ELAC2	ENSSSCG00000028465	elaC ribonuclease Z 2 [Source:NCBI gene;Acc:100520804]
CEL	ENSSSCG00000028671	carboxyl ester lipase [Source:NCBI gene;Acc:100625953]
ssc-mir-4331-2	ENSSSCG00000028775	ssc-mir-4331-2 [Source:miRBase;Acc:MI0033415]
PPP2R2B	ENSSSCG00000028976	protein phosphatase 2 regulatory subunit Bbeta [Source:NCBI gene;Acc:397089]
TBC1D1	ENSSSCG00000028983	TBC1 domain family member 1 [Source:NCBI gene;Acc:100524447]
	ENSSSCG00000029003	60S ribosomal protein L14-like [Source:NCBI gene;Acc:100739087]
	ENSSSCG00000029043
BMP3	ENSSSCG00000029061	bone morphogenetic protein 3 [Source:NCBI gene;Acc:100512974]
LDB2	ENSSSCG00000029227	LIM domain binding 2 [Source:NCBI gene;Acc:100513100]
CHST15	ENSSSCG00000029482	carbohydrate sulfotransferase 15 [Source:NCBI gene;Acc:100152393]
RASGEF1B	ENSSSCG00000029507	RasGEF domain family member 1B [Source:NCBI gene;Acc:100337671]
Metazoa_SRP	ENSSSCG00000029693	Metazoan signal recognition particle RNA [Source:RFAM;Acc:RF00017]
PLCL2	ENSSSCG00000029811	phospholipase C like 2 [Source:NCBI gene;Acc:100625981]
U6	ENSSSCG00000029851	U6 spliceosomal RNA [Source:RFAM;Acc:RF00026]
COLGALT2	ENSSSCG00000030217	collagen beta(1-O)galactosyltransferase 2 [Source:NCBI gene;Acc:100624924]
XKR8	ENSSSCG00000030623	XK related 8 [Source:NCBI gene;Acc:100513931]
MPL	ENSSSCG00000030906	MPL proto-oncogene, thrombopoietin receptor [Source:NCBI gene;Acc:100626347]
ZFAT	ENSSSCG00000030947	zinc finger and AT-hook domain containing [Source:NCBI gene;Acc:100622516]
MAPK7	ENSSSCG00000031076	mitogen-activated protein kinase 7 [Source:NCBI gene;Acc:102164433]
SP8	ENSSSCG00000031078	Sp8 transcription factor [Source:NCBI gene;Acc:100627196]
	ENSSSCG00000031184	kinesin family member 6 [Source:NCBI gene;Acc:100514850]
FGF5	ENSSSCG00000031272	fibroblast growth factor 5 [Source:NCBI gene;Acc:100513672]
TCAIM	ENSSSCG00000031304	T cell activation inhibitor, mitochondrial [Source:NCBI gene;Acc:100627345]
UPK3A	ENSSSCG00000031423	uroplakin 3A [Source:NCBI gene;Acc:397558]
MTMR12	ENSSSCG00000031509	myotubularin related protein 12 [Source:NCBI gene;Acc:102167243]
	ENSSSCG00000031547	interactor of little elongation complex ELL subunit 1 [Source:NCBI gene;Acc:102164398]
MGST2	ENSSSCG00000031736	microsomal glutathione S-transferase 2 [Source:NCBI gene;Acc:100622296]
	ENSSSCG00000031776	TUB like protein 4 [Source:NCBI gene;Acc:100627260]
ZKSCAN5	ENSSSCG00000031809	zinc finger with KRAB and SCAN domains 5 [Source:NCBI gene;Acc:100522312]
CADM1	ENSSSCG00000031831	cell adhesion molecule 1 [Source:NCBI gene;Acc:106504882]
PAPSS1	ENSSSCG00000031901	3'-phosphoadenosine 5'-phosphosulfate synthase 1 [Source:NCBI gene;Acc:106504748]
GPC5	ENSSSCG00000031946	glypican 5 [Source:NCBI gene;Acc:100737621]
	ENSSSCG00000031962
U6	ENSSSCG00000032035	U6 spliceosomal RNA [Source:RFAM;Acc:RF00026]
U6	ENSSSCG00000032208	U6 spliceosomal RNA [Source:RFAM;Acc:RF00026]
CNOT10	ENSSSCG00000032220	CCR4-NOT transcription complex subunit 10 [Source:NCBI gene;Acc:100623377]
C8orf89	ENSSSCG00000032228	chromosome 4 C8orf89 homolog [Source:NCBI gene;Acc:100517709]
DEFB134	ENSSSCG00000032245	defensin beta 134 [Source:NCBI gene;Acc:106508066]
SPOCK1	ENSSSCG00000032423	SPARC (osteonectin), cwcv and kazal like domains proteoglycan 1 [Source:NCBI gene;Acc:100620623]
PLXDC2	ENSSSCG00000032444	plexin domain containing 2 [Source:NCBI gene;Acc:100522568]
LDHB	ENSSSCG00000032557	lactate dehydrogenase B [Source:NCBI gene;Acc:100621540]
U6	ENSSSCG00000032627	U6 spliceosomal RNA [Source:RFAM;Acc:RF00026]
PCDH18	ENSSSCG00000032749	protocadherin 18 [Source:NCBI gene;Acc:110262155]
KCTD16	ENSSSCG00000032826	potassium channel tetramerization domain containing 16 [Source:NCBI gene;Acc:110259528]
IMPAD1	ENSSSCG00000032846	inositol monophosphatase domain containing 1 [Source:NCBI gene;Acc:100156925]
NUAK1	ENSSSCG00000032861	NUAK family kinase 1 [Source:NCBI gene;Acc:100523669]
	ENSSSCG00000032866
	ENSSSCG00000032942	death associated protein [Source:NCBI gene;Acc:100523520]
SHANK2	ENSSSCG00000033043	SH3 and multiple ankyrin repeat domains 2 [Source:NCBI gene;Acc:102160500]
U6	ENSSSCG00000033044	U6 spliceosomal RNA [Source:RFAM;Acc:RF00026]
U6	ENSSSCG00000033058	U6 spliceosomal RNA [Source:RFAM;Acc:RF00026]
	ENSSSCG00000033070
ARL6IP5	ENSSSCG00000033154	ADP ribosylation factor like GTPase 6 interacting protein 5 [Source:NCBI gene;Acc:595127]
LY6H	ENSSSCG00000033353	lymphocyte antigen 6 family member H [Source:NCBI gene;Acc:100516078]
U6	ENSSSCG00000033409	U6 spliceosomal RNA [Source:RFAM;Acc:RF00026]
	ENSSSCG00000033473
	ENSSSCG00000033489
	ENSSSCG00000033606	histone H2A type 1 [Source:NCBI gene;Acc:100155734]
LOXL2	ENSSSCG00000033608	lysyl oxidase like 2 [Source:NCBI gene;Acc:110256870]
	ENSSSCG00000033637	chromosome 13 C3orf52 homolog [Source:NCBI gene;Acc:100626261]
H1-4	ENSSSCG00000033672	H1.4 linker histone, cluster member [Source:HGNC Symbol;Acc:HGNC:4718]
	ENSSSCG00000033794
SMIM2	ENSSSCG00000033908	small integral membrane protein 2 [Source:HGNC Symbol;Acc:HGNC:28776]
ALKAL1	ENSSSCG00000033922	ALK and LTK ligand 1 [Source:NCBI gene;Acc:110260296]
	ENSSSCG00000034022
	ENSSSCG00000034115
EYA4	ENSSSCG00000034139	EYA transcriptional coactivator and phosphatase 4 [Source:NCBI gene;Acc:100157256]
GTF2F2	ENSSSCG00000034156	general transcription factor IIF subunit 2 [Source:NCBI gene;Acc:100626869]
	ENSSSCG00000034247
ARL4C	ENSSSCG00000034293	ADP ribosylation factor like GTPase 4C [Source:NCBI gene;Acc:100514255]
SPECC1	ENSSSCG00000034364	sperm antigen with calponin homology and coiled-coil domains 1 [Source:NCBI gene;Acc:102158777]
	ENSSSCG00000034396	G-protein coupled receptor 6-like [Source:NCBI gene;Acc:110255904]
	ENSSSCG00000034561
JKAMP	ENSSSCG00000034798	JNK1/MAPK8 associated membrane protein [Source:NCBI gene;Acc:110262314]
JRKL	ENSSSCG00000034924	JRK like [Source:HGNC Symbol;Acc:HGNC:6200]
GDF6	ENSSSCG00000034943	growth differentiation factor 6 [Source:NCBI gene;Acc:110260254]
RASSF9	ENSSSCG00000034948	Ras association domain family member 9 [Source:NCBI gene;Acc:110260805]
CXCL12	ENSSSCG00000034973	C-X-C motif chemokine ligand 12 [Source:NCBI gene;Acc:494460]
ADORA2B	ENSSSCG00000035051	adenosine A2b receptor [Source:NCBI gene;Acc:606745]
PID1	ENSSSCG00000035058	phosphotyrosine interaction domain containing 1 [Source:NCBI gene;Acc:100302508]
OR9I1	ENSSSCG00000035278	olfactory receptor family 9 subfamily I member 1 [Source:HGNC Symbol;Acc:HGNC:14718]
SAAL1	ENSSSCG00000035393	tryptophan hydroxylase 1 [Source:NCBI gene;Acc:100511002]
	ENSSSCG00000035590
GPR55	ENSSSCG00000035592	G protein-coupled receptor 55 [Source:NCBI gene;Acc:100517685]
TMEM135	ENSSSCG00000035619	transmembrane protein 135 [Source:NCBI gene;Acc:100622644]
	ENSSSCG00000035654
KCTD8	ENSSSCG00000035712	potassium channel tetramerization domain containing 8 [Source:NCBI gene;Acc:106504637]
UBE2QL1	ENSSSCG00000035825	ubiquitin conjugating enzyme E2 Q family like 1 [Source:NCBI gene;Acc:100518586]
	ENSSSCG00000035848	lysozyme-like protein 1 [Source:NCBI gene;Acc:100517051]
OR10R2	ENSSSCG00000035925	olfactory receptor family 10 subfamily R member 2 [Source:HGNC Symbol;Acc:HGNC:14820]
DBX2	ENSSSCG00000035938	developing brain homeobox 2 [Source:NCBI gene;Acc:100738507]
THRB	ENSSSCG00000036033	thyroid hormone receptor beta [Source:NCBI gene;Acc:396776]
HSPB3	ENSSSCG00000036059	heat shock protein family B (small) member 3 [Source:NCBI gene;Acc:100519061]
	ENSSSCG00000036117
	ENSSSCG00000036123	vesicle-associated membrane protein 714-like [Source:NCBI gene;Acc:102163780]
	ENSSSCG00000036158
	ENSSSCG00000036165
SHMT1	ENSSSCG00000036208	serine hydroxymethyltransferase 1 [Source:NCBI gene;Acc:397181]
U6	ENSSSCG00000036337	U6 spliceosomal RNA [Source:RFAM;Acc:RF00026]
OVOL2	ENSSSCG00000036377	ovo like zinc finger 2 [Source:NCBI gene;Acc:100526083]
RBMS3	ENSSSCG00000036381	RNA binding motif single stranded interacting protein 3 [Source:NCBI gene;Acc:100739397]
GPX3	ENSSSCG00000036438	glutathione peroxidase 3 [Source:NCBI gene;Acc:396598]
	ENSSSCG00000036442
	ENSSSCG00000036460	defensin beta 112 [Source:NCBI gene;Acc:110261536]
BCO1	ENSSSCG00000036572	beta-carotene oxygenase 1 [Source:NCBI gene;Acc:100192320]
GPR27	ENSSSCG00000036580	G protein-coupled receptor 27 [Source:NCBI gene;Acc:110256466]
	ENSSSCG00000036669
	ENSSSCG00000036943	chromosome 9 C11orf87 homolog [Source:NCBI gene;Acc:100511522]
TRIM71	ENSSSCG00000036996	tripartite motif containing 71 [Source:NCBI gene;Acc:100623572]
	ENSSSCG00000037233
HNRNPDL	ENSSSCG00000037245	heterogeneous nuclear ribonucleoprotein D like [Source:NCBI gene;Acc:100511704]
CCDC85C	ENSSSCG00000037284	coiled-coil domain containing 85C [Source:NCBI gene;Acc:100512614]
DRGX	ENSSSCG00000037404	dorsal root ganglia homeobox [Source:NCBI gene;Acc:100154590]
KCNK16	ENSSSCG00000037484	potassium two pore domain channel subfamily K member 16 [Source:NCBI gene;Acc:100152855]
SORCS2	ENSSSCG00000037539	sortilin related VPS10 domain containing receptor 2 [Source:NCBI gene;Acc:102159930]
EPSTI1	ENSSSCG00000037572	epithelial stromal interaction 1 [Source:NCBI gene;Acc:100625050]
	ENSSSCG00000037645	coactosin like F-actin binding protein 1 [Source:NCBI gene;Acc:100621773]
	ENSSSCG00000037695
CFAP299	ENSSSCG00000037723	cilia and flagella associated protein 299 [Source:NCBI gene;Acc:102163490]
YPEL4	ENSSSCG00000037892	yippee like 4 [Source:NCBI gene;Acc:100520717]
ADIRF	ENSSSCG00000037918	adipogenesis regulatory factor [Source:NCBI gene;Acc:100154721]
CYYR1	ENSSSCG00000037935	cysteine and tyrosine rich 1 [Source:NCBI gene;Acc:100154451]
	ENSSSCG00000037959	collagen alpha-1(I) chain-like [Source:NCBI gene;Acc:110255867]
U6	ENSSSCG00000038012	U6 spliceosomal RNA [Source:RFAM;Acc:RF00026]
	ENSSSCG00000038066
CNTN6	ENSSSCG00000038152	contactin 6 [Source:NCBI gene;Acc:100512314]
LRRC8D	ENSSSCG00000038417	leucine rich repeat containing 8 VRAC subunit D [Source:NCBI gene;Acc:100737439]
PHOX2B	ENSSSCG00000038488	paired like homeobox 2B [Source:NCBI gene;Acc:100622938]
ssc-mir-9808	ENSSSCG00000038564	ssc-mir-9808 [Source:miRBase;Acc:MI0031575]
	ENSSSCG00000038602	SOGA family member 3 [Source:NCBI gene;Acc:100512321]
HS3ST3A1	ENSSSCG00000038622	heparan sulfate-glucosamine 3-sulfotransferase 3A1 [Source:NCBI gene;Acc:100625836]
	ENSSSCG00000038686
	ENSSSCG00000038708	5-formyltetrahydrofolate cyclo-ligase [Source:NCBI gene;Acc:102167410]
GDNF	ENSSSCG00000038727	glial cell derived neurotrophic factor [Source:NCBI gene;Acc:100322894]
CERK	ENSSSCG00000038763	ceramide kinase [Source:NCBI gene;Acc:110260834]
NPNT	ENSSSCG00000038801	nephronectin [Source:NCBI gene;Acc:100624725]
SLC36A3	ENSSSCG00000038877	solute carrier family 36 member 3 [Source:NCBI gene;Acc:100625371]
FREM1	ENSSSCG00000039025	FRAS1 related extracellular matrix 1 [Source:NCBI gene;Acc:100514332]
TRIB2	ENSSSCG00000039080	tribbles pseudokinase 2 [Source:NCBI gene;Acc:100525217]
	ENSSSCG00000039200
U6	ENSSSCG00000039253	U6 spliceosomal RNA [Source:RFAM;Acc:RF00026]
	ENSSSCG00000039256
RFX6	ENSSSCG00000039333	regulatory factor X6 [Source:NCBI gene;Acc:102161990]
SNX24	ENSSSCG00000039373	sorting nexin 24 [Source:NCBI gene;Acc:100526158]
BMP2	ENSSSCG00000039442	bone morphogenetic protein 2 [Source:NCBI gene;Acc:100157103]
ID3	ENSSSCG00000039514	inhibitor of DNA binding 3, HLH protein [Source:NCBI gene;Acc:100626978]
U6	ENSSSCG00000039588	U6 spliceosomal RNA [Source:RFAM;Acc:RF00026]
SSBP3	ENSSSCG00000039594	single stranded DNA binding protein 3 [Source:NCBI gene;Acc:100627329]
	ENSSSCG00000039612	malignant T-cell-amplified sequence 1 [Source:NCBI gene;Acc:100738684]
	ENSSSCG00000039717
	ENSSSCG00000039750	olfactory receptor 4D10-like [Source:NCBI gene;Acc:100522475]
	ENSSSCG00000039778	PRELI domain containing protein 3B-like [Source:NCBI gene;Acc:100525472]
SHC3	ENSSSCG00000039841	SHC adaptor protein 3 [Source:NCBI gene;Acc:102164918]
	ENSSSCG00000039851	olfactory receptor 5B2-like [Source:NCBI gene;Acc:100620101]
	ENSSSCG00000039900
MTUS1	ENSSSCG00000040013	microtubule associated scaffold protein 1 [Source:NCBI gene;Acc:100153650]
U6	ENSSSCG00000040014	U6 spliceosomal RNA [Source:RFAM;Acc:RF00026]
TMEM64	ENSSSCG00000040180	transmembrane protein 64 [Source:NCBI gene;Acc:100517583]
	ENSSSCG00000040200
ARNT2	ENSSSCG00000040288	aryl hydrocarbon receptor nuclear translocator 2 [Source:NCBI gene;Acc:100157219]
U6	ENSSSCG00000040302	U6 spliceosomal RNA [Source:RFAM;Acc:RF00026]
SERP2	ENSSSCG00000040405	stress associated endoplasmic reticulum protein family member 2 [Source:NCBI gene;Acc:110255818]
	ENSSSCG00000040472
WDFY2	ENSSSCG00000040538	WD repeat and FYVE domain containing 2 [Source:NCBI gene;Acc:100512431]
	ENSSSCG00000040610
	ENSSSCG00000040672
	ENSSSCG00000040936
NPTXR	ENSSSCG00000000092	neuronal pentraxin receptor [Source:NCBI gene;Acc:100521449]
LRIG3	ENSSSCG00000000455	leucine rich repeats and immunoglobulin like domains 3 [Source:NCBI gene;Acc:100155928]
PHLDA1	ENSSSCG00000000521	pleckstrin homology like domain family A member 1 [Source:NCBI gene;Acc:100523904]
ARNTL2	ENSSSCG00000000551	aryl hydrocarbon receptor nuclear translocator like 2 [Source:NCBI gene;Acc:100625791]
AEBP2	ENSSSCG00000000587	AE binding protein 2 [Source:NCBI gene;Acc:100522805]
KIF21A	ENSSSCG00000000779	kinesin family member 21A [Source:NCBI gene;Acc:100520674]
SYCP3	ENSSSCG00000000863	synaptonemal complex protein 3 [Source:NCBI gene;Acc:100523378]
FOXQ1	ENSSSCG00000000991	forkhead box Q1 [Source:NCBI gene;Acc:100152843]
ADTRP	ENSSSCG00000001048	androgen dependent TFPI regulating protein [Source:NCBI gene;Acc:100152943]
HIVEP1	ENSSSCG00000001049	HIVEP zinc finger 1 [Source:NCBI gene;Acc:100519608]
RNF144B	ENSSSCG00000001076	ring finger protein 144B [Source:NCBI gene;Acc:100155665]
ADGRF1	ENSSSCG00000001726	adhesion G protein-coupled receptor F1 [Source:NCBI gene;Acc:100158176]
RCCD1	ENSSSCG00000001822	RCC1 domain containing 1 [Source:NCBI gene;Acc:100155673]
UROC1	ENSSSCG00000001823	urocanate hydratase 1 [Source:NCBI gene;Acc:100157217]
MFGE8	ENSSSCG00000001834	milk fat globule EGF and factor V/VIII domain containing [Source:NCBI gene;Acc:397545]
ABHD2	ENSSSCG00000001835	abhydrolase domain containing 2 [Source:NCBI gene;Acc:100153434]
RLBP1	ENSSSCG00000001836	retinaldehyde binding protein 1 [Source:NCBI gene;Acc:100521278]
FANCI	ENSSSCG00000001837	FA complementation group I [Source:NCBI gene;Acc:100156260]
POLG	ENSSSCG00000001838	DNA polymerase gamma, catalytic subunit [Source:NCBI gene;Acc:100157469]
IDH2	ENSSSCG00000001852	isocitrate dehydrogenase (NADP(+)) 2 [Source:NCBI gene;Acc:397603]
PRKD1	ENSSSCG00000001975	protein kinase D1 [Source:NCBI gene;Acc:102165436]
PCNX1	ENSSSCG00000002330	pecanex 1 [Source:NCBI gene;Acc:100154536]
	ENSSSCG00000002348	acyl-CoA thioesterase 6 [Source:NCBI gene;Acc:100152868]
ACOT4	ENSSSCG00000002349	acyl-coenzyme A thioesterase 4 [Source:NCBI gene;Acc:100158115]
ALDH6A1	ENSSSCG00000002357	aldehyde dehydrogenase 6 family member A1 [Source:NCBI gene;Acc:100153301]
CEP128	ENSSSCG00000002410	centrosomal protein 128 [Source:NCBI gene;Acc:100520033]
SEL1L	ENSSSCG00000002414	SEL1L adaptor subunit of ERAD E3 ubiquitin ligase [Source:NCBI gene;Acc:100520751]
SPATA7	ENSSSCG00000002424	spermatogenesis associated 7 [Source:NCBI gene;Acc:100153278]
FBLN5	ENSSSCG00000002444	fibulin 5 [Source:NCBI gene;Acc:100155248]
	ENSSSCG00000002462	cytochrome c oxidase subunit 8C, mitochondrial [Source:NCBI gene;Acc:100157935]
PHKB	ENSSSCG00000002844	phosphorylase kinase regulatory subunit beta [Source:NCBI gene;Acc:100625881]
DLGAP1	ENSSSCG00000003690	DLG associated protein 1 [Source:NCBI gene;Acc:100627012]
MYL12A	ENSSSCG00000003691	myosin regulatory light chain 12B [Source:NCBI gene;Acc:414399]
CABLES1	ENSSSCG00000003705	Cdk5 and Abl enzyme substrate 1 [Source:NCBI gene;Acc:100526114]
SS18	ENSSSCG00000003716	SS18 subunit of BAF chromatin remodeling complex [Source:NCBI gene;Acc:100513410]
UBE2U	ENSSSCG00000003810	ubiquitin conjugating enzyme E2 U [Source:NCBI gene;Acc:100519034]
ECHDC2	ENSSSCG00000003854	enoyl-CoA hydratase domain containing 2 [Source:NCBI gene;Acc:100519847]
SPATA6	ENSSSCG00000003881	spermatogenesis associated 6 [Source:NCBI gene;Acc:100415810]
STX11	ENSSSCG00000004125	syntaxin 11 [Source:NCBI gene;Acc:100152253]
HACE1	ENSSSCG00000004364	HECT domain and ankyrin repeat containing E3 ubiquitin protein ligase 1 [Source:NCBI gene;Acc:100156102]
IMPG1	ENSSSCG00000004477	interphotoreceptor matrix proteoglycan 1 [Source:NCBI gene;Acc:100157094]
LIPG	ENSSSCG00000004509	lipase G, endothelial type [Source:NCBI gene;Acc:100155736]
MBD2	ENSSSCG00000004528	methyl-CpG binding domain protein 2 [Source:NCBI gene;Acc:100511112]
ONECUT1	ENSSSCG00000004616	one cut homeobox 1 [Source:NCBI gene;Acc:100152052]
EPB42	ENSSSCG00000004714	erythrocyte membrane protein band 4.2 [Source:NCBI gene;Acc:100152957]
TMX3	ENSSSCG00000004884	thioredoxin related transmembrane protein 3 [Source:NCBI gene;Acc:100518050]
SERPINB8	ENSSSCG00000004888	serpin B8 [Source:NCBI gene;Acc:100156248]
LRFN5	ENSSSCG00000004990	leucine rich repeat and fibronectin type III domain containing 5 [Source:NCBI gene;Acc:100156782]
	ENSSSCG00000005121
KDM4C	ENSSSCG00000005198	lysine demethylase 4C [Source:NCBI gene;Acc:100622077]
NR4A3	ENSSSCG00000005385	nuclear receptor subfamily 4 group A member 3 [Source:NCBI gene;Acc:397479]
TLR4	ENSSSCG00000005503	toll like receptor 4 [Source:NCBI gene;Acc:399541]
OR5C1	ENSSSCG00000005578	olfactory receptor family 5 subfamily C member 1 [Source:HGNC Symbol;Acc:HGNC:8331]
KCNV1	ENSSSCG00000006021	potassium voltage-gated channel modifier subfamily V member 1 [Source:NCBI gene;Acc:100155464]
LRP12	ENSSSCG00000006039	LDL receptor related protein 12 [Source:NCBI gene;Acc:100154103]
YWHAZ	ENSSSCG00000006062	tyrosine 3-monooxygenase/tryptophan 5-monooxygenase activation protein zeta [Source:NCBI gene;Acc:780440]
NDUFAF6	ENSSSCG00000006093	NADH:ubiquinone oxidoreductase complex assembly factor 6 [Source:NCBI gene;Acc:100152224]
RUNX1T1	ENSSSCG00000006115	RUNX1 partner transcriptional co-repressor 1 [Source:NCBI gene;Acc:100155449]
CPNE3	ENSSSCG00000006135	copine 3 [Source:NCBI gene;Acc:100152057]
CA2	ENSSSCG00000006140	carbonic anhydrase 2 [Source:NCBI gene;Acc:100154873]
SNX16	ENSSSCG00000006151	sorting nexin 16 [Source:NCBI gene;Acc:100157914]
TPD52	ENSSSCG00000006156	tumor protein D52 [Source:NCBI gene;Acc:100151928]
CRISPLD1	ENSSSCG00000006171	cysteine rich secretory protein LCCL domain containing 1 [Source:NCBI gene;Acc:100152961]
TGS1	ENSSSCG00000006251	trimethylguanosine synthase 1 [Source:NCBI gene;Acc:100157730]
	ENSSSCG00000007001
GPCPD1	ENSSSCG00000007043	glycerophosphocholine phosphodiesterase 1 [Source:NCBI gene;Acc:100152321]
SPTLC3	ENSSSCG00000007072	serine palmitoyltransferase long chain base subunit 3 [Source:NCBI gene;Acc:100519280]
	ENSSSCG00000007186	signal-regulatory protein beta-1-like [Source:NCBI gene;Acc:100626120]
DHX35	ENSSSCG00000007352	DEAH-box helicase 35 [Source:NCBI gene;Acc:100154906]
SULF2	ENSSSCG00000007456	sulfatase 2 [Source:NCBI gene;Acc:100152351]
INTS1	ENSSSCG00000007558	integrator complex subunit 1 [Source:NCBI gene;Acc:100523779]
ZNF484	ENSSSCG00000008066	zinc finger protein 484 [Source:NCBI gene;Acc:100624662]
ZC3H6	ENSSSCG00000008096	zinc finger CCCH-type containing 6 [Source:NCBI gene;Acc:100518421]
DHX15	ENSSSCG00000008756	DEAH-box helicase 15 [Source:NCBI gene;Acc:100517041]
TBC1D19	ENSSSCG00000008761	TBC1 domain family member 19 [Source:NCBI gene;Acc:100623223]
CORIN	ENSSSCG00000008813	corin, serine peptidase [Source:NCBI gene;Acc:100738048]
	ENSSSCG00000008860
GUCY1A1	ENSSSCG00000008866	guanylate cyclase 1 soluble subunit alpha 1 [Source:NCBI gene;Acc:553100]
CTSO	ENSSSCG00000008867	cathepsin O [Source:NCBI gene;Acc:100737564]
NAF1	ENSSSCG00000008887	nuclear assembly factor 1 ribonucleoprotein [Source:NCBI gene;Acc:100518673]
NPY1R	ENSSSCG00000008888	neuropeptide Y receptor Y1 [Source:NCBI gene;Acc:397547]
NPY5R	ENSSSCG00000008889	neuropeptide Y receptor Y5 [Source:NCBI gene;Acc:100517770]
	ENSSSCG00000008892	zinc finger protein 11-like [Source:NCBI gene;Acc:100620089]
	ENSSSCG00000008898	HOP homeobox [Source:NCBI gene;Acc:396692]
ARL9	ENSSSCG00000008899	ADP ribosylation factor like GTPase 9 [Source:NCBI gene;Acc:100521807]
PAICS	ENSSSCG00000008901	phosphoribosylaminoimidazole carboxylase and phosphoribosylaminoimidazolesuccinocarboxamide synthase [Source:NCBI gene;Acc:100521281]
PPAT	ENSSSCG00000008902	phosphoribosyl pyrophosphate amidotransferase [Source:NCBI gene;Acc:100522503]
IGFBP7	ENSSSCG00000008913	insulin like growth factor binding protein 7 [Source:NCBI gene;Acc:100302573]
TMPRSS11F	ENSSSCG00000008930	transmembrane protease serine 11F [Source:NCBI gene;Acc:100513296]
CCNG2	ENSSSCG00000008988	cyclin G2 [Source:NCBI gene;Acc:100523979]
GRID2	ENSSSCG00000009197	glutamate ionotropic receptor delta type subunit 2 [Source:NCBI gene;Acc:100516747]
B3GLCT	ENSSSCG00000009335	beta 3-glucosyltransferase [Source:NCBI gene;Acc:100517236]
TRPC4	ENSSSCG00000009362	transient receptor potential cation channel subfamily C member 4 [Source:NCBI gene;Acc:100157635]
COG6	ENSSSCG00000009369	component of oligomeric golgi complex 6 [Source:NCBI gene;Acc:100526131]
FOXO1	ENSSSCG00000009370	Sus scrofa forkhead box O1 (FOXO1), mRNA. [Source:RefSeq mRNA;Acc:NM_214014]
DLEU7	ENSSSCG00000009387	deleted in lymphocytic leukemia 7 [Source:NCBI gene;Acc:102165865]
RCBTB2	ENSSSCG00000009400	RCC1 and BTB domain containing protein 2 [Source:NCBI gene;Acc:100154691]
RB1	ENSSSCG00000009401	RB transcriptional corepressor 1 [Source:NCBI gene;Acc:100151828]
PCDH17	ENSSSCG00000009446	protocadherin 17 [Source:NCBI gene;Acc:100157362]
KCTD12	ENSSSCG00000009468	potassium channel tetramerization domain containing 12 [Source:HGNC Symbol;Acc:HGNC:14678]
	ENSSSCG00000009523	gamma-glutamylamine cyclotransferase [Source:NCBI gene;Acc:100524456]
ATP4B	ENSSSCG00000009561	ATPase H+/K+ transporting subunit beta [Source:NCBI gene;Acc:397131]
GRK1	ENSSSCG00000009562	G protein-coupled receptor kinase 1 [Source:NCBI gene;Acc:100620646]
RIMBP2	ENSSSCG00000009748	RIMS binding protein 2 [Source:NCBI gene;Acc:100153193]
SRRM4	ENSSSCG00000009845	serine/arginine repetitive matrix 4 [Source:NCBI gene;Acc:100156965]
TFIP11	ENSSSCG00000009962	tuftelin interacting protein 11 [Source:NCBI gene;Acc:768099]
ZNRF3	ENSSSCG00000009971	zinc and ring finger 3 [Source:NCBI gene;Acc:100153654]
KCNMA1	ENSSSCG00000010325	potassium calcium-activated channel subfamily M alpha 1 [Source:NCBI gene;Acc:397434]
POLR3A	ENSSSCG00000010327	RNA polymerase III subunit A [Source:NCBI gene;Acc:100156229]
HPSE2	ENSSSCG00000010535	heparanase 2 (inactive) [Source:NCBI gene;Acc:100157983]
CNNM2	ENSSSCG00000010593	cyclin and CBS domain divalent metal cation transport mediator 2 [Source:NCBI gene;Acc:100155831]
GPAM	ENSSSCG00000010631	glycerol-3-phosphate acyltransferase, mitochondrial [Source:NCBI gene;Acc:397629]
NPS	ENSSSCG00000010751	neuropeptide S [Source:HGNC Symbol;Acc:HGNC:33940]
TLR5	ENSSSCG00000010885	toll like receptor 5 [Source:NCBI gene;Acc:100144476]
ZBTB41	ENSSSCG00000010897	zinc finger and BTB domain containing 41 [Source:NCBI gene;Acc:100627731]
FRMD3	ENSSSCG00000010962	FERM domain containing 3 [Source:NCBI gene;Acc:100519727]
C9orf72	ENSSSCG00000011010	C9orf72-SMCR8 complex subunit [Source:NCBI gene;Acc:100515791]
CPNE4	ENSSSCG00000011178	copine 4 [Source:NCBI gene;Acc:100157532]
NEK11	ENSSSCG00000011181	NIMA related kinase 11 [Source:NCBI gene;Acc:100739585]
KCNH8	ENSSSCG00000011204	potassium voltage-gated channel subfamily H member 8 [Source:NCBI gene;Acc:100626552]
EFHB	ENSSSCG00000011205	EF-hand domain family member B [Source:NCBI gene;Acc:100519922]
ACTR8	ENSSSCG00000011458	actin related protein 8 [Source:NCBI gene;Acc:100154005]
FLNB	ENSSSCG00000011471	filamin B [Source:NCBI gene;Acc:100514491]
C3orf67	ENSSSCG00000011482	chromosome 13 C3orf67 homolog [Source:NCBI gene;Acc:100517781]
KY	ENSSSCG00000011646	kyphoscoliosis peptidase [Source:NCBI gene;Acc:100524398]
PLSCR4	ENSSSCG00000011690	phospholipid scramblase 4 [Source:NCBI gene;Acc:100518400]
ZIC1	ENSSSCG00000011692	Zic family member 1 [Source:NCBI gene;Acc:100153570]
VEPH1	ENSSSCG00000011726	ventricular zone expressed PH domain containing 1 [Source:NCBI gene;Acc:100512989]
SERPINI1	ENSSSCG00000011740	serpin family I member 1 [Source:NCBI gene;Acc:100154352]
GOLIM4	ENSSSCG00000011741	golgi integral membrane protein 4 [Source:NCBI gene;Acc:100517915]
PLD1	ENSSSCG00000011750	phospholipase D1 [Source:NCBI gene;Acc:100519446]
DNAJC19	ENSSSCG00000011770	DnaJ heat shock protein family (Hsp40) member C19 [Source:NCBI gene;Acc:100154656]
MAP3K13	ENSSSCG00000011791	mitogen-activated protein kinase kinase kinase 13 [Source:NCBI gene;Acc:100515448]
KNG1	ENSSSCG00000011802	kininogen 1 [Source:NCBI gene;Acc:396568]
EIF4A2	ENSSSCG00000011803	eukaryotic translation initiation factor 4A2 [Source:NCBI gene;Acc:100101928]
LPP	ENSSSCG00000011811	LIM domain containing preferred translocation partner in lipoma [Source:NCBI gene;Acc:100626969]
P3H2	ENSSSCG00000011813	prolyl 3-hydroxylase 2 [Source:NCBI gene;Acc:100520219]
MB21D2	ENSSSCG00000011819	Mab-21 domain containing 2 [Source:NCBI gene;Acc:100156951]
OPA1	ENSSSCG00000011822	OPA1 mitochondrial dynamin like GTPase [Source:NCBI gene;Acc:100522705]
ZNF148	ENSSSCG00000011858	zinc finger protein 148 [Source:NCBI gene;Acc:100515279]
SLC12A8	ENSSSCG00000011860	solute carrier family 12 member 8 [Source:NCBI gene;Acc:100623914]
PDIA5	ENSSSCG00000011870	protein disulfide isomerase family A member 5 [Source:NCBI gene;Acc:100518582]
USF3	ENSSSCG00000011918	upstream transcription factor family member 3 [Source:NCBI gene;Acc:100513627]
POU1F1	ENSSSCG00000011996	POU class 1 homeobox 1 [Source:NCBI gene;Acc:397325]
CADM2	ENSSSCG00000011999	cell adhesion molecule 2 [Source:NCBI gene;Acc:100626294]
GBE1	ENSSSCG00000012000	1,4-alpha-glucan branching enzyme 1 [Source:NCBI gene;Acc:100156209]
ROBO1	ENSSSCG00000012001	roundabout guidance receptor 1 [Source:NCBI gene;Acc:100517310]
HSPA13	ENSSSCG00000012007	heat shock protein family A (Hsp70) member 13 [Source:NCBI gene;Acc:100152073]
CHODL	ENSSSCG00000012018	chondrolectin [Source:NCBI gene;Acc:100520642]
TIAM1	ENSSSCG00000012034	TIAM Rac1 associated GEF 1 [Source:NCBI gene;Acc:100524587]
	ENSSSCG00000012047	family with sequence similarity 243 member A [Source:NCBI gene;Acc:102165034]
	ENSSSCG00000012049	Sus scrofa potassium voltage-gated channel subfamily E regulatory subunit 1 (KCNE1), mRNA. [Source:RefSeq mRNA;Acc:NM_214165]
RCAN1	ENSSSCG00000012050	regulator of calcineurin 1 [Source:NCBI gene;Acc:100511902]
	ENSSSCG00000012052
CBR3	ENSSSCG00000012053	carbonyl reductase 3 [Source:NCBI gene;Acc:100512990]
DOP1B	ENSSSCG00000012054	DOP1 leucine zipper like protein B [Source:NCBI gene;Acc:100513179]
DSCAM	ENSSSCG00000012072	DS cell adhesion molecule [Source:NCBI gene;Acc:100517192]
	ENSSSCG00000012074	beta-secretase 2 [Source:NCBI gene;Acc:100517374]
JMJD4	ENSSSCG00000013983	jumonji domain containing 4 [Source:NCBI gene;Acc:100512588]
MOGAT2	ENSSSCG00000014861	2-acylglycerol O-acyltransferase 2-like [Source:NCBI gene;Acc:110255553]
NOX4	ENSSSCG00000014927	NADPH oxidase 4 [Source:NCBI gene;Acc:100523323]
CWC15	ENSSSCG00000014961	CWC15 spliceosome associated protein homolog [Source:NCBI gene;Acc:100525240]
PGR	ENSSSCG00000014977	progesterone receptor [Source:NCBI gene;Acc:396805]
AASDHPPT	ENSSSCG00000014998	aminoadipate-semialdehyde dehydrogenase-phosphopantetheinyl transferase [Source:NCBI gene;Acc:100525064]
	ENSSSCG00000015023	ALG9 alpha-1,2-mannosyltransferase [Source:NCBI gene;Acc:100519965]
CBL	ENSSSCG00000015115	Cbl proto-oncogene [Source:NCBI gene;Acc:100518854]
GRIK4	ENSSSCG00000015131	glutamate ionotropic receptor kainate type subunit 4 [Source:NCBI gene;Acc:100523504]
KIRREL3	ENSSSCG00000015234	kirre like nephrin family adhesion molecule 3 [Source:NCBI gene;Acc:100515566]
ARHGAP32	ENSSSCG00000015238	Rho GTPase activating protein 32 [Source:NCBI gene;Acc:100737512]
ADAMTS15	ENSSSCG00000015250	ADAM metallopeptidase with thrombospondin type 1 motif 15 [Source:NCBI gene;Acc:100518325]
SNX19	ENSSSCG00000015252	sorting nexin 19 [Source:NCBI gene;Acc:100519207]
DMTF1	ENSSSCG00000015393	cyclin D binding myb like transcription factor 1 [Source:NCBI gene;Acc:100521327]
KIAA1324L	ENSSSCG00000015394	KIAA1324 like [Source:NCBI gene;Acc:100523199]
GRM3	ENSSSCG00000015395	glutamate metabotropic receptor 3 [Source:NCBI gene;Acc:100521916]
SEMA3D	ENSSSCG00000015396	semaphorin 3D [Source:NCBI gene;Acc:100523915]
SEMA3A	ENSSSCG00000015398	semaphorin 3A [Source:NCBI gene;Acc:100620398]
SEMA3E	ENSSSCG00000015399	semaphorin 3E [Source:NCBI gene;Acc:100524100]
PCLO	ENSSSCG00000015401	piccolo presynaptic cytomatrix protein [Source:NCBI gene;Acc:100524640]
HGF	ENSSSCG00000015403	hepatocyte growth factor [Source:NCBI gene;Acc:100525120]
CD36	ENSSSCG00000015405	CD36 molecule [Source:NCBI gene;Acc:733702]
GNAT3	ENSSSCG00000015406	G protein subunit alpha transducin 3 [Source:NCBI gene;Acc:100511528]
GNAI1	ENSSSCG00000015407	G protein subunit alpha i1 [Source:NCBI gene;Acc:100144419]
TNFSF18	ENSSSCG00000015487	TNF superfamily member 18 [Source:NCBI gene;Acc:100516458]
RABGAP1L	ENSSSCG00000015499	RAB GTPase activating protein 1 like [Source:NCBI gene;Acc:100519968]
BRINP2	ENSSSCG00000015515	BMP/retinoic acid inducible neural specific 2 [Source:NCBI gene;Acc:100522028]
RPS6KC1	ENSSSCG00000015586	ribosomal protein S6 kinase C1 [Source:NCBI gene;Acc:100522456]
VWC2	ENSSSCG00000015626	von Willebrand factor C domain containing 2 [Source:NCBI gene;Acc:100515158]
GRB10	ENSSSCG00000015631	growth factor receptor bound protein 10 [Source:NCBI gene;Acc:100188977]
KYNU	ENSSSCG00000015673	kynureninase [Source:NCBI gene;Acc:100521160]
ZRANB3	ENSSSCG00000015694	zinc finger RANBP2-type containing 3 [Source:NCBI gene;Acc:100157618]
ACTR3	ENSSSCG00000015710	actin related protein 3 [Source:NCBI gene;Acc:396738]
DPP10	ENSSSCG00000015711	dipeptidyl peptidase like 10 [Source:NCBI gene;Acc:100157195]
DDX18	ENSSSCG00000015712	DEAD-box helicase 18 [Source:NCBI gene;Acc:100153560]
EN1	ENSSSCG00000015715	engrailed homeobox 1 [Source:NCBI gene;Acc:100516112]
PTPN4	ENSSSCG00000015743	protein tyrosine phosphatase non-receptor type 4 [Source:NCBI gene;Acc:100522902]
VEGFC	ENSSSCG00000015770	vascular endothelial growth factor C [Source:NCBI gene;Acc:100525960]
	ENSSSCG00000015806
UNC5D	ENSSSCG00000015830	unc-5 netrin receptor D [Source:NCBI gene;Acc:100156454]
TNKS	ENSSSCG00000015851	tankyrase [Source:NCBI gene;Acc:100153228]
	ENSSSCG00000015889
XIRP2	ENSSSCG00000015917	xin actin binding repeat containing 2 [Source:NCBI gene;Acc:397689]
KLHL23	ENSSSCG00000015937	kelch like family member 23 [Source:NCBI gene;Acc:100520221]
UBR3	ENSSSCG00000015940	ubiquitin protein ligase E3 component n-recognin 3 [Source:NCBI gene;Acc:100521299]
PDK1	ENSSSCG00000015958	pyruvate dehydrogenase kinase 1 [Source:NCBI gene;Acc:100286871]
RAPGEF4	ENSSSCG00000015959	Rap guanine nucleotide exchange factor 4 [Source:NCBI gene;Acc:100511786]
ITGA4	ENSSSCG00000016009	integrin subunit alpha 4 [Source:NCBI gene;Acc:100521477]
ZNF804A	ENSSSCG00000016022	zinc finger protein 804A [Source:NCBI gene;Acc:100524346]
ZC3H15	ENSSSCG00000016026	zinc finger CCCH-type containing 15 [Source:NCBI gene;Acc:100158058]
ITGAV	ENSSSCG00000016027	integrin subunit alpha V [Source:NCBI gene;Acc:397285]
MFSD6	ENSSSCG00000016052	major facilitator superfamily domain containing 6 [Source:NCBI gene;Acc:100037960]
NEMP2	ENSSSCG00000016053	nuclear envelope integral membrane protein 2 [Source:NCBI gene;Acc:100515587]
MYO1B	ENSSSCG00000016061	myosin IB [Source:NCBI gene;Acc:100517198]
NABP1	ENSSSCG00000016062	nucleic acid binding protein 1 [Source:NCBI gene;Acc:100155066]
TMEFF2	ENSSSCG00000016064	transmembrane protein with EGF like and two follistatin like domains 2 [Source:NCBI gene;Acc:654831]
STK17B	ENSSSCG00000016067	serine/threonine kinase 17b [Source:NCBI gene;Acc:100153033]
PLCL1	ENSSSCG00000016083	phospholipase C like 1 [Source:NCBI gene;Acc:100521161]
	ENSSSCG00000016085	formiminotransferase N-terminal subdomain-containing protein-like [Source:NCBI gene;Acc:100522040]
C2orf69	ENSSSCG00000016086	chromosome 2 open reading frame 69 [Source:HGNC Symbol;Acc:HGNC:26799]
TYW5	ENSSSCG00000016087	tRNA-yW synthesizing protein 5 [Source:NCBI gene;Acc:100522402]
SPATS2L	ENSSSCG00000016090	spermatogenesis associated serine rich 2 like [Source:NCBI gene;Acc:100415809]
	ENSSSCG00000016093	aldehyde oxidase 2 [Source:NCBI gene;Acc:100525616]
BZW1	ENSSSCG00000016094	basic leucine zipper and W2 domains 1 [Source:NCBI gene;Acc:100152909]
ORC2	ENSSSCG00000016098	origin recognition complex subunit 2 [Source:NCBI gene;Acc:106510112]
NDUFB3	ENSSSCG00000016100	NADH:ubiquinone oxidoreductase subunit B3 [Source:NCBI gene;Acc:100525083]
CFLAR	ENSSSCG00000016101	CASP8 and FADD like apoptosis regulator [Source:NCBI gene;Acc:414381]
TRAK2	ENSSSCG00000016104	trafficking kinesin protein 2 [Source:NCBI gene;Acc:100511477]
FLACC1	ENSSSCG00000016105	flagellum associated containing coiled-coil domains 1 [Source:NCBI gene;Acc:100625172]
C2CD6	ENSSSCG00000016107	C2 calcium dependent domain containing 6 [Source:NCBI gene;Acc:100511840]
ALS2	ENSSSCG00000016109	alsin Rho guanine nucleotide exchange factor ALS2 [Source:NCBI gene;Acc:100626864]
FZD7	ENSSSCG00000016111	frizzled class receptor 7 [Source:NCBI gene;Acc:100513691]
FAM117B	ENSSSCG00000016114	family with sequence similarity 117 member B [Source:NCBI gene;Acc:100512564]
INO80D	ENSSSCG00000016125	INO80 complex subunit D [Source:NCBI gene;Acc:100157743]
NDUFS1	ENSSSCG00000016127	NADH:ubiquinone oxidoreductase core subunit S1 [Source:NCBI gene;Acc:100516402]
GPR1	ENSSSCG00000016129	G protein-coupled receptor 1 [Source:NCBI gene;Acc:100415936]
MAP2	ENSSSCG00000016151	microtubule associated protein 2 [Source:NCBI gene;Acc:100153306]
ATIC	ENSSSCG00000016173	5-aminoimidazole-4-carboxamide ribonucleotide formyltransferase/IMP cyclohydrolase [Source:NCBI gene;Acc:100170854]
CUL3	ENSSSCG00000016234	cullin 3 [Source:NCBI gene;Acc:100511787]
DOCK10	ENSSSCG00000016237	dedicator of cytokinesis 10 [Source:NCBI gene;Acc:100512141]
ESYT2	ENSSSCG00000016406	extended synaptotagmin 2 [Source:NCBI gene;Acc:100737296]
TMEM178B	ENSSSCG00000016493	transmembrane protein 178B [Source:NCBI gene;Acc:100738949]
PARP12	ENSSSCG00000016502	poly(ADP-ribose) polymerase family member 12 [Source:NCBI gene;Acc:100515805]
AKR1D1	ENSSSCG00000016519	aldo-keto reductase family 1 member D1 [Source:NCBI gene;Acc:100520813]
CREB3L2	ENSSSCG00000016520	cAMP responsive element binding protein 3 like 2 [Source:NCBI gene;Acc:100520468]
EXOC4	ENSSSCG00000016543	exocyst complex component 4 [Source:NCBI gene;Acc:106504059]
CHCHD3	ENSSSCG00000016545	coiled-coil-helix-coiled-coil-helix domain containing 3 [Source:NCBI gene;Acc:414383]
	ENSSSCG00000016548	podocalyxin like [Source:NCBI gene;Acc:100512201]
TSPAN12	ENSSSCG00000016620	tetraspanin 12 [Source:NCBI gene;Acc:100512202]
KCND2	ENSSSCG00000016621	potassium voltage-gated channel subfamily D member 2 [Source:NCBI gene;Acc:100512382]
CTTNBP2	ENSSSCG00000016625	cortactin binding protein 2 [Source:NCBI gene;Acc:100517505]
ST7	ENSSSCG00000016629	suppression of tumorigenicity 7 [Source:NCBI gene;Acc:100125380]
PPP1R3A	ENSSSCG00000016640	protein phosphatase 1 regulatory subunit 3A [Source:NCBI gene;Acc:100518588]
GPR85	ENSSSCG00000016642	G protein-coupled receptor 85 [Source:NCBI gene;Acc:100736987]
	ENSSSCG00000016649
IMMP2L	ENSSSCG00000016650	inner mitochondrial membrane peptidase subunit 2 [Source:NCBI gene;Acc:100521052]
	ENSSSCG00000016651
LRRN3	ENSSSCG00000016652	leucine rich repeat neuronal 3 [Source:NCBI gene;Acc:100520161]
BMPER	ENSSSCG00000016665	BMP binding endothelial regulator [Source:NCBI gene;Acc:100525197]
CREB5	ENSSSCG00000016690	cAMP responsive element binding protein 5 [Source:NCBI gene;Acc:100515635]
EVX1	ENSSSCG00000016696	even-skipped homeobox 1 [Source:NCBI gene;Acc:100518282]
OSBPL3	ENSSSCG00000016715	oxysterol binding protein like 3 [Source:NCBI gene;Acc:100523342]
TNS3	ENSSSCG00000016725	tensin 3 [Source:NCBI gene;Acc:100524966]
IGFBP1	ENSSSCG00000016728	insulin like growth factor binding protein 1 [Source:NCBI gene;Acc:397270]
	ENSSSCG00000016789
	ENSSSCG00000016796
	ENSSSCG00000016800
CDH10	ENSSSCG00000016802	cadherin 10 [Source:NCBI gene;Acc:100523754]
OSMR	ENSSSCG00000016851	oncostatin M receptor [Source:NCBI gene;Acc:100519398]
IPO11	ENSSSCG00000016938	importin 11 [Source:NCBI gene;Acc:100525544]
MAST4	ENSSSCG00000016956	microtubule associated serine/threonine kinase family member 4 [Source:NCBI gene;Acc:100514689]
RARS1	ENSSSCG00000017015	arginyl-tRNA synthetase 1 [Source:NCBI gene;Acc:414410]
IL12B	ENSSSCG00000017044	interleukin 12B [Source:NCBI gene;Acc:397076]
GLRA1	ENSSSCG00000017078	glycine receptor alpha 1 [Source:NCBI gene;Acc:100513384]
MARCHF6	ENSSSCG00000017094	membrane associated ring-CH-type finger 6 [Source:NCBI gene;Acc:100170772]
TENT4A	ENSSSCG00000017102	terminal nucleotidyltransferase 4A [Source:NCBI gene;Acc:100517864]
IRX4	ENSSSCG00000017112	iroquois homeobox 4 [Source:NCBI gene;Acc:100519749]
LPCAT1	ENSSSCG00000017116	lysophosphatidylcholine acyltransferase 1 [Source:NCBI gene;Acc:100217397]
METRNL	ENSSSCG00000017137	meteorin like, glial cell differentiation regulator [Source:NCBI gene;Acc:100512305]
GALK1	ENSSSCG00000017203	galactokinase 1 [Source:NCBI gene;Acc:100521514]
ITGB4	ENSSSCG00000017204	integrin subunit beta 4 [Source:NCBI gene;Acc:100521988]
SLC16A5	ENSSSCG00000017215	solute carrier family 16 member 5 [Source:NCBI gene;Acc:100514790]
	ENSSSCG00000017216
HID1	ENSSSCG00000017219	HID1 domain containing [Source:NCBI gene;Acc:100736965]
OTOP2	ENSSSCG00000017222	otopetrin 2 [Source:NCBI gene;Acc:100512069]
FAM20A	ENSSSCG00000017258	FAM20A golgi associated secretory pathway pseudokinase [Source:NCBI gene;Acc:100522273]
LHX1	ENSSSCG00000017692	LIM homeobox 1 [Source:NCBI gene;Acc:100513681]
CCL1	ENSSSCG00000017720	C-C motif chemokine ligand 1 [Source:NCBI gene;Acc:100310829]
UTP6	ENSSSCG00000017745	coordinator of PRMT5 and differentiation stimulator [Source:NCBI gene;Acc:100524339]
METTL16	ENSSSCG00000017832	methyltransferase like 16 [Source:NCBI gene;Acc:100512985]
ssc-mir-365-2	ENSSSCG00000018147	ssc-mir-365-2 [Source:miRBase;Acc:MI0013120]
U6	ENSSSCG00000018232	U6 spliceosomal RNA [Source:RFAM;Acc:RF00026]
U6	ENSSSCG00000018251	U6 spliceosomal RNA [Source:RFAM;Acc:RF00026]
U2	ENSSSCG00000018323	U2 spliceosomal RNA [Source:RFAM;Acc:RF00004]
SNORD54	ENSSSCG00000018353	small nucleolar RNA, C/D box 54 [Source:HGNC Symbol;Acc:HGNC:10204]
	ENSSSCG00000018460
	ENSSSCG00000018653
	ENSSSCG00000018686
U6	ENSSSCG00000018780	U6 spliceosomal RNA [Source:RFAM;Acc:RF00026]
	ENSSSCG00000018795
	ENSSSCG00000019028
U6	ENSSSCG00000019156	U6 spliceosomal RNA [Source:RFAM;Acc:RF00026]
ssc-mir-9-3	ENSSSCG00000019173	ssc-mir-9-3 [Source:miRBase;Acc:MI0022123]
ssc-mir-708	ENSSSCG00000019199	ssc-mir-708 [Source:miRBase;Acc:MI0013154]
U6	ENSSSCG00000019308	U6 spliceosomal RNA [Source:RFAM;Acc:RF00026]
U6	ENSSSCG00000019377	U6 spliceosomal RNA [Source:RFAM;Acc:RF00026]
U1	ENSSSCG00000019379	U1 spliceosomal RNA [Source:RFAM;Acc:RF00003]
U6	ENSSSCG00000019480	U6 spliceosomal RNA [Source:RFAM;Acc:RF00026]
U6	ENSSSCG00000019533	U6 spliceosomal RNA [Source:RFAM;Acc:RF00026]
ssc-mir-181a-1	ENSSSCG00000019722	ssc-mir-181a-1 [Source:miRBase;Acc:MI0010686]
U6	ENSSSCG00000019766	U6 spliceosomal RNA [Source:RFAM;Acc:RF00026]
	ENSSSCG00000019814
ssc-mir-138	ENSSSCG00000019971	ssc-mir-138 [Source:miRBase;Acc:MI0022131]
U6	ENSSSCG00000020037	U6 spliceosomal RNA [Source:RFAM;Acc:RF00026]
U1	ENSSSCG00000020195	U1 spliceosomal RNA [Source:RFAM;Acc:RF00003]
U6	ENSSSCG00000020227	U6 spliceosomal RNA [Source:RFAM;Acc:RF00026]
U6	ENSSSCG00000020256	U6 spliceosomal RNA [Source:RFAM;Acc:RF00026]
	ENSSSCG00000020337
U6	ENSSSCG00000020347	U6 spliceosomal RNA [Source:RFAM;Acc:RF00026]
	ENSSSCG00000020353
	ENSSSCG00000020423
U6	ENSSSCG00000020537	U6 spliceosomal RNA [Source:RFAM;Acc:RF00026]
MAP3K8	ENSSSCG00000020705	mitogen-activated protein kinase kinase kinase 8 [Source:NCBI gene;Acc:100622217]
FAM160A1	ENSSSCG00000020717	family with sequence similarity 160 member A1 [Source:NCBI gene;Acc:100627876]
RABGAP1	ENSSSCG00000020743	RAB GTPase activating protein 1 [Source:NCBI gene;Acc:100155286]
BTBD3	ENSSSCG00000020853	BTB domain containing 3 [Source:NCBI gene;Acc:100156598]
NUS1	ENSSSCG00000020885	NUS1 dehydrodolichyl diphosphate synthase subunit [Source:NCBI gene;Acc:100154658]
NRIP1	ENSSSCG00000021038	nuclear receptor interacting protein 1 [Source:NCBI gene;Acc:106505834]
BRWD1	ENSSSCG00000021042	proteasome assembly chaperone 1 [Source:NCBI gene;Acc:100625573]
TPH2	ENSSSCG00000021122	tryptophan hydroxylase 2 [Source:NCBI gene;Acc:100627725]
SNORD29	ENSSSCG00000021268	Small nucleolar RNA SNORD29 [Source:RFAM;Acc:RF00070]
PLXNA4	ENSSSCG00000021562	plexin A4 [Source:NCBI gene;Acc:100620243]
HSD17B12	ENSSSCG00000021739	hydroxysteroid 17-beta dehydrogenase 12 [Source:NCBI gene;Acc:100312972]
MCF2L2	ENSSSCG00000021749	MCF.2 cell line derived transforming sequence-like 2 [Source:NCBI gene;Acc:100624866]
U6	ENSSSCG00000021807	U6 spliceosomal RNA [Source:RFAM;Acc:RF00026]
SYT7	ENSSSCG00000021906	synaptotagmin 7 [Source:NCBI gene;Acc:100521541]
TAS2R39	ENSSSCG00000021954	taste 2 receptor member 39 [Source:NCBI gene;Acc:100621890]
SMYD3	ENSSSCG00000022034	SET and MYND domain containing 3 [Source:NCBI gene;Acc:100294707]
RASSF10	ENSSSCG00000022060	Ras association domain family member 10 [Source:NCBI gene;Acc:100625955]
MLNR	ENSSSCG00000022064	motilin receptor [Source:NCBI gene;Acc:100620836]
FNDC3A	ENSSSCG00000022159	fibronectin type III domain containing 3A [Source:NCBI gene;Acc:100620938]
FASLG	ENSSSCG00000022226	Fas ligand (TNF superfamily, member 6) [Source:NCBI gene;Acc:396726]
OTOL1	ENSSSCG00000022248	otolin 1 [Source:NCBI gene;Acc:100623105]
SLC18A3	ENSSSCG00000022274	solute carrier family 18 member A3 [Source:NCBI gene;Acc:100157804]
U6	ENSSSCG00000022291	U6 spliceosomal RNA [Source:RFAM;Acc:RF00026]
CDK15	ENSSSCG00000022296	cyclin dependent kinase 15 [Source:NCBI gene;Acc:100513315]
STK10	ENSSSCG00000022478	serine/threonine kinase 10 [Source:NCBI gene;Acc:100524465]
MATN1	ENSSSCG00000022554	matrilin 1 [Source:NCBI gene;Acc:100624277]
CAPRIN2	ENSSSCG00000022611	caprin family member 2 [Source:NCBI gene;Acc:100624034]
SLC7A11	ENSSSCG00000022649	solute carrier family 7 member 11 [Source:NCBI gene;Acc:100623148]
GALNT13	ENSSSCG00000022671	polypeptide N-acetylgalactosaminyltransferase 13 [Source:NCBI gene;Acc:100520278]
PPA2	ENSSSCG00000022788	inorganic pyrophosphatase 2 [Source:NCBI gene;Acc:100521105]
	ENSSSCG00000022794	HHIP like 1 [Source:NCBI gene;Acc:100625046]
PPP1R3B	ENSSSCG00000022797	protein phosphatase 1 regulatory subunit 3B [Source:NCBI gene;Acc:100515931]
ABCC12	ENSSSCG00000022813	ATP binding cassette subfamily C member 12 [Source:NCBI gene;Acc:100627900]
GRM8	ENSSSCG00000022865	glutamate metabotropic receptor 8 [Source:NCBI gene;Acc:100524120]
POLR2B	ENSSSCG00000022955	RNA polymerase II subunit B [Source:NCBI gene;Acc:397001]
CLMP	ENSSSCG00000022961	CXADR like membrane protein [Source:NCBI gene;Acc:100512427]
	ENSSSCG00000023041	poly(rC) binding protein 3 [Source:NCBI gene;Acc:100624867]
TARDBP	ENSSSCG00000023126	TAR DNA binding protein [Source:NCBI gene;Acc:100739753]
CENPE	ENSSSCG00000023296	centromere protein E [Source:NCBI gene;Acc:100626792]
FBXW11	ENSSSCG00000023307	F-box and WD repeat domain containing 11 [Source:NCBI gene;Acc:100523218]
REST	ENSSSCG00000023357	RE1-silencing transcription factor-like [Source:NCBI gene;Acc:100621006]
U6	ENSSSCG00000023375	U6 spliceosomal RNA [Source:RFAM;Acc:RF00026]
ZBBX	ENSSSCG00000023393	zinc finger B-box domain containing [Source:NCBI gene;Acc:100155204]
	ENSSSCG00000023479	NCK associated protein 5 [Source:NCBI gene;Acc:100513689]
AFF1	ENSSSCG00000023593	AF4/FMR2 family member 1 [Source:NCBI gene;Acc:100739621]
PTPRJ	ENSSSCG00000023709	protein tyrosine phosphatase receptor type J [Source:NCBI gene;Acc:100524973]
TFB2M	ENSSSCG00000023775	transcription factor B2, mitochondrial [Source:NCBI gene;Acc:102161798]
SEMA3C	ENSSSCG00000023784	semaphorin 3C [Source:NCBI gene;Acc:100624508]
ACSF3	ENSSSCG00000023866	acyl-CoA synthetase family member 3 [Source:NCBI gene;Acc:100739500]
	ENSSSCG00000023904
P3H1	ENSSSCG00000023920	prolyl 3-hydroxylase 1 [Source:NCBI gene;Acc:100620503]
RECQL5	ENSSSCG00000023978	RecQ like helicase 5 [Source:NCBI gene;Acc:100626380]
AKAP10	ENSSSCG00000024030	A-kinase anchoring protein 10 [Source:NCBI gene;Acc:397262]
	ENSSSCG00000024129	cytochrome P450 4X1 [Source:NCBI gene;Acc:100627093]
AMPH	ENSSSCG00000024136	amphiphysin [Source:NCBI gene;Acc:100626324]
ETV6	ENSSSCG00000024152	ETS variant transcription factor 6 [Source:NCBI gene;Acc:100157726]
TGIF1	ENSSSCG00000024174	TGFB induced factor homeobox 1 [Source:NCBI gene;Acc:100625732]
Metazoa_SRP	ENSSSCG00000024195	Metazoan signal recognition particle RNA [Source:RFAM;Acc:RF00017]
CCDC91	ENSSSCG00000024232	coiled-coil domain containing 91 [Source:NCBI gene;Acc:100513281]
RNASEH2B	ENSSSCG00000024385	ribonuclease H2 subunit B [Source:NCBI gene;Acc:100625239]
RBBP8	ENSSSCG00000024419	RB binding protein 8, endonuclease [Source:NCBI gene;Acc:100621518]
SIDT1	ENSSSCG00000024429	SID1 transmembrane family member 1 [Source:NCBI gene;Acc:100625203]
USP25	ENSSSCG00000024623	ubiquitin specific peptidase 25 [Source:NCBI gene;Acc:100628105]
TECRL	ENSSSCG00000024681	trans-2,3-enoyl-CoA reductase like [Source:NCBI gene;Acc:100621613]
RRBP1	ENSSSCG00000024692	ribosome binding protein 1 [Source:NCBI gene;Acc:100154945]
BBS9	ENSSSCG00000024754	Bardet-Biedl syndrome 9 [Source:NCBI gene;Acc:100525726]
ISG20	ENSSSCG00000024867	interferon stimulated exonuclease gene 20 [Source:NCBI gene;Acc:448855]
PDGFC	ENSSSCG00000024960	platelet derived growth factor C [Source:NCBI gene;Acc:100515267]
ETV3	ENSSSCG00000024970	ETS variant transcription factor 3 [Source:NCBI gene;Acc:100738127]
	ENSSSCG00000024973	guanylate binding protein 1, interferon-inducible [Source:NCBI gene;Acc:100151938]
NEGR1	ENSSSCG00000025085	neuronal growth regulator 1 [Source:NCBI gene;Acc:106507646]
CCDC58	ENSSSCG00000025107	coiled-coil domain containing 58 [Source:NCBI gene;Acc:100627794]
GRIK1	ENSSSCG00000025119	glutamate ionotropic receptor kainate type subunit 1 [Source:NCBI gene;Acc:100624513]
ZNF507	ENSSSCG00000025139	zinc finger protein 507 [Source:NCBI gene;Acc:100524681]
U6	ENSSSCG00000025143	U6 spliceosomal RNA [Source:RFAM;Acc:RF00026]
	ENSSSCG00000025271	paired immunoglobulin-like type 2 receptor beta [Source:NCBI gene;Acc:100514951]
SF3B3	ENSSSCG00000025323	splicing factor 3b subunit 3 [Source:NCBI gene;Acc:100512659]
MIB1	ENSSSCG00000025478	mindbomb E3 ubiquitin protein ligase 1 [Source:NCBI gene;Acc:100628163]
SSPN	ENSSSCG00000025531	sarcospan [Source:NCBI gene;Acc:100515546]
ALDH1A2	ENSSSCG00000025578	aldehyde dehydrogenase 1 family member A2 [Source:NCBI gene;Acc:100737077]
TP63	ENSSSCG00000025592	tumor protein p63 [Source:NCBI gene;Acc:100625258]
	ENSSSCG00000025593	transporter 2, ATP binding cassette subfamily B member [Source:NCBI gene;Acc:733650]
CXXC4	ENSSSCG00000025621	CXXC finger protein 4 [Source:NCBI gene;Acc:100521810]
RAVER2	ENSSSCG00000025672	ribonucleoprotein, PTB binding 2 [Source:NCBI gene;Acc:100623447]
ST6GAL1	ENSSSCG00000025770	ST6 beta-galactoside alpha-2,6-sialyltransferase 1 [Source:NCBI gene;Acc:100302026]
NOA1	ENSSSCG00000025792	nitric oxide-associated protein 1-like [Source:NCBI gene;Acc:100621115]
MSRB3	ENSSSCG00000026004	methionine sulfoxide reductase B3 [Source:NCBI gene;Acc:100511693]
	ENSSSCG00000026043	transglutaminase 3 [Source:NCBI gene;Acc:100153042]
TKTL2	ENSSSCG00000026079	transketolase like 2 [Source:HGNC Symbol;Acc:HGNC:25313]
ZBTB20	ENSSSCG00000026113	zinc finger and BTB domain containing 20 [Source:NCBI gene;Acc:100624908]
MPP4	ENSSSCG00000026184	membrane palmitoylated protein 4 [Source:NCBI gene;Acc:100626771]
ATP13A5	ENSSSCG00000026260	ATPase 13A5 [Source:NCBI gene;Acc:100154528]
NETO2	ENSSSCG00000026318	neuropilin and tolloid like 2 [Source:NCBI gene;Acc:100626670]
	ENSSSCG00000026339	family with sequence similarity 25 member A [Source:NCBI gene;Acc:100155089]
NRP2	ENSSSCG00000026383	neuropilin 2 [Source:NCBI gene;Acc:100622637]
	ENSSSCG00000026402	adhesion G protein-coupled receptor E3-like [Source:NCBI gene;Acc:100522787]
CCDC73	ENSSSCG00000026433	coiled-coil domain containing 73 [Source:NCBI gene;Acc:100516315]
SLC23A2	ENSSSCG00000026466	solute carrier family 23 member 2 [Source:NCBI gene;Acc:397367]
	ENSSSCG00000026598	olfactory receptor 2L3-like [Source:NCBI gene;Acc:100511681]
U6	ENSSSCG00000026634	U6 spliceosomal RNA [Source:RFAM;Acc:RF00026]
	ENSSSCG00000026659	ADAM metallopeptidase domain 29 [Source:NCBI gene;Acc:100153750]
SNORD26	ENSSSCG00000026837	Small nucleolar RNA SNORD26 [Source:RFAM;Acc:RF00087]
CDH18	ENSSSCG00000026842	cadherin 18 [Source:NCBI gene;Acc:100625674]
CASP10	ENSSSCG00000026940	caspase 10 [Source:NCBI gene;Acc:100154896]
	ENSSSCG00000026941
	ENSSSCG00000026960	zinc finger protein 280D [Source:NCBI gene;Acc:100513772]
ROS1	ENSSSCG00000026978	ROS proto-oncogene 1, receptor tyrosine kinase [Source:NCBI gene;Acc:100156931]
U1	ENSSSCG00000027038	U1 spliceosomal RNA [Source:RFAM;Acc:RF00003]
EMC7	ENSSSCG00000027051	ER membrane protein complex subunit 7 [Source:NCBI gene;Acc:100626410]
DPY19L1	ENSSSCG00000027063	dpy-19 like C-mannosyltransferase 1 [Source:NCBI gene;Acc:100525550]
DONSON	ENSSSCG00000027089	downstream neighbor of SON [Source:NCBI gene;Acc:100620553]
SCP2	ENSSSCG00000027114	sterol carrier protein 2 [Source:NCBI gene;Acc:397439]
	ENSSSCG00000027225
TNPO1	ENSSSCG00000027293	transportin 1 [Source:NCBI gene;Acc:100627484]
HERPUD2	ENSSSCG00000027389	HERPUD family member 2 [Source:NCBI gene;Acc:100738688]
U6	ENSSSCG00000027416	U6 spliceosomal RNA [Source:RFAM;Acc:RF00026]
	ENSSSCG00000027421
NSUN3	ENSSSCG00000027432	NOP2/Sun RNA methyltransferase 3 [Source:NCBI gene;Acc:100625260]
HAO1	ENSSSCG00000027439	hydroxyacid oxidase 1 [Source:NCBI gene;Acc:100627803]
FBXO22	ENSSSCG00000027457	ubiquitin conjugating enzyme E2 Q2 [Source:NCBI gene;Acc:100621770]
	ENSSSCG00000027589
FAM172A	ENSSSCG00000027608	family with sequence similarity 172 member A [Source:NCBI gene;Acc:100521436]
GC	ENSSSCG00000027609	GC vitamin D binding protein [Source:NCBI gene;Acc:448964]
	ENSSSCG00000027665	tyrosine-protein phosphatase non-receptor type substrate 1 [Source:NCBI gene;Acc:102161654]
	ENSSSCG00000027678	coiled-coil domain containing 175 [Source:NCBI gene;Acc:100622158]
ZFR	ENSSSCG00000027681	zinc finger RNA binding protein [Source:NCBI gene;Acc:100624470]
	ENSSSCG00000027732
LRRFIP2	ENSSSCG00000027738	LRR binding FLII interacting protein 2 [Source:NCBI gene;Acc:100626059]
ABCG1	ENSSSCG00000027745	ATP binding cassette subfamily G member 1 [Source:NCBI gene;Acc:100620416]
CNR2	ENSSSCG00000027849	cannabinoid receptor 2 [Source:NCBI gene;Acc:100621002]
ABHD3	ENSSSCG00000028010	abhydrolase domain containing 3 [Source:NCBI gene;Acc:100524684]
DTNA	ENSSSCG00000028047	dystrobrevin alpha [Source:NCBI gene;Acc:100627907]
CAPZA2	ENSSSCG00000028113	capping actin protein of muscle Z-line subunit alpha 2 [Source:NCBI gene;Acc:100037958]
CDK5RAP2	ENSSSCG00000028117	CDK5 regulatory subunit associated protein 2 [Source:NCBI gene;Acc:100737979]
CASP8	ENSSSCG00000028157	caspase 8 [Source:NCBI gene;Acc:595105]
	ENSSSCG00000028195	glutamate rich 1 [Source:NCBI gene;Acc:100620858]
DICER1	ENSSSCG00000028225	dicer 1, ribonuclease III [Source:NCBI gene;Acc:100505387]
CRYZL1	ENSSSCG00000028377	crystallin zeta like 1 [Source:NCBI gene;Acc:100049689]
	ENSSSCG00000028513	vitamin K epoxide reductase complex subunit 1 like 1 [Source:NCBI gene;Acc:100518062]
PLEKHB2	ENSSSCG00000028679	pleckstrin homology domain containing B2 [Source:NCBI gene;Acc:100622476]
RPS6KA4	ENSSSCG00000028806	ribosomal protein S6 kinase A4 [Source:NCBI gene;Acc:100626270]
CAND1	ENSSSCG00000028869	cullin associated and neddylation dissociated 1 [Source:NCBI gene;Acc:100514460]
CSTA	ENSSSCG00000028871	stefin A1 [Source:NCBI gene;Acc:396866]
UST	ENSSSCG00000028974	uronyl 2-sulfotransferase [Source:NCBI gene;Acc:100738738]
DOK6	ENSSSCG00000028977	docking protein 6 [Source:NCBI gene;Acc:100517871]
ZNF558	ENSSSCG00000029035	zinc finger protein 558 [Source:NCBI gene;Acc:100514703]
DRD1	ENSSSCG00000029037	dopamine receptor D1 [Source:NCBI gene;Acc:100144487]
U5	ENSSSCG00000029098	U5 spliceosomal RNA [Source:RFAM;Acc:RF00020]
	ENSSSCG00000029127
KCNU1	ENSSSCG00000029131	potassium calcium-activated channel subfamily U member 1 [Source:NCBI gene;Acc:100521933]
MAPKAP1	ENSSSCG00000029169	MAPK associated protein 1 [Source:NCBI gene;Acc:100622774]
KCNMB3	ENSSSCG00000029240	potassium calcium-activated channel subfamily M regulatory beta subunit 3 [Source:NCBI gene;Acc:100271878]
AOX1	ENSSSCG00000029606	aldehyde oxidase 1 [Source:NCBI gene;Acc:100523701]
USP24	ENSSSCG00000029633	ubiquitin specific peptidase 24 [Source:NCBI gene;Acc:100620405]
FAM193A	ENSSSCG00000029745	family with sequence similarity 193 member A [Source:NCBI gene;Acc:100517173]
	ENSSSCG00000029755
FZD2	ENSSSCG00000029838	frizzled class receptor 2 [Source:HGNC Symbol;Acc:HGNC:4040]
LYVE1	ENSSSCG00000029886	lymphatic vessel endothelial hyaluronan receptor 1 [Source:NCBI gene;Acc:397626]
PDE9A	ENSSSCG00000030016	phosphodiesterase 9A [Source:NCBI gene;Acc:100127144]
SORCS1	ENSSSCG00000030026	sortilin related VPS10 domain containing receptor 1 [Source:NCBI gene;Acc:100155686]
SNORA70	ENSSSCG00000030085	Small nucleolar RNA SNORA70 [Source:RFAM;Acc:RF00156]
CDS2	ENSSSCG00000030123	CDP-diacylglycerol synthase 2 [Source:NCBI gene;Acc:100170145]
HTR1F	ENSSSCG00000030227	5-hydroxytryptamine receptor 1F [Source:NCBI gene;Acc:397187]
ASB5	ENSSSCG00000030395	ankyrin repeat and SOCS box containing 5 [Source:NCBI gene;Acc:100511413]
SETD7	ENSSSCG00000030396	SET domain containing 7, histone lysine methyltransferase [Source:NCBI gene;Acc:100626704]
PIK3CA	ENSSSCG00000030413	phosphatidylinositol-4,5-bisphosphate 3-kinase catalytic subunit alpha [Source:NCBI gene;Acc:100621789]
MRPL42	ENSSSCG00000030478	mitochondrial ribosomal protein L42 [Source:NCBI gene;Acc:100519660]
ELFN1	ENSSSCG00000030485	extracellular leucine rich repeat and fibronectin type III domain containing 1 [Source:NCBI gene;Acc:100621128]
POLR2M	ENSSSCG00000030605	RNA polymerase II subunit M [Source:NCBI gene;Acc:102160778]
RESF1	ENSSSCG00000030616	retroelement silencing factor 1 [Source:NCBI gene;Acc:100511327]
ALDH1L1	ENSSSCG00000030626	aldehyde dehydrogenase 1 family member L1 [Source:NCBI gene;Acc:100622210]
	ENSSSCG00000030971
XBP1	ENSSSCG00000030996	X-box binding protein 1 [Source:NCBI gene;Acc:100217386]
CSMD3	ENSSSCG00000031031	CUB and Sushi multiple domains 3 [Source:NCBI gene;Acc:100621741]
HAND1	ENSSSCG00000031080	heart and neural crest derivatives expressed 1 [Source:NCBI gene;Acc:541594]
PREX1	ENSSSCG00000031118	phosphatidylinositol-3,4,5-trisphosphate dependent Rac exchange factor 1 [Source:NCBI gene;Acc:100621481]
PPIC	ENSSSCG00000031128	peptidylprolyl isomerase C [Source:NCBI gene;Acc:100511313]
SIRT5	ENSSSCG00000031129	sirtuin 5 [Source:NCBI gene;Acc:100125966]
	ENSSSCG00000031140
	ENSSSCG00000031141	ATP-binding cassette sub-family A member 13 [Source:NCBI gene;Acc:100514786]
	ENSSSCG00000031172	ring finger protein 11 [Source:NCBI gene;Acc:100736575]
KCNMB4	ENSSSCG00000031173	potassium calcium-activated channel subfamily M regulatory beta subunit 4 [Source:NCBI gene;Acc:100154587]
	ENSSSCG00000031193
U6	ENSSSCG00000031263	U6 spliceosomal RNA [Source:RFAM;Acc:RF00026]
STRADB	ENSSSCG00000031271	STE20 related adaptor beta [Source:NCBI gene;Acc:100511661]
GRIN2A	ENSSSCG00000031290	glutamate ionotropic receptor NMDA type subunit 2A [Source:NCBI gene;Acc:100736832]
AGBL4	ENSSSCG00000031300	BEN domain containing 5 [Source:NCBI gene;Acc:110261423]
ST8SIA1	ENSSSCG00000031329	ST8 alpha-N-acetyl-neuraminide alpha-2,8-sialyltransferase 1 [Source:NCBI gene;Acc:100625270]
	ENSSSCG00000031330
SNX18	ENSSSCG00000031337	sorting nexin 18 [Source:NCBI gene;Acc:100518876]
	ENSSSCG00000031374	uncharacterized LOC106504574 [Source:NCBI gene;Acc:106504574]
	ENSSSCG00000031376
C9orf40	ENSSSCG00000031382	chromosome 1 C9orf40 homolog [Source:NCBI gene;Acc:100517993]
	ENSSSCG00000031405
MRPS14	ENSSSCG00000031435	mitochondrial ribosomal protein S14 [Source:NCBI gene;Acc:100739774]
	ENSSSCG00000031496	olfactory receptor 5B2-like [Source:NCBI gene;Acc:100620388]
	ENSSSCG00000031516	olfactory receptor 1J4-like [Source:NCBI gene;Acc:110259676]
SYT13	ENSSSCG00000031590	synaptotagmin 13 [Source:NCBI gene;Acc:100520062]
SERPINB9	ENSSSCG00000031615	serpin peptidase inhibitor, clade B (ovalbumin), member 9 [Source:NCBI gene;Acc:100126851]
	ENSSSCG00000031640	endogenous retrovirus group V member 2 Env polyprotein [Source:NCBI gene;Acc:100624077]
	ENSSSCG00000031661	chromosome 5 C12orf75 homolog [Source:NCBI gene;Acc:102162677]
U6	ENSSSCG00000031670	U6 spliceosomal RNA [Source:RFAM;Acc:RF00026]
GXYLT1	ENSSSCG00000031701	glucoside xylosyltransferase 1 [Source:NCBI gene;Acc:110260763]
SOX14	ENSSSCG00000031721	SRY-box transcription factor 14 [Source:HGNC Symbol;Acc:HGNC:11193]
TSHR	ENSSSCG00000031771	thyroid stimulating hormone receptor [Source:NCBI gene;Acc:397560]
	ENSSSCG00000031778	cytochrome P450 4X1-like [Source:NCBI gene;Acc:110255328]
TMEM139	ENSSSCG00000031799	transmembrane protein 139 [Source:NCBI gene;Acc:100521303]
U6	ENSSSCG00000031862	U6 spliceosomal RNA [Source:RFAM;Acc:RF00026]
ENTPD4	ENSSSCG00000031871	ectonucleoside triphosphate diphosphohydrolase 4 [Source:NCBI gene;Acc:100155254]
	ENSSSCG00000031893	ADP-ribosylation factor 2 [Source:NCBI gene;Acc:100270721]
	ENSSSCG00000031902
SLC39A10	ENSSSCG00000031954	solute carrier family 39 member 10 [Source:NCBI gene;Acc:110257100]
	ENSSSCG00000032000
EIF4B	ENSSSCG00000032028	eukaryotic translation initiation factor 4B [Source:HGNC Symbol;Acc:HGNC:3285]
	ENSSSCG00000032067	adenylate kinase 2 [Source:NCBI gene;Acc:100620859]
IRX2	ENSSSCG00000032074	iroquois homeobox 2 [Source:NCBI gene;Acc:100620587]
	ENSSSCG00000032084	coiled-coil domain containing 102B [Source:NCBI gene;Acc:106506845]
DKK2	ENSSSCG00000032094	dickkopf WNT signaling pathway inhibitor 2 [Source:NCBI gene;Acc:100519672]
	ENSSSCG00000032122
	ENSSSCG00000032125
C19orf12	ENSSSCG00000032153	chromosome 6 C19orf12 homolog [Source:NCBI gene;Acc:102159538]
SOCS6	ENSSSCG00000032214	suppressor of cytokine signaling 6 [Source:NCBI gene;Acc:100155619]
	ENSSSCG00000032230
U6	ENSSSCG00000032310	U6 spliceosomal RNA [Source:RFAM;Acc:RF00026]
MGAT4C	ENSSSCG00000032321	MGAT4 family member C [Source:NCBI gene;Acc:414851]
THEGL	ENSSSCG00000032353	theg spermatid protein like [Source:NCBI gene;Acc:100521633]
	ENSSSCG00000032413
ANKRD34C	ENSSSCG00000032430	ankyrin repeat domain 34C [Source:NCBI gene;Acc:100156422]
ZADH2	ENSSSCG00000032488	zinc binding alcohol dehydrogenase domain containing 2 [Source:NCBI gene;Acc:100737192]
TRIML1	ENSSSCG00000032493	tripartite motif family like 1 [Source:NCBI gene;Acc:110257368]
	ENSSSCG00000032525
CHRM2	ENSSSCG00000032532	cholinergic receptor muscarinic 2 [Source:NCBI gene;Acc:397498]
RTTN	ENSSSCG00000032574	rotatin [Source:NCBI gene;Acc:100623296]
RAP1B	ENSSSCG00000032595	RAP1B, member of RAS oncogene family [Source:NCBI gene;Acc:100152555]
SREK1	ENSSSCG00000032726	splicing regulatory glutamic acid and lysine rich protein 1 [Source:NCBI gene;Acc:100511789]
	ENSSSCG00000032797	relaxin family peptide receptor 3 [Source:NCBI gene;Acc:100512567]
	ENSSSCG00000032805
DNAH7	ENSSSCG00000032814	dynein axonemal heavy chain 7 [Source:NCBI gene;Acc:100157866]
DNAH5	ENSSSCG00000032827	dynein axonemal heavy chain 5 [Source:NCBI gene;Acc:100623921]
PSMD7	ENSSSCG00000032908	proteasome 26S subunit, non-ATPase 7 [Source:NCBI gene;Acc:100626274]
RNF187	ENSSSCG00000032994	ring finger protein 187 [Source:HGNC Symbol;Acc:HGNC:27146]
	ENSSSCG00000033041	GNAS complex locus [Source:NCBI gene;Acc:100049657]
U6	ENSSSCG00000033066	U6 spliceosomal RNA [Source:RFAM;Acc:RF00026]
U6	ENSSSCG00000033088	U6 spliceosomal RNA [Source:RFAM;Acc:RF00026]
CD163	ENSSSCG00000033146	CD163 molecule [Source:NCBI gene;Acc:397031]
PPP2R3A	ENSSSCG00000033185	protein phosphatase 2 regulatory subunit B''alpha [Source:NCBI gene;Acc:102160080]
TCF21	ENSSSCG00000033258	transcription factor 21 [Source:NCBI gene;Acc:100152962]
	ENSSSCG00000033386
DEPDC1	ENSSSCG00000033443	DEP domain containing 1 [Source:NCBI gene;Acc:110261209]
	ENSSSCG00000033490
VSTM1	ENSSSCG00000033542	V-set and transmembrane domain-containing protein 1 [Source:NCBI gene;Acc:100622306]
	ENSSSCG00000033578
RGS7BP	ENSSSCG00000033581	regulator of G protein signaling 7 binding protein [Source:NCBI gene;Acc:100511050]
SPAI-2	ENSSSCG00000033675	sodium/potassium ATPase inhibitor SPAI-2 [Source:NCBI gene;Acc:445518]
U6	ENSSSCG00000033714	U6 spliceosomal RNA [Source:RFAM;Acc:RF00026]
FOXG1	ENSSSCG00000033761	forkhead box G1 [Source:NCBI gene;Acc:110261579]
NDST4	ENSSSCG00000033834	bifunctional heparan sulfate N-deacetylase/N-sulfotransferase 4 [Source:NCBI gene;Acc:100512003]
	ENSSSCG00000033851	olfactory receptor 2AK2-like [Source:NCBI gene;Acc:110259601]
ZMAT3	ENSSSCG00000033860	zinc finger matrin-type 3 [Source:NCBI gene;Acc:100621584]
RAB38	ENSSSCG00000033878	RAB38, member RAS oncogene family [Source:NCBI gene;Acc:100621853]
	ENSSSCG00000033918	CD300a molecule [Source:NCBI gene;Acc:102160266]
UTS2B	ENSSSCG00000033951	urotensin 2B [Source:NCBI gene;Acc:100626084]
U6	ENSSSCG00000033970	U6 spliceosomal RNA [Source:RFAM;Acc:RF00026]
UBE2E3	ENSSSCG00000033987	ubiquitin conjugating enzyme E2 E3 [Source:NCBI gene;Acc:100520938]
	ENSSSCG00000034025
U6	ENSSSCG00000034143	U6 spliceosomal RNA [Source:RFAM;Acc:RF00026]
CBX8	ENSSSCG00000034146	chromobox 8 [Source:NCBI gene;Acc:100514536]
U6	ENSSSCG00000034206	U6 spliceosomal RNA [Source:RFAM;Acc:RF00026]
SKA2	ENSSSCG00000034217	spindle and kinetochore associated complex subunit 2 [Source:NCBI gene;Acc:100520695]
	ENSSSCG00000034240
PMEPA1	ENSSSCG00000034259	prostate transmembrane protein, androgen induced 1 [Source:NCBI gene;Acc:100144523]
ABCA12	ENSSSCG00000034282	ATP binding cassette subfamily A member 12 [Source:NCBI gene;Acc:100512445]
NBEA	ENSSSCG00000034348	neurobeachin [Source:NCBI gene;Acc:100521513]
B3GALT1	ENSSSCG00000034351	beta-1,3-galactosyltransferase 1 [Source:NCBI gene;Acc:100152554]
C8orf37	ENSSSCG00000034398	chromosome 4 C8orf37 homolog [Source:NCBI gene;Acc:100153417]
MEX3C	ENSSSCG00000034427	mex-3 RNA binding family member C [Source:NCBI gene;Acc:100525021]
SNTG1	ENSSSCG00000034495	syntrophin gamma 1 [Source:NCBI gene;Acc:100620960]
TGM6	ENSSSCG00000034528	transglutaminase 6 [Source:NCBI gene;Acc:106506638]
	ENSSSCG00000034539	protein S100-A7-like [Source:NCBI gene;Acc:110260465]
	ENSSSCG00000034559
OBSCN	ENSSSCG00000034569	obscurin, cytoskeletal calmodulin and titin-interacting RhoGEF [Source:NCBI gene;Acc:102157525]
	ENSSSCG00000034582	olfactory receptor 1J4-like [Source:NCBI gene;Acc:110257111]
	ENSSSCG00000034587
	ENSSSCG00000034610	high mobility group AT-hook 2 [Source:NCBI gene;Acc:100513206]
	ENSSSCG00000034662
SH3BP4	ENSSSCG00000034692	SH3 domain binding protein 4 [Source:NCBI gene;Acc:110256943]
	ENSSSCG00000034696	zinc finger protein 501-like [Source:NCBI gene;Acc:110255247]
MFAP3	ENSSSCG00000034706	microfibril associated protein 3 [Source:NCBI gene;Acc:100526255]
PITX2	ENSSSCG00000034708	paired like homeodomain 2 [Source:NCBI gene;Acc:100515395]
KCNH5	ENSSSCG00000034726	potassium voltage-gated channel subfamily H member 5 [Source:NCBI gene;Acc:100510997]
	ENSSSCG00000034794	lysine-specific demethylase 4D-like [Source:NCBI gene;Acc:100627380]
U6	ENSSSCG00000034850	U6 spliceosomal RNA [Source:RFAM;Acc:RF00026]
IRX1	ENSSSCG00000034884	iroquois homeobox 1 [Source:NCBI gene;Acc:110257264]
U6	ENSSSCG00000034957	U6 spliceosomal RNA [Source:RFAM;Acc:RF00026]
	ENSSSCG00000035033	prolactin induced protein [Source:NCBI gene;Acc:100621376]
	ENSSSCG00000035043
	ENSSSCG00000035100	olfactory receptor 1J4-like [Source:NCBI gene;Acc:100523660]
	ENSSSCG00000035135
TMEM237	ENSSSCG00000035161	transmembrane protein 237 [Source:NCBI gene;Acc:100626683]
U6	ENSSSCG00000035184	U6 spliceosomal RNA [Source:RFAM;Acc:RF00026]
	ENSSSCG00000035189	transmembrane protein 37 [Source:NCBI gene;Acc:100522166]
MRPS23	ENSSSCG00000035193	mitochondrial ribosomal protein S23 [Source:NCBI gene;Acc:100511221]
	ENSSSCG00000035204	protein pitchfork-like [Source:NCBI gene;Acc:100523736]
	ENSSSCG00000035209	acidic nuclear phosphoprotein 32 family member E [Source:NCBI gene;Acc:100153768]
	ENSSSCG00000035210
ZBTB18	ENSSSCG00000035213	zinc finger and BTB domain containing 18 [Source:NCBI gene;Acc:100623289]
	ENSSSCG00000035237
RAB27B	ENSSSCG00000035243	RAB27B, member RAS oncogene family [Source:NCBI gene;Acc:100154771]
	ENSSSCG00000035301
FGL1	ENSSSCG00000035335	fibrinogen like 1 [Source:NCBI gene;Acc:100516651]
	ENSSSCG00000035405
	ENSSSCG00000035411	olfactory receptor 7C2-like [Source:NCBI gene;Acc:110259621]
	ENSSSCG00000035439
ZFP42	ENSSSCG00000035444	ZFP42 zinc finger protein [Source:NCBI gene;Acc:100627512]
	ENSSSCG00000035476
IFTAP	ENSSSCG00000035489	intraflagellar transport associated protein [Source:NCBI gene;Acc:100624261]
U6	ENSSSCG00000035517	U6 spliceosomal RNA [Source:RFAM;Acc:RF00026]
	ENSSSCG00000035526
RUNX1	ENSSSCG00000035537	RUNX family transcription factor 1 [Source:NCBI gene;Acc:100512633]
U6	ENSSSCG00000035540	U6 spliceosomal RNA [Source:RFAM;Acc:RF00026]
	ENSSSCG00000035556	olfactory receptor 1J4-like [Source:NCBI gene;Acc:100521356]
	ENSSSCG00000035571
	ENSSSCG00000035577
SUGCT	ENSSSCG00000035581	succinyl-CoA:glutarate-CoA transferase [Source:NCBI gene;Acc:102168155]
GSTK1	ENSSSCG00000035615	glutathione S-transferase kappa 1 [Source:NCBI gene;Acc:100521480]
PLSCR1	ENSSSCG00000035634	phospholipid scramblase 1 [Source:NCBI gene;Acc:100620055]
U6	ENSSSCG00000035638	U6 spliceosomal RNA [Source:RFAM;Acc:RF00026]
C9orf135	ENSSSCG00000035668	chromosome 1 C9orf135 homolog [Source:NCBI gene;Acc:100514445]
ssc-mir-9839	ENSSSCG00000035744	ssc-mir-9839 [Source:miRBase;Acc:MI0031608]
FHIT	ENSSSCG00000035818	fragile histidine triad diadenosine triphosphatase [Source:NCBI gene;Acc:102159722]
CTDSPL2	ENSSSCG00000035827	CTD small phosphatase like 2 [Source:NCBI gene;Acc:102162809]
GFOD1	ENSSSCG00000035867	glucose-fructose oxidoreductase domain containing 1 [Source:NCBI gene;Acc:100739137]
	ENSSSCG00000035927
DSEL	ENSSSCG00000035941	dermatan sulfate epimerase like [Source:NCBI gene;Acc:110261618]
FTO	ENSSSCG00000035949	FTO alpha-ketoglutarate dependent dioxygenase [Source:NCBI gene;Acc:100127165]
	ENSSSCG00000035981
TRIM11	ENSSSCG00000035985	tripartite motif containing 11 [Source:NCBI gene;Acc:106508774]
	ENSSSCG00000036003	olfactory receptor 1J4-like [Source:NCBI gene;Acc:110257108]
CD302	ENSSSCG00000036050	CD302 molecule [Source:NCBI gene;Acc:100126280]
KCNJ3	ENSSSCG00000036078	potassium inwardly rectifying channel subfamily J member 3 [Source:NCBI gene;Acc:396586]
PLAAT1	ENSSSCG00000036094	phospholipase A and acyltransferase 1 [Source:NCBI gene;Acc:100522036]
	ENSSSCG00000036144
CNBD1	ENSSSCG00000036161	cyclic nucleotide binding domain containing 1 [Source:NCBI gene;Acc:100153231]
NMBR	ENSSSCG00000036250	neuromedin B receptor [Source:NCBI gene;Acc:100169653]
U7	ENSSSCG00000036269	U7 small nuclear RNA [Source:RFAM;Acc:RF00066]
	ENSSSCG00000036276
	ENSSSCG00000036325
FAM126B	ENSSSCG00000036339	family with sequence similarity 126 member B [Source:HGNC Symbol;Acc:HGNC:28593]
	ENSSSCG00000036361
	ENSSSCG00000036413
SLC8A1	ENSSSCG00000036418	solute carrier family 8 member A1 [Source:NCBI gene;Acc:100622020]
CCDC50	ENSSSCG00000036423	coiled-coil domain containing 50 [Source:NCBI gene;Acc:100520765]
FZD1	ENSSSCG00000036436	frizzled class receptor 1 [Source:HGNC Symbol;Acc:HGNC:4038]
	ENSSSCG00000036445	C-X-C motif chemokine ligand 13 [Source:NCBI gene;Acc:100524265]
KLF3	ENSSSCG00000036488	Kruppel like factor 3 [Source:NCBI gene;Acc:100174960]
ssc-mir-9792	ENSSSCG00000036489	ssc-mir-9792 [Source:miRBase;Acc:MI0031556]
ARMC8	ENSSSCG00000036610	armadillo repeat containing 8 [Source:NCBI gene;Acc:100738777]
MAIP1	ENSSSCG00000036676	matrix AAA peptidase interacting protein 1 [Source:NCBI gene;Acc:100522576]
	ENSSSCG00000036710
U6	ENSSSCG00000036730	U6 spliceosomal RNA [Source:RFAM;Acc:RF00026]
	ENSSSCG00000036736
KLF15	ENSSSCG00000036742	Kruppel like factor 15 [Source:NCBI gene;Acc:100174957]
	ENSSSCG00000036749
	ENSSSCG00000036761
SLC49A4	ENSSSCG00000036766	solute carrier family 49 member 4 [Source:NCBI gene;Acc:100519567]
U6	ENSSSCG00000036890	U6 spliceosomal RNA [Source:RFAM;Acc:RF00026]
	ENSSSCG00000036894
GALR1	ENSSSCG00000036984	galanin receptor 1 [Source:NCBI gene;Acc:100736969]
SYT4	ENSSSCG00000037079	synaptotagmin 4 [Source:NCBI gene;Acc:110261201]
	ENSSSCG00000037219
RPRM	ENSSSCG00000037225	reprimo, TP53 dependent G2 arrest mediator homolog [Source:NCBI gene;Acc:100738077]
	ENSSSCG00000037246
	ENSSSCG00000037285
ELAVL4	ENSSSCG00000037291	ELAV like RNA binding protein 4 [Source:HGNC Symbol;Acc:HGNC:3315]
PRC1	ENSSSCG00000037307	protein regulator of cytokinesis 1 [Source:NCBI gene;Acc:110261560]
	ENSSSCG00000037349
NEDD4	ENSSSCG00000037499	NEDD4 E3 ubiquitin protein ligase [Source:NCBI gene;Acc:100514504]
	ENSSSCG00000037521
	ENSSSCG00000037596
	ENSSSCG00000037620	lithostathine-like [Source:NCBI gene;Acc:100624628]
SINHCAF	ENSSSCG00000037732	SIN3-HDAC complex associated factor [Source:NCBI gene;Acc:110260716]
TRIQK	ENSSSCG00000037733	triple QxxK/R motif containing [Source:NCBI gene;Acc:110260258]
U6	ENSSSCG00000037774	U6 spliceosomal RNA [Source:RFAM;Acc:RF00026]
	ENSSSCG00000037928
NIPAL1	ENSSSCG00000037950	NIPA like domain containing 1 [Source:NCBI gene;Acc:100520441]
	ENSSSCG00000037952	olfactory receptor 10Q1 [Source:NCBI gene;Acc:100512331]
	ENSSSCG00000037962
FAM92A	ENSSSCG00000037963	CBY1 interacting BAR domain containing 1 [Source:NCBI gene;Acc:100515202]
ALMS1	ENSSSCG00000037977	ALMS1 centrosome and basal body associated protein [Source:NCBI gene;Acc:100516187]
	ENSSSCG00000037981
	ENSSSCG00000038035	elongation factor 1-alpha, somatic form-like [Source:NCBI gene;Acc:100620900]
	ENSSSCG00000038039	olfactory receptor 2T3-like [Source:NCBI gene;Acc:100516426]
SAMSN1	ENSSSCG00000038062	SAM domain, SH3 domain and nuclear localization signals 1 [Source:NCBI gene;Acc:100157298]
	ENSSSCG00000038080	endomucin [Source:NCBI gene;Acc:100628129]
	ENSSSCG00000038107	serine peptidase inhibitor Kazal type 2 [Source:NCBI gene;Acc:100520393]
KRTAP11-1	ENSSSCG00000038131	keratin-associated protein 11-1 [Source:NCBI gene;Acc:100626583]
ADAMTS3	ENSSSCG00000038180	ADAM metallopeptidase with thrombospondin type 1 motif 3 [Source:NCBI gene;Acc:100524818]
ZNF326	ENSSSCG00000038253	DBIRD complex subunit ZNF326 [Source:NCBI gene;Acc:100737600]
	ENSSSCG00000038414
	ENSSSCG00000038418	C-type lectin domain family 4 member E [Source:NCBI gene;Acc:110260748]
	ENSSSCG00000038421
	ENSSSCG00000038429
	ENSSSCG00000038441
	ENSSSCG00000038446	olfactory receptor 1013-like [Source:NCBI gene;Acc:110259718]
TRIB1	ENSSSCG00000038500	tribbles pseudokinase 1 [Source:NCBI gene;Acc:100512960]
	ENSSSCG00000038537
	ENSSSCG00000038565
RBIS	ENSSSCG00000038581	ribosomal biogenesis factor [Source:NCBI gene;Acc:100522371]
FGF12	ENSSSCG00000038584	fibroblast growth factor 12 [Source:NCBI gene;Acc:100152498]
	ENSSSCG00000038616	transmembrane protease serine 11B-like protein [Source:NCBI gene;Acc:100513671]
U6	ENSSSCG00000038636	U6 spliceosomal RNA [Source:RFAM;Acc:RF00026]
U6	ENSSSCG00000038704	U6 spliceosomal RNA [Source:RFAM;Acc:RF00026]
C3orf70	ENSSSCG00000038724	chromosome 13 C3orf70 homolog [Source:NCBI gene;Acc:106504156]
[truncated: 514 more rows]
